# Supplementary material
Source: publisher site journal article supplement (https://www.dovepress.com/get_supplementary_file.php?f=182525-2.xlsx)
Supplement: Supplementary file 1 [file get_supplementary_file.php]

## Sheet: Sheet1
id	term	category	ListHits	ListTotal	PopHits	PopTotal	pval	padj	Enrichment_score	Gene
GO:0002625	regulation of T cell antigen processing and presentation	biological_process	2	304	2	98659	0	0	324.536	NM_000377.2;XM_011543977.1
GO:0047323	[3-methyl-2-oxobutanoate dehydrogenase (acetyl-transferring)] kinase activity	molecular_function	3	304	3	98659	0	0	324.536	NM_001122957.2;NM_001271926.1;NM_005881.3
GO:0060678	dichotomous subdivision of terminal units involved in ureteric bud branching	biological_process	1	304	1	98659	0	0	324.536	NM_004472.2
GO:0072076	nephrogenic mesenchyme development	biological_process	1	304	1	98659	0	0	324.536	NM_004472.2
GO:0072213	metanephric capsule development	biological_process	1	304	1	98659	0	0	324.536	NM_004472.2
GO:0072267	metanephric capsule specification	biological_process	1	304	1	98659	0	0	324.536	NM_004472.2
GO:0036309	protein localization to M-band	biological_process	45	304	59	98659	3.31673e-105	4.25016e-103	247.528	NM_001098623.2;NM_001271223.2;NM_052843.3;XM_005273287.3;XM_005273288.3;XM_005273289.3;XM_005273290.3;XM_005273291.3;XM_005273292.3;XM_005273293.3;XM_005273294.3;XM_005273295.3;XM_005273296.3;XM_005273297.3;XM_005273298.3;XM_005273299.3;XM_005273300.3;XM_005273301.3;XM_005273302.3;XM_005273304.3;XM_005273305.3;XM_005273307.3;XM_005273309.3;XM_005273310.3;XM_006711819.2;XM_006711820.2;XM_006711821…
GO:0031432	titin binding	molecular_function	45	304	115	98659	2.20507e-85	2.47243e-83	126.992	NM_001098623.2;NM_001271223.2;NM_052843.3;XM_005273287.3;XM_005273288.3;XM_005273289.3;XM_005273290.3;XM_005273291.3;XM_005273292.3;XM_005273293.3;XM_005273294.3;XM_005273295.3;XM_005273296.3;XM_005273297.3;XM_005273298.3;XM_005273299.3;XM_005273300.3;XM_005273301.3;XM_005273302.3;XM_005273304.3;XM_005273305.3;XM_005273307.3;XM_005273309.3;XM_005273310.3;XM_006711819.2;XM_006711820.2;XM_006711821…
GO:0030016	myofibril	cellular_component	45	304	154	98659	2.72243e-78	2.71336e-76	94.832	NM_001098623.2;NM_001271223.2;NM_052843.3;XM_005273287.3;XM_005273288.3;XM_005273289.3;XM_005273290.3;XM_005273291.3;XM_005273292.3;XM_005273293.3;XM_005273294.3;XM_005273295.3;XM_005273296.3;XM_005273297.3;XM_005273298.3;XM_005273299.3;XM_005273300.3;XM_005273301.3;XM_005273302.3;XM_005273304.3;XM_005273305.3;XM_005273307.3;XM_005273309.3;XM_005273310.3;XM_006711819.2;XM_006711820.2;XM_006711821…
GO:0031430	M band	cellular_component	45	304	164	98659	7.98265e-77	7.16043e-75	89.0496	NM_001098623.2;NM_001271223.2;NM_052843.3;XM_005273287.3;XM_005273288.3;XM_005273289.3;XM_005273290.3;XM_005273291.3;XM_005273292.3;XM_005273293.3;XM_005273294.3;XM_005273295.3;XM_005273296.3;XM_005273297.3;XM_005273298.3;XM_005273299.3;XM_005273300.3;XM_005273301.3;XM_005273302.3;XM_005273304.3;XM_005273305.3;XM_005273307.3;XM_005273309.3;XM_005273310.3;XM_006711819.2;XM_006711820.2;XM_006711821…
GO:0045214	sarcomere organization	biological_process	45	304	188	98659	1.06976e-73	8.72341e-72	77.6815	NM_001098623.2;NM_001271223.2;NM_052843.3;XM_005273287.3;XM_005273288.3;XM_005273289.3;XM_005273290.3;XM_005273291.3;XM_005273292.3;XM_005273293.3;XM_005273294.3;XM_005273295.3;XM_005273296.3;XM_005273297.3;XM_005273298.3;XM_005273299.3;XM_005273300.3;XM_005273301.3;XM_005273302.3;XM_005273304.3;XM_005273305.3;XM_005273307.3;XM_005273309.3;XM_005273310.3;XM_006711819.2;XM_006711820.2;XM_006711821…
GO:0030506	ankyrin binding	molecular_function	45	304	195	98659	7.14894e-73	5.34383e-71	74.893	NM_001098623.2;NM_001271223.2;NM_052843.3;XM_005273287.3;XM_005273288.3;XM_005273289.3;XM_005273290.3;XM_005273291.3;XM_005273292.3;XM_005273293.3;XM_005273294.3;XM_005273295.3;XM_005273296.3;XM_005273297.3;XM_005273298.3;XM_005273299.3;XM_005273300.3;XM_005273301.3;XM_005273302.3;XM_005273304.3;XM_005273305.3;XM_005273307.3;XM_005273309.3;XM_005273310.3;XM_006711819.2;XM_006711820.2;XM_006711821…
GO:0008307	structural constituent of muscle	molecular_function	45	304	398	98659	1.63851e-57	1.13057e-55	36.6938	NM_001098623.2;NM_001271223.2;NM_052843.3;XM_005273287.3;XM_005273288.3;XM_005273289.3;XM_005273290.3;XM_005273291.3;XM_005273292.3;XM_005273293.3;XM_005273294.3;XM_005273295.3;XM_005273296.3;XM_005273297.3;XM_005273298.3;XM_005273299.3;XM_005273300.3;XM_005273301.3;XM_005273302.3;XM_005273304.3;XM_005273305.3;XM_005273307.3;XM_005273309.3;XM_005273310.3;XM_006711819.2;XM_006711820.2;XM_006711821…
GO:1903754	cortical microtubule plus-end	cellular_component	24	304	33	98659	8.16993e-57	5.23459e-55	236.026	NM_015097.2;XM_006713036.1;XM_006713040.1;XM_006713041.1;XM_006713042.1;XM_006713048.1;XM_006713049.1;XM_006713050.1;XM_006713052.1;XM_006713053.1;XM_006713060.1;XM_011533505.1;XM_011533506.1;XM_011533507.1;XM_011533508.1;XM_011533509.1;XM_011533510.1;XM_011533511.1;XM_011533512.1;XM_011533513.1;XM_011533514.1;XM_011533515.1;XM_011533516.1;XM_011533517.1
GO:0035791	platelet-derived growth factor receptor-beta signaling pathway	biological_process	24	304	44	98659	8.04537e-52	4.81113e-50	177.02	NM_015097.2;XM_006713036.1;XM_006713040.1;XM_006713041.1;XM_006713042.1;XM_006713048.1;XM_006713049.1;XM_006713050.1;XM_006713052.1;XM_006713053.1;XM_006713060.1;XM_011533505.1;XM_011533506.1;XM_011533507.1;XM_011533508.1;XM_011533509.1;XM_011533510.1;XM_011533511.1;XM_011533512.1;XM_011533513.1;XM_011533514.1;XM_011533515.1;XM_011533516.1;XM_011533517.1
GO:1990782	protein tyrosine kinase binding	molecular_function	24	304	50	98659	7.10187e-50	3.98148e-48	155.777	NM_015097.2;XM_006713036.1;XM_006713040.1;XM_006713041.1;XM_006713042.1;XM_006713048.1;XM_006713049.1;XM_006713050.1;XM_006713052.1;XM_006713053.1;XM_006713060.1;XM_011533505.1;XM_011533506.1;XM_011533507.1;XM_011533508.1;XM_011533509.1;XM_011533510.1;XM_011533511.1;XM_011533512.1;XM_011533513.1;XM_011533514.1;XM_011533515.1;XM_011533516.1;XM_011533517.1
GO:0031110	regulation of microtubule polymerization or depolymerization	biological_process	24	304	52	98659	2.66835e-49	1.40795e-47	149.786	NM_015097.2;XM_006713036.1;XM_006713040.1;XM_006713041.1;XM_006713042.1;XM_006713048.1;XM_006713049.1;XM_006713050.1;XM_006713052.1;XM_006713053.1;XM_006713060.1;XM_011533505.1;XM_011533506.1;XM_011533507.1;XM_011533508.1;XM_011533509.1;XM_011533510.1;XM_011533511.1;XM_011533512.1;XM_011533513.1;XM_011533514.1;XM_011533515.1;XM_011533516.1;XM_011533517.1
GO:0005089	Rho guanyl-nucleotide exchange factor activity	molecular_function	45	304	648	98659	1.37186e-47	6.83642e-46	22.5372	NM_001098623.2;NM_001271223.2;NM_052843.3;XM_005273287.3;XM_005273288.3;XM_005273289.3;XM_005273290.3;XM_005273291.3;XM_005273292.3;XM_005273293.3;XM_005273294.3;XM_005273295.3;XM_005273296.3;XM_005273297.3;XM_005273298.3;XM_005273299.3;XM_005273300.3;XM_005273301.3;XM_005273302.3;XM_005273304.3;XM_005273305.3;XM_005273307.3;XM_005273309.3;XM_005273310.3;XM_006711819.2;XM_006711820.2;XM_006711821…
GO:1903690	negative regulation of wound healing, spreading of epidermal cells	biological_process	24	304	62	98659	8.01506e-47	3.78395e-45	125.627	NM_015097.2;XM_006713036.1;XM_006713040.1;XM_006713041.1;XM_006713042.1;XM_006713048.1;XM_006713049.1;XM_006713050.1;XM_006713052.1;XM_006713053.1;XM_006713060.1;XM_011533505.1;XM_011533506.1;XM_011533507.1;XM_011533508.1;XM_011533509.1;XM_011533510.1;XM_011533511.1;XM_011533512.1;XM_011533513.1;XM_011533514.1;XM_011533515.1;XM_011533516.1;XM_011533517.1
GO:0098779	mitophagy in response to mitochondrial depolarization	biological_process	46	304	754	98659	5.58006e-46	2.50266e-44	19.7993	NM_001098623.2;NM_001271223.2;NM_052843.3;NM_178191.2;XM_005273287.3;XM_005273288.3;XM_005273289.3;XM_005273290.3;XM_005273291.3;XM_005273292.3;XM_005273293.3;XM_005273294.3;XM_005273295.3;XM_005273296.3;XM_005273297.3;XM_005273298.3;XM_005273299.3;XM_005273300.3;XM_005273301.3;XM_005273302.3;XM_005273304.3;XM_005273305.3;XM_005273307.3;XM_005273309.3;XM_005273310.3;XM_006711819.2;XM_006711820.2;…
GO:0035023	regulation of Rho protein signal transduction	biological_process	45	304	715	98659	1.2473e-45	5.32776e-44	20.4254	NM_001098623.2;NM_001271223.2;NM_052843.3;XM_005273287.3;XM_005273288.3;XM_005273289.3;XM_005273290.3;XM_005273291.3;XM_005273292.3;XM_005273293.3;XM_005273294.3;XM_005273295.3;XM_005273296.3;XM_005273297.3;XM_005273298.3;XM_005273299.3;XM_005273300.3;XM_005273301.3;XM_005273302.3;XM_005273304.3;XM_005273305.3;XM_005273307.3;XM_005273309.3;XM_005273310.3;XM_006711819.2;XM_006711820.2;XM_006711821…
GO:0005828	kinetochore microtubule	cellular_component	24	304	71	98659	5.2868e-45	2.15557e-43	109.702	NM_015097.2;XM_006713036.1;XM_006713040.1;XM_006713041.1;XM_006713042.1;XM_006713048.1;XM_006713049.1;XM_006713050.1;XM_006713052.1;XM_006713053.1;XM_006713060.1;XM_011533505.1;XM_011533506.1;XM_011533507.1;XM_011533508.1;XM_011533509.1;XM_011533510.1;XM_011533511.1;XM_011533512.1;XM_011533513.1;XM_011533514.1;XM_011533515.1;XM_011533516.1;XM_011533517.1
GO:0031113	regulation of microtubule polymerization	biological_process	24	304	75	98659	2.75996e-44	1.07639e-42	103.852	NM_015097.2;XM_006713036.1;XM_006713040.1;XM_006713041.1;XM_006713042.1;XM_006713048.1;XM_006713049.1;XM_006713050.1;XM_006713052.1;XM_006713053.1;XM_006713060.1;XM_011533505.1;XM_011533506.1;XM_011533507.1;XM_011533508.1;XM_011533509.1;XM_011533510.1;XM_011533511.1;XM_011533512.1;XM_011533513.1;XM_011533514.1;XM_011533515.1;XM_011533516.1;XM_011533517.1
GO:0090091	positive regulation of extracellular matrix disassembly	biological_process	24	304	76	98659	4.1017e-44	1.53301e-42	102.485	NM_015097.2;XM_006713036.1;XM_006713040.1;XM_006713041.1;XM_006713042.1;XM_006713048.1;XM_006713049.1;XM_006713050.1;XM_006713052.1;XM_006713053.1;XM_006713060.1;XM_011533505.1;XM_011533506.1;XM_011533507.1;XM_011533508.1;XM_011533509.1;XM_011533510.1;XM_011533511.1;XM_011533512.1;XM_011533513.1;XM_011533514.1;XM_011533515.1;XM_011533516.1;XM_011533517.1
GO:0006903	vesicle targeting	biological_process	24	304	84	98659	7.89002e-43	2.83094e-41	92.7246	NM_015097.2;XM_006713036.1;XM_006713040.1;XM_006713041.1;XM_006713042.1;XM_006713048.1;XM_006713049.1;XM_006713050.1;XM_006713052.1;XM_006713053.1;XM_006713060.1;XM_011533505.1;XM_011533506.1;XM_011533507.1;XM_011533508.1;XM_011533509.1;XM_011533510.1;XM_011533511.1;XM_011533512.1;XM_011533513.1;XM_011533514.1;XM_011533515.1;XM_011533516.1;XM_011533517.1
GO:0030018	Z disc	cellular_component	45	304	867	98659	7.78202e-42	2.6848e-40	16.8444	NM_001098623.2;NM_001271223.2;NM_052843.3;XM_005273287.3;XM_005273288.3;XM_005273289.3;XM_005273290.3;XM_005273291.3;XM_005273292.3;XM_005273293.3;XM_005273294.3;XM_005273295.3;XM_005273296.3;XM_005273297.3;XM_005273298.3;XM_005273299.3;XM_005273300.3;XM_005273301.3;XM_005273302.3;XM_005273304.3;XM_005273305.3;XM_005273307.3;XM_005273309.3;XM_005273310.3;XM_006711819.2;XM_006711820.2;XM_006711821…
GO:0005085	guanyl-nucleotide exchange factor activity	molecular_function	45	304	875	98659	1.17632e-41	3.90798e-40	16.6904	NM_001098623.2;NM_001271223.2;NM_052843.3;XM_005273287.3;XM_005273288.3;XM_005273289.3;XM_005273290.3;XM_005273291.3;XM_005273292.3;XM_005273293.3;XM_005273294.3;XM_005273295.3;XM_005273296.3;XM_005273297.3;XM_005273298.3;XM_005273299.3;XM_005273300.3;XM_005273301.3;XM_005273302.3;XM_005273304.3;XM_005273305.3;XM_005273307.3;XM_005273309.3;XM_005273310.3;XM_006711819.2;XM_006711820.2;XM_006711821…
GO:0051010	microtubule plus-end binding	molecular_function	24	304	97	98659	5.0059e-41	1.60367e-39	80.2976	NM_015097.2;XM_006713036.1;XM_006713040.1;XM_006713041.1;XM_006713042.1;XM_006713048.1;XM_006713049.1;XM_006713050.1;XM_006713052.1;XM_006713053.1;XM_006713060.1;XM_011533505.1;XM_011533506.1;XM_011533507.1;XM_011533508.1;XM_011533509.1;XM_011533510.1;XM_011533511.1;XM_011533512.1;XM_011533513.1;XM_011533514.1;XM_011533515.1;XM_011533516.1;XM_011533517.1
GO:0032886	regulation of microtubule-based process	biological_process	24	304	100	98659	1.18899e-40	3.55804e-39	77.8887	NM_015097.2;XM_006713036.1;XM_006713040.1;XM_006713041.1;XM_006713042.1;XM_006713048.1;XM_006713049.1;XM_006713050.1;XM_006713052.1;XM_006713053.1;XM_006713060.1;XM_011533505.1;XM_011533506.1;XM_011533507.1;XM_011533508.1;XM_011533509.1;XM_011533510.1;XM_011533511.1;XM_011533512.1;XM_011533513.1;XM_011533514.1;XM_011533515.1;XM_011533516.1;XM_011533517.1
GO:0031252	cell leading edge	cellular_component	31	304	268	98659	1.18998e-40	3.55804e-39	37.5396	NM_015097.2;XM_006713036.1;XM_006713040.1;XM_006713041.1;XM_006713042.1;XM_006713048.1;XM_006713049.1;XM_006713050.1;XM_006713052.1;XM_006713053.1;XM_006713060.1;XM_011533505.1;XM_011533506.1;XM_011533507.1;XM_011533508.1;XM_011533509.1;XM_011533510.1;XM_011533511.1;XM_011533512.1;XM_011533513.1;XM_011533514.1;XM_011533515.1;XM_011533516.1;XM_011533517.1;XM_011541773.1;XM_011541774.1;XM_011541776…
GO:0010458	exit from mitosis	biological_process	24	304	102	98659	2.08175e-40	5.8354e-39	76.3615	NM_015097.2;XM_006713036.1;XM_006713040.1;XM_006713041.1;XM_006713042.1;XM_006713048.1;XM_006713049.1;XM_006713050.1;XM_006713052.1;XM_006713053.1;XM_006713060.1;XM_011533505.1;XM_011533506.1;XM_011533507.1;XM_011533508.1;XM_011533509.1;XM_011533510.1;XM_011533511.1;XM_011533512.1;XM_011533513.1;XM_011533514.1;XM_011533515.1;XM_011533516.1;XM_011533517.1
GO:0030516	regulation of axon extension	biological_process	24	304	102	98659	2.08175e-40	5.8354e-39	76.3615	NM_015097.2;XM_006713036.1;XM_006713040.1;XM_006713041.1;XM_006713042.1;XM_006713048.1;XM_006713049.1;XM_006713050.1;XM_006713052.1;XM_006713053.1;XM_006713060.1;XM_011533505.1;XM_011533506.1;XM_011533507.1;XM_011533508.1;XM_011533509.1;XM_011533510.1;XM_011533511.1;XM_011533512.1;XM_011533513.1;XM_011533514.1;XM_011533515.1;XM_011533516.1;XM_011533517.1
GO:0045180	basal cortex	cellular_component	24	304	106	98659	6.14842e-40	1.67125e-38	73.4799	NM_015097.2;XM_006713036.1;XM_006713040.1;XM_006713041.1;XM_006713042.1;XM_006713048.1;XM_006713049.1;XM_006713050.1;XM_006713052.1;XM_006713053.1;XM_006713060.1;XM_011533505.1;XM_011533506.1;XM_011533507.1;XM_011533508.1;XM_011533509.1;XM_011533510.1;XM_011533511.1;XM_011533512.1;XM_011533513.1;XM_011533514.1;XM_011533515.1;XM_011533516.1;XM_011533517.1
GO:1904261	positive regulation of basement membrane assembly involved in embryonic body morphogenesis	biological_process	24	304	111	98659	2.23207e-39	5.88873e-38	70.17	NM_015097.2;XM_006713036.1;XM_006713040.1;XM_006713041.1;XM_006713042.1;XM_006713048.1;XM_006713049.1;XM_006713050.1;XM_006713052.1;XM_006713053.1;XM_006713060.1;XM_011533505.1;XM_011533506.1;XM_011533507.1;XM_011533508.1;XM_011533509.1;XM_011533510.1;XM_011533511.1;XM_011533512.1;XM_011533513.1;XM_011533514.1;XM_011533515.1;XM_011533516.1;XM_011533517.1
GO:0031023	microtubule organizing center organization	biological_process	24	304	114	98659	4.68778e-39	1.20141e-37	68.3234	NM_015097.2;XM_006713036.1;XM_006713040.1;XM_006713041.1;XM_006713042.1;XM_006713048.1;XM_006713049.1;XM_006713050.1;XM_006713052.1;XM_006713053.1;XM_006713060.1;XM_011533505.1;XM_011533506.1;XM_011533507.1;XM_011533508.1;XM_011533509.1;XM_011533510.1;XM_011533511.1;XM_011533512.1;XM_011533513.1;XM_011533514.1;XM_011533515.1;XM_011533516.1;XM_011533517.1
GO:0051497	negative regulation of stress fiber assembly	biological_process	24	304	120	98659	1.93826e-38	4.8295e-37	64.9072	NM_015097.2;XM_006713036.1;XM_006713040.1;XM_006713041.1;XM_006713042.1;XM_006713048.1;XM_006713049.1;XM_006713050.1;XM_006713052.1;XM_006713053.1;XM_006713060.1;XM_011533505.1;XM_011533506.1;XM_011533507.1;XM_011533508.1;XM_011533509.1;XM_011533510.1;XM_011533511.1;XM_011533512.1;XM_011533513.1;XM_011533514.1;XM_011533515.1;XM_011533516.1;XM_011533517.1
GO:0043065	positive regulation of apoptotic process	biological_process	55	304	1809	98659	2.0925e-38	5.0729e-37	9.86705	NM_001098623.2;NM_001144772.1;NM_001271223.2;NM_001291428.1;NM_001291431.1;NM_052843.3;NM_138761.3;NM_138763.3;NM_138764.4;XM_005273287.3;XM_005273288.3;XM_005273289.3;XM_005273290.3;XM_005273291.3;XM_005273292.3;XM_005273293.3;XM_005273294.3;XM_005273295.3;XM_005273296.3;XM_005273297.3;XM_005273298.3;XM_005273299.3;XM_005273300.3;XM_005273301.3;XM_005273302.3;XM_005273304.3;XM_005273305.3;XM_005…
GO:0010470	regulation of gastrulation	biological_process	24	304	129	98659	1.41065e-37	3.32988e-36	60.3788	NM_015097.2;XM_006713036.1;XM_006713040.1;XM_006713041.1;XM_006713042.1;XM_006713048.1;XM_006713049.1;XM_006713050.1;XM_006713052.1;XM_006713053.1;XM_006713060.1;XM_011533505.1;XM_011533506.1;XM_011533507.1;XM_011533508.1;XM_011533509.1;XM_011533510.1;XM_011533511.1;XM_011533512.1;XM_011533513.1;XM_011533514.1;XM_011533515.1;XM_011533516.1;XM_011533517.1
GO:0051895	negative regulation of focal adhesion assembly	biological_process	24	304	135	98659	4.86716e-37	1.11945e-35	57.6953	NM_015097.2;XM_006713036.1;XM_006713040.1;XM_006713041.1;XM_006713042.1;XM_006713048.1;XM_006713049.1;XM_006713050.1;XM_006713052.1;XM_006713053.1;XM_006713060.1;XM_011533505.1;XM_011533506.1;XM_011533507.1;XM_011533508.1;XM_011533509.1;XM_011533510.1;XM_011533511.1;XM_011533512.1;XM_011533513.1;XM_011533514.1;XM_011533515.1;XM_011533516.1;XM_011533517.1
GO:0051056	regulation of small GTPase mediated signal transduction	biological_process	45	304	1115	98659	5.72076e-37	1.28288e-35	13.0979	NM_001098623.2;NM_001271223.2;NM_052843.3;XM_005273287.3;XM_005273288.3;XM_005273289.3;XM_005273290.3;XM_005273291.3;XM_005273292.3;XM_005273293.3;XM_005273294.3;XM_005273295.3;XM_005273296.3;XM_005273297.3;XM_005273298.3;XM_005273299.3;XM_005273300.3;XM_005273301.3;XM_005273302.3;XM_005273304.3;XM_005273305.3;XM_005273307.3;XM_005273309.3;XM_005273310.3;XM_006711819.2;XM_006711820.2;XM_006711821…
GO:0002162	dystroglycan binding	molecular_function	24	304	137	98659	7.25483e-37	1.58722e-35	56.8531	NM_015097.2;XM_006713036.1;XM_006713040.1;XM_006713041.1;XM_006713042.1;XM_006713048.1;XM_006713049.1;XM_006713050.1;XM_006713052.1;XM_006713053.1;XM_006713060.1;XM_011533505.1;XM_011533506.1;XM_011533507.1;XM_011533508.1;XM_011533509.1;XM_011533510.1;XM_011533511.1;XM_011533512.1;XM_011533513.1;XM_011533514.1;XM_011533515.1;XM_011533516.1;XM_011533517.1
GO:0005516	calmodulin binding	molecular_function	47	304	1299	98659	2.22902e-36	4.76054e-35	11.7423	NM_001098623.2;NM_001271223.2;NM_052843.3;NM_178191.2;XM_005273287.3;XM_005273288.3;XM_005273289.3;XM_005273290.3;XM_005273291.3;XM_005273292.3;XM_005273293.3;XM_005273294.3;XM_005273295.3;XM_005273296.3;XM_005273297.3;XM_005273298.3;XM_005273299.3;XM_005273300.3;XM_005273301.3;XM_005273302.3;XM_005273304.3;XM_005273305.3;XM_005273307.3;XM_005273309.3;XM_005273310.3;XM_006711819.2;XM_006711820.2;…
GO:0010717	regulation of epithelial to mesenchymal transition	biological_process	24	304	156	98659	2.39291e-35	4.99173e-34	49.9286	NM_015097.2;XM_006713036.1;XM_006713040.1;XM_006713041.1;XM_006713042.1;XM_006713048.1;XM_006713049.1;XM_006713050.1;XM_006713052.1;XM_006713053.1;XM_006713060.1;XM_011533505.1;XM_011533506.1;XM_011533507.1;XM_011533508.1;XM_011533509.1;XM_011533510.1;XM_011533511.1;XM_011533512.1;XM_011533513.1;XM_011533514.1;XM_011533515.1;XM_011533516.1;XM_011533517.1
GO:0034453	microtubule anchoring	biological_process	24	304	159	98659	3.97923e-35	8.1122e-34	48.9866	NM_015097.2;XM_006713036.1;XM_006713040.1;XM_006713041.1;XM_006713042.1;XM_006713048.1;XM_006713049.1;XM_006713050.1;XM_006713052.1;XM_006713053.1;XM_006713060.1;XM_011533505.1;XM_011533506.1;XM_011533507.1;XM_011533508.1;XM_011533509.1;XM_011533510.1;XM_011533511.1;XM_011533512.1;XM_011533513.1;XM_011533514.1;XM_011533515.1;XM_011533516.1;XM_011533517.1
GO:0007026	negative regulation of microtubule depolymerization	biological_process	24	304	164	98659	9.07581e-35	1.80911e-33	47.4931	NM_015097.2;XM_006713036.1;XM_006713040.1;XM_006713041.1;XM_006713042.1;XM_006713048.1;XM_006713049.1;XM_006713050.1;XM_006713052.1;XM_006713053.1;XM_006713060.1;XM_011533505.1;XM_011533506.1;XM_011533507.1;XM_011533508.1;XM_011533509.1;XM_011533510.1;XM_011533511.1;XM_011533512.1;XM_011533513.1;XM_011533514.1;XM_011533515.1;XM_011533516.1;XM_011533517.1
GO:0044295	axonal growth cone	cellular_component	25	304	200	98659	3.22568e-34	6.29008e-33	40.567	NM_001083607.1;NM_015097.2;XM_006713036.1;XM_006713040.1;XM_006713041.1;XM_006713042.1;XM_006713048.1;XM_006713049.1;XM_006713050.1;XM_006713052.1;XM_006713053.1;XM_006713060.1;XM_011533505.1;XM_011533506.1;XM_011533507.1;XM_011533508.1;XM_011533509.1;XM_011533510.1;XM_011533511.1;XM_011533512.1;XM_011533513.1;XM_011533514.1;XM_011533515.1;XM_011533516.1;XM_011533517.1
GO:0007020	microtubule nucleation	biological_process	24	304	173	98659	3.74215e-34	7.14194e-33	45.0224	NM_015097.2;XM_006713036.1;XM_006713040.1;XM_006713041.1;XM_006713042.1;XM_006713048.1;XM_006713049.1;XM_006713050.1;XM_006713052.1;XM_006713053.1;XM_006713060.1;XM_011533505.1;XM_011533506.1;XM_011533507.1;XM_011533508.1;XM_011533509.1;XM_011533510.1;XM_011533511.1;XM_011533512.1;XM_011533513.1;XM_011533514.1;XM_011533515.1;XM_011533516.1;XM_011533517.1
GO:0045921	positive regulation of exocytosis	biological_process	24	304	185	98659	2.19222e-33	4.09671e-32	42.102	NM_015097.2;XM_006713036.1;XM_006713040.1;XM_006713041.1;XM_006713042.1;XM_006713048.1;XM_006713049.1;XM_006713050.1;XM_006713052.1;XM_006713053.1;XM_006713060.1;XM_011533505.1;XM_011533506.1;XM_011533507.1;XM_011533508.1;XM_011533509.1;XM_011533510.1;XM_011533511.1;XM_011533512.1;XM_011533513.1;XM_011533514.1;XM_011533515.1;XM_011533516.1;XM_011533517.1
GO:0010634	positive regulation of epithelial cell migration	biological_process	24	304	200	98659	1.68798e-32	3.09004e-31	38.9443	NM_015097.2;XM_006713036.1;XM_006713040.1;XM_006713041.1;XM_006713042.1;XM_006713048.1;XM_006713049.1;XM_006713050.1;XM_006713052.1;XM_006713053.1;XM_006713060.1;XM_011533505.1;XM_011533506.1;XM_011533507.1;XM_011533508.1;XM_011533509.1;XM_011533510.1;XM_011533511.1;XM_011533512.1;XM_011533513.1;XM_011533514.1;XM_011533515.1;XM_011533516.1;XM_011533517.1
GO:0004674	protein serine/threonine kinase activity	molecular_function	55	304	2458	98659	1.46309e-31	2.62479e-30	7.26179	NM_001098623.2;NM_001122957.2;NM_001271223.2;NM_001271926.1;NM_005881.3;NM_052843.3;XM_005273287.3;XM_005273288.3;XM_005273289.3;XM_005273290.3;XM_005273291.3;XM_005273292.3;XM_005273293.3;XM_005273294.3;XM_005273295.3;XM_005273296.3;XM_005273297.3;XM_005273298.3;XM_005273299.3;XM_005273300.3;XM_005273301.3;XM_005273302.3;XM_005273304.3;XM_005273305.3;XM_005273307.3;XM_005273309.3;XM_005273310.3;…
GO:0007052	mitotic spindle organization	biological_process	24	304	219	98659	1.78479e-31	3.13912e-30	35.5656	NM_015097.2;XM_006713036.1;XM_006713040.1;XM_006713041.1;XM_006713042.1;XM_006713048.1;XM_006713049.1;XM_006713050.1;XM_006713052.1;XM_006713053.1;XM_006713060.1;XM_011533505.1;XM_011533506.1;XM_011533507.1;XM_011533508.1;XM_011533509.1;XM_011533510.1;XM_011533511.1;XM_011533512.1;XM_011533513.1;XM_011533514.1;XM_011533515.1;XM_011533516.1;XM_011533517.1
GO:0090002	establishment of protein localization to plasma membrane	biological_process	24	304	227	98659	4.51126e-31	7.78192e-30	34.3122	NM_015097.2;XM_006713036.1;XM_006713040.1;XM_006713041.1;XM_006713042.1;XM_006713048.1;XM_006713049.1;XM_006713050.1;XM_006713052.1;XM_006713053.1;XM_006713060.1;XM_011533505.1;XM_011533506.1;XM_011533507.1;XM_011533508.1;XM_011533509.1;XM_011533510.1;XM_011533511.1;XM_011533512.1;XM_011533513.1;XM_011533514.1;XM_011533515.1;XM_011533516.1;XM_011533517.1
GO:0007163	establishment or maintenance of cell polarity	biological_process	24	304	250	98659	5.39074e-30	9.12356e-29	31.1555	NM_015097.2;XM_006713036.1;XM_006713040.1;XM_006713041.1;XM_006713042.1;XM_006713048.1;XM_006713049.1;XM_006713050.1;XM_006713052.1;XM_006713053.1;XM_006713060.1;XM_011533505.1;XM_011533506.1;XM_011533507.1;XM_011533508.1;XM_011533509.1;XM_011533510.1;XM_011533511.1;XM_011533512.1;XM_011533513.1;XM_011533514.1;XM_011533515.1;XM_011533516.1;XM_011533517.1
GO:0044380	protein localization to cytoskeleton	biological_process	11	304	13	98659	7.62761e-30	1.26703e-28	274.608	NM_198488.3;XM_005250887.2;XM_005250888.2;XM_005250889.2;XM_006725087.2;XM_006725088.2;XM_006725089.2;XM_011516980.1;XM_011516981.1;XM_011546532.1;XM_011546533.1
GO:0000226	microtubule cytoskeleton organization	biological_process	31	304	581	98659	8.38318e-30	1.36722e-28	17.316	NM_015097.2;XM_006713036.1;XM_006713040.1;XM_006713041.1;XM_006713042.1;XM_006713048.1;XM_006713049.1;XM_006713050.1;XM_006713052.1;XM_006713053.1;XM_006713060.1;XM_011533505.1;XM_011533506.1;XM_011533507.1;XM_011533508.1;XM_011533509.1;XM_011533510.1;XM_011533511.1;XM_011533512.1;XM_011533513.1;XM_011533514.1;XM_011533515.1;XM_011533516.1;XM_011533517.1;XM_011541773.1;XM_011541774.1;XM_011541776…
GO:0032956	regulation of actin cytoskeleton organization	biological_process	24	304	260	98659	1.46915e-29	2.35327e-28	29.9572	NM_015097.2;XM_006713036.1;XM_006713040.1;XM_006713041.1;XM_006713042.1;XM_006713048.1;XM_006713049.1;XM_006713050.1;XM_006713052.1;XM_006713053.1;XM_006713060.1;XM_011533505.1;XM_011533506.1;XM_011533507.1;XM_011533508.1;XM_011533509.1;XM_011533510.1;XM_011533511.1;XM_011533512.1;XM_011533513.1;XM_011533514.1;XM_011533515.1;XM_011533516.1;XM_011533517.1
GO:0006468	protein phosphorylation	biological_process	58	304	3109	98659	4.16828e-29	6.55955e-28	6.05439	NM_001098623.2;NM_001122957.2;NM_001164760.1;NM_001243079.1;NM_001271223.2;NM_001271926.1;NM_005881.3;NM_052843.3;XM_005273287.3;XM_005273288.3;XM_005273289.3;XM_005273290.3;XM_005273291.3;XM_005273292.3;XM_005273293.3;XM_005273294.3;XM_005273295.3;XM_005273296.3;XM_005273297.3;XM_005273298.3;XM_005273299.3;XM_005273300.3;XM_005273301.3;XM_005273302.3;XM_005273304.3;XM_005273305.3;XM_005273307.3;…
GO:0005881	cytoplasmic microtubule	cellular_component	24	304	333	98659	7.65201e-27	1.18342e-25	23.39	NM_015097.2;XM_006713036.1;XM_006713040.1;XM_006713041.1;XM_006713042.1;XM_006713048.1;XM_006713049.1;XM_006713050.1;XM_006713052.1;XM_006713053.1;XM_006713060.1;XM_011533505.1;XM_011533506.1;XM_011533507.1;XM_011533508.1;XM_011533509.1;XM_011533510.1;XM_011533511.1;XM_011533512.1;XM_011533513.1;XM_011533514.1;XM_011533515.1;XM_011533516.1;XM_011533517.1
GO:0004830	tryptophan-tRNA ligase activity	molecular_function	11	304	18	98659	1.07442e-26	1.60626e-25	198.328	NM_004184.3;NM_173701.1;NM_213645.1;NM_213646.1;XM_005268044.2;XM_006720249.2;XM_011537133.1;XM_011537134.1;XM_011537135.1;XM_011537136.1;XM_011537137.1
GO:0006436	tryptophanyl-tRNA aminoacylation	biological_process	11	304	18	98659	1.07442e-26	1.60626e-25	198.328	NM_004184.3;NM_173701.1;NM_213645.1;NM_213646.1;XM_005268044.2;XM_006720249.2;XM_011537133.1;XM_011537134.1;XM_011537135.1;XM_011537136.1;XM_011537137.1
GO:1904320	positive regulation of smooth muscle contraction involved in micturition	biological_process	10	304	14	98659	7.1516e-26	9.43381e-25	231.812	NM_001126044.1;NM_198714.1;NM_198715.2;NM_198716.1;NM_198717.1;NM_198718.1;NM_198719.1;XM_011541809.1;XM_011541810.1;XM_011541811.1
GO:1904325	positive regulation of inhibitory G-protein coupled receptor phosphorylation	biological_process	10	304	14	98659	7.1516e-26	9.43381e-25	231.812	NM_001126044.1;NM_198714.1;NM_198715.2;NM_198716.1;NM_198717.1;NM_198718.1;NM_198719.1;XM_011541809.1;XM_011541810.1;XM_011541811.1
GO:1904326	negative regulation of circadian sleep/wake cycle, wakefulness	biological_process	10	304	14	98659	7.1516e-26	9.43381e-25	231.812	NM_001126044.1;NM_198714.1;NM_198715.2;NM_198716.1;NM_198717.1;NM_198718.1;NM_198719.1;XM_011541809.1;XM_011541810.1;XM_011541811.1
GO:1904330	positive regulation of myofibroblast contraction	biological_process	10	304	14	98659	7.1516e-26	9.43381e-25	231.812	NM_001126044.1;NM_198714.1;NM_198715.2;NM_198716.1;NM_198717.1;NM_198718.1;NM_198719.1;XM_011541809.1;XM_011541810.1;XM_011541811.1
GO:1904343	positive regulation of colon smooth muscle contraction	biological_process	10	304	14	98659	7.1516e-26	9.43381e-25	231.812	NM_001126044.1;NM_198714.1;NM_198715.2;NM_198716.1;NM_198717.1;NM_198718.1;NM_198719.1;XM_011541809.1;XM_011541810.1;XM_011541811.1
GO:1904346	positive regulation of gastric mucosal blood circulation	biological_process	10	304	14	98659	7.1516e-26	9.43381e-25	231.812	NM_001126044.1;NM_198714.1;NM_198715.2;NM_198716.1;NM_198717.1;NM_198718.1;NM_198719.1;XM_011541809.1;XM_011541810.1;XM_011541811.1
GO:1990767	prostaglandin receptor internalization	biological_process	10	304	14	98659	7.1516e-26	9.43381e-25	231.812	NM_001126044.1;NM_198714.1;NM_198715.2;NM_198716.1;NM_198717.1;NM_198718.1;NM_198719.1;XM_011541809.1;XM_011541810.1;XM_011541811.1
GO:1990769	proximal neuron projection	cellular_component	10	304	14	98659	7.1516e-26	9.43381e-25	231.812	NM_001126044.1;NM_198714.1;NM_198715.2;NM_198716.1;NM_198717.1;NM_198718.1;NM_198719.1;XM_011541809.1;XM_011541810.1;XM_011541811.1
GO:1990254	keratin filament binding	molecular_function	11	304	22	98659	3.70184e-25	4.81239e-24	162.268	NM_198488.3;XM_005250887.2;XM_005250888.2;XM_005250889.2;XM_006725087.2;XM_006725088.2;XM_006725089.2;XM_011516980.1;XM_011516981.1;XM_011546532.1;XM_011546533.1
GO:1903170	negative regulation of calcium ion transmembrane transport	biological_process	10	304	16	98659	8.53526e-25	1.07833e-23	202.835	NM_001126044.1;NM_198714.1;NM_198715.2;NM_198716.1;NM_198717.1;NM_198718.1;NM_198719.1;XM_011541809.1;XM_011541810.1;XM_011541811.1
GO:1903640	negative regulation of gastrin-induced gastric acid secretion	biological_process	10	304	16	98659	8.53526e-25	1.07833e-23	202.835	NM_001126044.1;NM_198714.1;NM_198715.2;NM_198716.1;NM_198717.1;NM_198718.1;NM_198719.1;XM_011541809.1;XM_011541810.1;XM_011541811.1
GO:0000776	kinetochore	cellular_component	24	304	433	98659	5.13844e-24	6.40165e-23	17.9881	NM_015097.2;XM_006713036.1;XM_006713040.1;XM_006713041.1;XM_006713042.1;XM_006713048.1;XM_006713049.1;XM_006713050.1;XM_006713052.1;XM_006713053.1;XM_006713060.1;XM_011533505.1;XM_011533506.1;XM_011533507.1;XM_011533508.1;XM_011533509.1;XM_011533510.1;XM_011533511.1;XM_011533512.1;XM_011533513.1;XM_011533514.1;XM_011533515.1;XM_011533516.1;XM_011533517.1
GO:0008017	microtubule binding	molecular_function	37	304	1414	98659	5.32281e-24	6.54049e-23	8.49211	NM_001242902.1;NM_001242903.1;NM_003488.3;NM_015097.2;NM_021020.3;XM_005257707.1;XM_005257709.1;XM_005273394.3;XM_006713036.1;XM_006713040.1;XM_006713041.1;XM_006713042.1;XM_006713048.1;XM_006713049.1;XM_006713050.1;XM_006713052.1;XM_006713053.1;XM_006713060.1;XM_011525318.1;XM_011533505.1;XM_011533506.1;XM_011533507.1;XM_011533508.1;XM_011533509.1;XM_011533510.1;XM_011533511.1;XM_011533512.1;XM_…
GO:2000978	negative regulation of forebrain neuron differentiation	biological_process	10	304	18	98659	6.18473e-24	7.4969e-23	180.298	NM_001126044.1;NM_198714.1;NM_198715.2;NM_198716.1;NM_198717.1;NM_198718.1;NM_198719.1;XM_011541809.1;XM_011541810.1;XM_011541811.1
GO:0007275	multicellular organism development	biological_process	49	304	2760	98659	8.8075e-24	1.05338e-22	5.76169	NM_001098623.2;NM_001271223.2;NM_015898.2;NM_052843.3;XM_005259570.3;XM_005259571.3;XM_005259572.2;XM_005273287.3;XM_005273288.3;XM_005273289.3;XM_005273290.3;XM_005273291.3;XM_005273292.3;XM_005273293.3;XM_005273294.3;XM_005273295.3;XM_005273296.3;XM_005273297.3;XM_005273298.3;XM_005273299.3;XM_005273300.3;XM_005273301.3;XM_005273302.3;XM_005273304.3;XM_005273305.3;XM_005273307.3;XM_005273309.3;…
GO:0072686	mitotic spindle	cellular_component	24	304	448	98659	1.18377e-23	1.39716e-22	17.3859	NM_015097.2;XM_006713036.1;XM_006713040.1;XM_006713041.1;XM_006713042.1;XM_006713048.1;XM_006713049.1;XM_006713050.1;XM_006713052.1;XM_006713053.1;XM_006713060.1;XM_011533505.1;XM_011533506.1;XM_011533507.1;XM_011533508.1;XM_011533509.1;XM_011533510.1;XM_011533511.1;XM_011533512.1;XM_011533513.1;XM_011533514.1;XM_011533515.1;XM_011533516.1;XM_011533517.1
GO:0014827	intestine smooth muscle contraction	biological_process	10	304	20	98659	3.24642e-23	3.78186e-22	162.268	NM_001126044.1;NM_198714.1;NM_198715.2;NM_198716.1;NM_198717.1;NM_198718.1;NM_198719.1;XM_011541809.1;XM_011541810.1;XM_011541811.1
GO:0000777	condensed chromosome kinetochore	cellular_component	24	304	482	98659	7.05413e-23	8.11225e-22	16.1595	NM_015097.2;XM_006713036.1;XM_006713040.1;XM_006713041.1;XM_006713042.1;XM_006713048.1;XM_006713049.1;XM_006713050.1;XM_006713052.1;XM_006713053.1;XM_006713060.1;XM_011533505.1;XM_011533506.1;XM_011533507.1;XM_011533508.1;XM_011533509.1;XM_011533510.1;XM_011533511.1;XM_011533512.1;XM_011533513.1;XM_011533514.1;XM_011533515.1;XM_011533516.1;XM_011533517.1
GO:0005815	microtubule organizing center	cellular_component	32	304	1070	98659	9.01703e-23	1.02383e-21	9.70576	NM_015097.2;XM_006713036.1;XM_006713040.1;XM_006713041.1;XM_006713042.1;XM_006713048.1;XM_006713049.1;XM_006713050.1;XM_006713052.1;XM_006713053.1;XM_006713060.1;XM_011513250.1;XM_011533505.1;XM_011533506.1;XM_011533507.1;XM_011533508.1;XM_011533509.1;XM_011533510.1;XM_011533511.1;XM_011533512.1;XM_011533513.1;XM_011533514.1;XM_011533515.1;XM_011533516.1;XM_011533517.1;XM_011541773.1;XM_011541774…
GO:0005829	cytosol	cellular_component	135	304	20100	98659	8.72746e-22	9.78567e-21	2.17972	NM_000377.2;NM_001042476.2;NM_001098623.2;NM_001144772.1;NM_001145412.2;NM_001145413.2;NM_001161441.1;NM_001161442.1;NM_001161443.1;NM_001161444.1;NM_001164760.1;NM_001186.3;NM_001242902.1;NM_001242903.1;NM_001271223.2;NM_001278260.1;NM_001278261.1;NM_001278262.1;NM_001278263.1;NM_001278264.1;NM_001278265.1;NM_001278266.1;NM_001291428.1;NM_001291431.1;NM_003488.3;NM_003975.3;NM_004184.3;NM_014316…
GO:0007030	Golgi organization	biological_process	24	304	572	98659	4.40887e-21	4.88241e-20	13.6169	NM_015097.2;XM_006713036.1;XM_006713040.1;XM_006713041.1;XM_006713042.1;XM_006713048.1;XM_006713049.1;XM_006713050.1;XM_006713052.1;XM_006713053.1;XM_006713060.1;XM_011533505.1;XM_011533506.1;XM_011533507.1;XM_011533508.1;XM_011533509.1;XM_011533510.1;XM_011533511.1;XM_011533512.1;XM_011533513.1;XM_011533514.1;XM_011533515.1;XM_011533516.1;XM_011533517.1
GO:0004957	prostaglandin E receptor activity	molecular_function	10	304	30	98659	1.02747e-20	1.12395e-19	108.179	NM_001126044.1;NM_198714.1;NM_198715.2;NM_198716.1;NM_198717.1;NM_198718.1;NM_198719.1;XM_011541809.1;XM_011541810.1;XM_011541811.1
GO:2000391	positive regulation of neutrophil extravasation	biological_process	10	304	31	98659	1.58824e-20	1.69735e-19	104.689	NM_001126044.1;NM_198714.1;NM_198715.2;NM_198716.1;NM_198717.1;NM_198718.1;NM_198719.1;XM_011541809.1;XM_011541810.1;XM_011541811.1
GO:0000177	cytoplasmic exosome (RNase complex)	cellular_component	12	304	63	98659	1.58949e-20	1.69735e-19	61.8164	NM_001042476.2;NM_001278260.1;NM_001278261.1;NM_001278262.1;NM_001278263.1;NM_001278264.1;NM_001278265.1;NM_001278266.1;NM_014316.3;XM_005255228.3;XM_005255229.3;XM_011522444.1
GO:0032587	ruffle membrane	cellular_component	24	304	610	98659	2.05201e-20	2.16548e-19	12.7686	NM_015097.2;XM_006713036.1;XM_006713040.1;XM_006713041.1;XM_006713042.1;XM_006713048.1;XM_006713049.1;XM_006713050.1;XM_006713052.1;XM_006713053.1;XM_006713060.1;XM_011533505.1;XM_011533506.1;XM_011533507.1;XM_011533508.1;XM_011533509.1;XM_011533510.1;XM_011533511.1;XM_011533512.1;XM_011533513.1;XM_011533514.1;XM_011533515.1;XM_011533516.1;XM_011533517.1
GO:0007062	sister chromatid cohesion	biological_process	24	304	618	98659	2.79894e-20	2.91936e-19	12.6033	NM_015097.2;XM_006713036.1;XM_006713040.1;XM_006713041.1;XM_006713042.1;XM_006713048.1;XM_006713049.1;XM_006713050.1;XM_006713052.1;XM_006713053.1;XM_006713060.1;XM_011533505.1;XM_011533506.1;XM_011533507.1;XM_011533508.1;XM_011533509.1;XM_011533510.1;XM_011533511.1;XM_011533512.1;XM_011533513.1;XM_011533514.1;XM_011533515.1;XM_011533516.1;XM_011533517.1
GO:0003940	L-iduronidase activity	molecular_function	7	304	9	98659	6.64916e-20	6.627e-19	252.417	NM_000203.4;XM_006713882.2;XM_011513459.1;XM_011513460.1;XM_011513461.1;XM_011513462.1;XM_011513463.1
GO:0005984	disaccharide metabolic process	biological_process	7	304	9	98659	6.64916e-20	6.627e-19	252.417	NM_000203.4;XM_006713882.2;XM_011513459.1;XM_011513460.1;XM_011513461.1;XM_011513462.1;XM_011513463.1
GO:0030209	dermatan sulfate catabolic process	biological_process	7	304	9	98659	6.64916e-20	6.627e-19	252.417	NM_000203.4;XM_006713882.2;XM_011513459.1;XM_011513460.1;XM_011513461.1;XM_011513462.1;XM_011513463.1
GO:0015377	cation:chloride symporter activity	molecular_function	7	304	9	98659	6.64916e-20	6.627e-19	252.417	NM_001267812.1;NM_001267814.1;NM_020246.3;XM_005250502.2;XM_006716054.2;XM_006716055.2;XM_011516414.1
GO:0046010	positive regulation of circadian sleep/wake cycle, non-REM sleep	biological_process	10	304	39	98659	3.07605e-19	3.03211e-18	83.2144	NM_001126044.1;NM_198714.1;NM_198715.2;NM_198716.1;NM_198717.1;NM_198718.1;NM_198719.1;XM_011541809.1;XM_011541810.1;XM_011541811.1
GO:0010700	negative regulation of norepinephrine secretion	biological_process	10	304	41	98659	5.76702e-19	5.56238e-18	79.1552	NM_001126044.1;NM_198714.1;NM_198715.2;NM_198716.1;NM_198717.1;NM_198718.1;NM_198719.1;XM_011541809.1;XM_011541810.1;XM_011541811.1
GO:0031622	positive regulation of fever generation	biological_process	10	304	41	98659	5.76702e-19	5.56238e-18	79.1552	NM_001126044.1;NM_198714.1;NM_198715.2;NM_198716.1;NM_198717.1;NM_198718.1;NM_198719.1;XM_011541809.1;XM_011541810.1;XM_011541811.1
GO:0001777	T cell homeostatic proliferation	biological_process	7	304	11	98659	1.21252e-18	1.08763e-17	206.523	NM_001291428.1;NM_001291431.1;NM_138761.3;NM_138763.3;NM_138764.4;XM_006723314.2;XM_011527191.1
GO:0005757	mitochondrial permeability transition pore complex	cellular_component	7	304	11	98659	1.21252e-18	1.08763e-17	206.523	NM_001291428.1;NM_001291431.1;NM_138761.3;NM_138763.3;NM_138764.4;XM_006723314.2;XM_011527191.1
GO:0007008	outer mitochondrial membrane organization	biological_process	7	304	11	98659	1.21252e-18	1.08763e-17	206.523	NM_001291428.1;NM_001291431.1;NM_138761.3;NM_138763.3;NM_138764.4;XM_006723314.2;XM_011527191.1
GO:0032976	release of matrix enzymes from mitochondria	biological_process	7	304	11	98659	1.21252e-18	1.08763e-17	206.523	NM_001291428.1;NM_001291431.1;NM_138761.3;NM_138763.3;NM_138764.4;XM_006723314.2;XM_011527191.1
GO:0048087	positive regulation of developmental pigmentation	biological_process	7	304	11	98659	1.21252e-18	1.08763e-17	206.523	NM_001291428.1;NM_001291431.1;NM_138761.3;NM_138763.3;NM_138764.4;XM_006723314.2;XM_011527191.1
GO:0097144	BAX complex	cellular_component	7	304	11	98659	1.21252e-18	1.08763e-17	206.523	NM_001291428.1;NM_001291431.1;NM_138761.3;NM_138763.3;NM_138764.4;XM_006723314.2;XM_011527191.1
GO:1990117	B cell receptor apoptotic signaling pathway	biological_process	7	304	11	98659	1.21252e-18	1.08763e-17	206.523	NM_001291428.1;NM_001291431.1;NM_138761.3;NM_138763.3;NM_138764.4;XM_006723314.2;XM_011527191.1
GO:0051015	actin filament binding	molecular_function	25	304	818	98659	1.75932e-18	1.56248e-17	9.91859	NM_015097.2;XM_006713036.1;XM_006713040.1;XM_006713041.1;XM_006713042.1;XM_006713048.1;XM_006713049.1;XM_006713050.1;XM_006713052.1;XM_006713053.1;XM_006713060.1;XM_011511213.1;XM_011533505.1;XM_011533506.1;XM_011533507.1;XM_011533508.1;XM_011533509.1;XM_011533510.1;XM_011533511.1;XM_011533512.1;XM_011533513.1;XM_011533514.1;XM_011533515.1;XM_011533516.1;XM_011533517.1
GO:0045136	development of secondary sexual characteristics	biological_process	7	304	13	98659	9.40728e-18	8.11378e-17	174.75	NM_001291428.1;NM_001291431.1;NM_138761.3;NM_138763.3;NM_138764.4;XM_006723314.2;XM_011527191.1
GO:0046666	retinal cell programmed cell death	biological_process	7	304	13	98659	9.40728e-18	8.11378e-17	174.75	NM_001291428.1;NM_001291431.1;NM_138761.3;NM_138763.3;NM_138764.4;XM_006723314.2;XM_011527191.1
GO:1902512	positive regulation of apoptotic DNA fragmentation	biological_process	7	304	13	98659	9.40728e-18	8.11378e-17	174.75	NM_001291428.1;NM_001291431.1;NM_138761.3;NM_138763.3;NM_138764.4;XM_006723314.2;XM_011527191.1
GO:0043186	P granule	cellular_component	12	304	101	98659	1.11651e-17	9.53822e-17	38.5588	NM_001042476.2;NM_001278260.1;NM_001278261.1;NM_001278262.1;NM_001278263.1;NM_001278264.1;NM_001278265.1;NM_001278266.1;NM_014316.3;XM_005255228.3;XM_005255229.3;XM_011522444.1
GO:0060137	maternal process involved in parturition	biological_process	10	304	53	98659	1.34656e-17	1.13949e-16	61.2332	NM_001126044.1;NM_198714.1;NM_198715.2;NM_198716.1;NM_198717.1;NM_198718.1;NM_198719.1;XM_011541809.1;XM_011541810.1;XM_011541811.1
GO:0002352	B cell negative selection	biological_process	7	304	14	98659	2.18918e-17	1.80155e-16	162.268	NM_001291428.1;NM_001291431.1;NM_138761.3;NM_138763.3;NM_138764.4;XM_006723314.2;XM_011527191.1
GO:0002358	B cell homeostatic proliferation	biological_process	7	304	14	98659	2.18918e-17	1.80155e-16	162.268	NM_001291428.1;NM_001291431.1;NM_138761.3;NM_138763.3;NM_138764.4;XM_006723314.2;XM_011527191.1
GO:0048597	post-embryonic camera-type eye morphogenesis	biological_process	7	304	14	98659	2.18918e-17	1.80155e-16	162.268	NM_001291428.1;NM_001291431.1;NM_138761.3;NM_138763.3;NM_138764.4;XM_006723314.2;XM_011527191.1
GO:0090331	negative regulation of platelet aggregation	biological_process	10	304	56	98659	2.60907e-17	2.12757e-16	57.9529	NM_001126044.1;NM_198714.1;NM_198715.2;NM_198716.1;NM_198717.1;NM_198718.1;NM_198719.1;XM_011541809.1;XM_011541810.1;XM_011541811.1
GO:1901380	negative regulation of potassium ion transmembrane transport	biological_process	10	304	58	98659	3.96794e-17	3.20653e-16	55.9545	NM_001126044.1;NM_198714.1;NM_198715.2;NM_198716.1;NM_198717.1;NM_198718.1;NM_198719.1;XM_011541809.1;XM_011541810.1;XM_011541811.1
GO:0002904	positive regulation of B cell apoptotic process	biological_process	7	304	15	98659	4.67859e-17	3.71389e-16	151.45	NM_001291428.1;NM_001291431.1;NM_138761.3;NM_138763.3;NM_138764.4;XM_006723314.2;XM_011527191.1
GO:1902445	regulation of mitochondrial membrane permeability involved in programmed necrotic cell death	biological_process	7	304	15	98659	4.67859e-17	3.71389e-16	151.45	NM_001291428.1;NM_001291431.1;NM_138761.3;NM_138763.3;NM_138764.4;XM_006723314.2;XM_011527191.1
GO:0014832	urinary bladder smooth muscle contraction	biological_process	10	304	59	98659	4.86399e-17	3.82719e-16	55.0061	NM_001126044.1;NM_198714.1;NM_198715.2;NM_198716.1;NM_198717.1;NM_198718.1;NM_198719.1;XM_011541809.1;XM_011541810.1;XM_011541811.1
GO:0005802	trans-Golgi network	cellular_component	24	304	862	98659	6.78115e-17	5.2893e-16	9.03581	NM_015097.2;XM_006713036.1;XM_006713040.1;XM_006713041.1;XM_006713042.1;XM_006713048.1;XM_006713049.1;XM_006713050.1;XM_006713052.1;XM_006713053.1;XM_006713060.1;XM_011533505.1;XM_011533506.1;XM_011533507.1;XM_011533508.1;XM_011533509.1;XM_011533510.1;XM_011533511.1;XM_011533512.1;XM_011533513.1;XM_011533514.1;XM_011533515.1;XM_011533516.1;XM_011533517.1
GO:0030207	chondroitin sulfate catabolic process	biological_process	10	304	62	98659	8.7615e-17	6.77506e-16	52.3445	NM_000203.4;NM_021948.4;NM_198427.1;XM_006713882.2;XM_011509866.1;XM_011513459.1;XM_011513460.1;XM_011513461.1;XM_011513462.1;XM_011513463.1
GO:1904322	cellular response to forskolin	biological_process	10	304	64	98659	1.27483e-16	9.77371e-16	50.7088	NM_001126044.1;NM_198714.1;NM_198715.2;NM_198716.1;NM_198717.1;NM_198718.1;NM_198719.1;XM_011541809.1;XM_011541810.1;XM_011541811.1
GO:1902074	response to salt	biological_process	10	304	65	98659	1.53034e-16	1.16332e-15	49.9286	NM_001126044.1;NM_198714.1;NM_198715.2;NM_198716.1;NM_198717.1;NM_198718.1;NM_198719.1;XM_011541809.1;XM_011541810.1;XM_011541811.1
GO:0045104	intermediate filament cytoskeleton organization	biological_process	11	304	92	98659	1.71514e-16	1.29284e-15	38.8032	NM_198488.3;XM_005250887.2;XM_005250888.2;XM_005250889.2;XM_006725087.2;XM_006725088.2;XM_006725089.2;XM_011516980.1;XM_011516981.1;XM_011546532.1;XM_011546533.1
GO:0006808	regulation of nitrogen utilization	biological_process	7	304	17	98659	1.75805e-16	1.31414e-15	133.633	NM_001291428.1;NM_001291431.1;NM_138761.3;NM_138763.3;NM_138764.4;XM_006723314.2;XM_011527191.1
GO:0005635	nuclear envelope	cellular_component	24	304	924	98659	3.32719e-16	2.46652e-15	8.42951	NM_001126044.1;NM_001291428.1;NM_001291431.1;NM_138761.3;NM_138763.3;NM_138764.4;NM_198714.1;NM_198715.2;NM_198716.1;NM_198717.1;NM_198718.1;NM_198719.1;XM_006723314.2;XM_011527191.1;XM_011541773.1;XM_011541774.1;XM_011541776.1;XM_011541777.1;XM_011541778.1;XM_011541779.1;XM_011541780.1;XM_011541809.1;XM_011541810.1;XM_011541811.1
GO:0031214	biomineral tissue development	biological_process	11	304	104	98659	7.90755e-16	5.81399e-15	34.3259	NM_198488.3;XM_005250887.2;XM_005250888.2;XM_005250889.2;XM_006725087.2;XM_006725088.2;XM_006725089.2;XM_011516980.1;XM_011516981.1;XM_011546532.1;XM_011546533.1
GO:0051346	negative regulation of hydrolase activity	biological_process	8	304	33	98659	8.0354e-16	5.85997e-15	78.6754	NM_178191.2;XM_011541773.1;XM_011541774.1;XM_011541776.1;XM_011541777.1;XM_011541778.1;XM_011541779.1;XM_011541780.1
GO:0043547	positive regulation of GTPase activity	biological_process	47	304	4010	98659	1.09034e-15	7.88737e-15	3.80379	NM_001098623.2;NM_001271223.2;NM_052843.3;XM_005253166.1;XM_005273287.3;XM_005273288.3;XM_005273289.3;XM_005273290.3;XM_005273291.3;XM_005273292.3;XM_005273293.3;XM_005273294.3;XM_005273295.3;XM_005273296.3;XM_005273297.3;XM_005273298.3;XM_005273299.3;XM_005273300.3;XM_005273301.3;XM_005273302.3;XM_005273304.3;XM_005273305.3;XM_005273307.3;XM_005273309.3;XM_005273310.3;XM_006711819.2;XM_006711820…
GO:0033599	regulation of mammary gland epithelial cell proliferation	biological_process	7	304	21	98659	1.45597e-15	1.0448e-14	108.179	NM_001291428.1;NM_001291431.1;NM_138761.3;NM_138763.3;NM_138764.4;XM_006723314.2;XM_011527191.1
GO:1901030	positive regulation of mitochondrial outer membrane permeabilization involved in apoptotic signaling pathway	biological_process	8	304	36	98659	1.94568e-15	1.38514e-14	72.1192	NM_001291428.1;NM_001291431.1;NM_138761.3;NM_138763.3;NM_138764.4;NM_178191.2;XM_006723314.2;XM_011527191.1
GO:0015379	potassium:chloride symporter activity	molecular_function	7	304	23	98659	3.48951e-15	2.40776e-14	98.7719	NM_001267812.1;NM_001267814.1;NM_020246.3;XM_005250502.2;XM_006716054.2;XM_006716055.2;XM_011516414.1
GO:0022820	potassium ion symporter activity	molecular_function	7	304	23	98659	3.48951e-15	2.40776e-14	98.7719	NM_001267812.1;NM_001267814.1;NM_020246.3;XM_005250502.2;XM_006716054.2;XM_006716055.2;XM_011516414.1
GO:1900103	positive regulation of endoplasmic reticulum unfolded protein response	biological_process	7	304	23	98659	3.48951e-15	2.40776e-14	98.7719	NM_001291428.1;NM_001291431.1;NM_138761.3;NM_138763.3;NM_138764.4;XM_006723314.2;XM_011527191.1
GO:0051549	positive regulation of keratinocyte migration	biological_process	7	304	23	98659	3.48951e-15	2.40776e-14	98.7719	NM_018424.3;NM_019114.4;XM_011518790.1;XM_011518791.1;XM_011518792.1;XM_011518793.1;XM_011518794.1
GO:0005938	cell cortex	cellular_component	24	304	1035	98659	4.3372e-15	2.96982e-14	7.52548	NM_015097.2;XM_006713036.1;XM_006713040.1;XM_006713041.1;XM_006713042.1;XM_006713048.1;XM_006713049.1;XM_006713050.1;XM_006713052.1;XM_006713053.1;XM_006713060.1;XM_011533505.1;XM_011533506.1;XM_011533507.1;XM_011533508.1;XM_011533509.1;XM_011533510.1;XM_011533511.1;XM_011533512.1;XM_011533513.1;XM_011533514.1;XM_011533515.1;XM_011533516.1;XM_011533517.1
GO:0031584	activation of phospholipase D activity	biological_process	7	304	24	98659	5.2203e-15	3.54743e-14	94.6564	XM_011541773.1;XM_011541774.1;XM_011541776.1;XM_011541777.1;XM_011541778.1;XM_011541779.1;XM_011541780.1
GO:0030818	negative regulation of cAMP biosynthetic process	biological_process	10	304	90	98659	6.64498e-15	4.48161e-14	36.0596	NM_001126044.1;NM_198714.1;NM_198715.2;NM_198716.1;NM_198717.1;NM_198718.1;NM_198719.1;XM_011541809.1;XM_011541810.1;XM_011541811.1
GO:0006927	transformed cell apoptotic process	biological_process	8	304	42	98659	9.06759e-15	6.06987e-14	61.8164	NM_001243079.1;NM_001291428.1;NM_001291431.1;NM_138761.3;NM_138763.3;NM_138764.4;XM_006723314.2;XM_011527191.1
GO:0030135	coated vesicle	cellular_component	7	304	26	98659	1.10298e-14	7.22172e-14	87.3751	NM_000203.4;XM_006713882.2;XM_011513459.1;XM_011513460.1;XM_011513461.1;XM_011513462.1;XM_011513463.1
GO:0097136	Bcl-2 family protein complex	cellular_component	7	304	26	98659	1.10298e-14	7.22172e-14	87.3751	NM_001291428.1;NM_001291431.1;NM_138761.3;NM_138763.3;NM_138764.4;XM_006723314.2;XM_011527191.1
GO:0045179	apical cortex	cellular_component	7	304	26	98659	1.10298e-14	7.22172e-14	87.3751	XM_011541773.1;XM_011541774.1;XM_011541776.1;XM_011541777.1;XM_011541778.1;XM_011541779.1;XM_011541780.1
GO:0060058	positive regulation of apoptotic process involved in mammary gland involution	biological_process	7	304	27	98659	1.56322e-14	1.01609e-13	84.139	NM_001291428.1;NM_001291431.1;NM_138761.3;NM_138763.3;NM_138764.4;XM_006723314.2;XM_011527191.1
GO:2000664	positive regulation of interleukin-5 secretion	biological_process	7	304	29	98659	3.00613e-14	1.93993e-13	78.3363	XM_011541773.1;XM_011541774.1;XM_011541776.1;XM_011541777.1;XM_011541778.1;XM_011541779.1;XM_011541780.1
GO:0045765	regulation of angiogenesis	biological_process	11	304	143	98659	3.90566e-14	2.50241e-13	24.9643	NM_004184.3;NM_173701.1;NM_213645.1;NM_213646.1;XM_005268044.2;XM_006720249.2;XM_011537133.1;XM_011537134.1;XM_011537135.1;XM_011537136.1;XM_011537137.1
GO:0007007	inner mitochondrial membrane organization	biological_process	7	304	30	98659	4.08834e-14	2.60088e-13	75.7251	NM_001291428.1;NM_001291431.1;NM_138761.3;NM_138763.3;NM_138764.4;XM_006723314.2;XM_011527191.1
GO:0045095	keratin filament	cellular_component	11	304	150	98659	6.9554e-14	4.39366e-13	23.7993	NM_198488.3;XM_005250887.2;XM_005250888.2;XM_005250889.2;XM_006725087.2;XM_006725088.2;XM_006725089.2;XM_011516980.1;XM_011516981.1;XM_011546532.1;XM_011546533.1
GO:0051434	BH3 domain binding	molecular_function	7	304	32	98659	7.30805e-14	4.5523e-13	70.9923	NM_001291428.1;NM_001291431.1;NM_138761.3;NM_138763.3;NM_138764.4;XM_006723314.2;XM_011527191.1
GO:0044772	mitotic cell cycle phase transition	biological_process	7	304	32	98659	7.30805e-14	4.5523e-13	70.9923	NM_021020.3;XM_005273394.3;XM_011544383.1;XM_011544384.1;XM_011544385.1;XM_011544386.1;XM_011544387.1
GO:2001181	positive regulation of interleukin-10 secretion	biological_process	7	304	34	98659	1.25477e-13	7.76224e-13	66.8163	XM_011541773.1;XM_011541774.1;XM_011541776.1;XM_011541777.1;XM_011541778.1;XM_011541779.1;XM_011541780.1
GO:0031497	chromatin assembly	biological_process	8	304	58	98659	2.07421e-13	1.26074e-12	44.7636	NM_138477.2;XM_005254176.3;XM_011521270.1;XM_011521271.1;XM_011521272.1;XM_011521273.1;XM_011521274.1;XM_011521275.1
GO:0035234	ectopic germ cell programmed cell death	biological_process	7	304	36	98659	2.08014e-13	1.26074e-12	63.1043	NM_001291428.1;NM_001291431.1;NM_138761.3;NM_138763.3;NM_138764.4;XM_006723314.2;XM_011527191.1
GO:1902262	apoptotic process involved in patterning of blood vessels	biological_process	7	304	36	98659	2.08014e-13	1.26074e-12	63.1043	NM_001291428.1;NM_001291431.1;NM_138761.3;NM_138763.3;NM_138764.4;XM_006723314.2;XM_011527191.1
GO:0006418	tRNA aminoacylation for protein translation	biological_process	11	304	167	98659	2.52404e-13	1.51951e-12	21.3766	NM_004184.3;NM_173701.1;NM_213645.1;NM_213646.1;XM_005268044.2;XM_006720249.2;XM_011537133.1;XM_011537134.1;XM_011537135.1;XM_011537136.1;XM_011537137.1
GO:0009651	response to salt stress	biological_process	7	304	37	98659	2.6469e-13	1.57236e-12	61.3987	NM_001291428.1;NM_001291431.1;NM_138761.3;NM_138763.3;NM_138764.4;XM_006723314.2;XM_011527191.1
GO:0010248	establishment or maintenance of transmembrane electrochemical gradient	biological_process	7	304	37	98659	2.6469e-13	1.57236e-12	61.3987	NM_001291428.1;NM_001291431.1;NM_138761.3;NM_138763.3;NM_138764.4;XM_006723314.2;XM_011527191.1
GO:0010837	regulation of keratinocyte proliferation	biological_process	7	304	38	98659	3.34381e-13	1.97329e-12	59.783	NM_018424.3;NM_019114.4;XM_011518790.1;XM_011518791.1;XM_011518792.1;XM_011518793.1;XM_011518794.1
GO:0043203	axon hillock	cellular_component	7	304	39	98659	4.19551e-13	2.44375e-12	58.2501	XM_011541773.1;XM_011541774.1;XM_011541776.1;XM_011541777.1;XM_011541778.1;XM_011541779.1;XM_011541780.1
GO:2000553	positive regulation of T-helper 2 cell cytokine production	biological_process	7	304	39	98659	4.19551e-13	2.44375e-12	58.2501	XM_011541773.1;XM_011541774.1;XM_011541776.1;XM_011541777.1;XM_011541778.1;XM_011541779.1;XM_011541780.1
GO:0006987	activation of signaling protein activity involved in unfolded protein response	biological_process	7	304	42	98659	7.9847e-13	4.5912e-12	54.0894	NM_001291428.1;NM_001291431.1;NM_138761.3;NM_138763.3;NM_138764.4;XM_006723314.2;XM_011527191.1
GO:0032471	negative regulation of endoplasmic reticulum calcium ion concentration	biological_process	7	304	42	98659	7.9847e-13	4.5912e-12	54.0894	NM_001291428.1;NM_001291431.1;NM_138761.3;NM_138763.3;NM_138764.4;XM_006723314.2;XM_011527191.1
GO:0045907	positive regulation of vasoconstriction	biological_process	10	304	141	98659	1.02214e-12	5.83985e-12	23.0168	NM_001126044.1;NM_198714.1;NM_198715.2;NM_198716.1;NM_198717.1;NM_198718.1;NM_198719.1;XM_011541809.1;XM_011541810.1;XM_011541811.1
GO:0034349	glial cell apoptotic process	biological_process	7	304	44	98659	1.19259e-12	6.77059e-12	51.6308	NM_001291428.1;NM_001291431.1;NM_138761.3;NM_138763.3;NM_138764.4;XM_006723314.2;XM_011527191.1
GO:0060011	Sertoli cell proliferation	biological_process	7	304	46	98659	1.74646e-12	9.85267e-12	49.3859	NM_001291428.1;NM_001291431.1;NM_138761.3;NM_138763.3;NM_138764.4;XM_006723314.2;XM_011527191.1
GO:0035308	negative regulation of protein dephosphorylation	biological_process	6	304	27	98659	2.0728e-12	1.16206e-11	72.1192	NM_001242902.1;NM_001242903.1;NM_003488.3;XM_005257707.1;XM_005257709.1;XM_011525318.1
GO:0046930	pore complex	cellular_component	7	304	47	98659	2.0991e-12	1.1695e-11	48.3352	NM_001291428.1;NM_001291431.1;NM_138761.3;NM_138763.3;NM_138764.4;XM_006723314.2;XM_011527191.1
GO:0005524	ATP binding	molecular_function	70	304	9569	98659	2.32905e-12	1.28961e-11	2.37408	NM_001098623.2;NM_001122957.2;NM_001243079.1;NM_001271223.2;NM_001271926.1;NM_004184.3;NM_005881.3;NM_052843.3;NM_173701.1;NM_213645.1;NM_213646.1;XM_005268044.2;XM_005273287.3;XM_005273288.3;XM_005273289.3;XM_005273290.3;XM_005273291.3;XM_005273292.3;XM_005273293.3;XM_005273294.3;XM_005273295.3;XM_005273296.3;XM_005273297.3;XM_005273298.3;XM_005273299.3;XM_005273300.3;XM_005273301.3;XM_005273302…
GO:0005152	interleukin-1 receptor antagonist activity	molecular_function	5	304	14	98659	2.39595e-12	1.31851e-11	115.906	NM_012293.2;XM_005264707.2;XM_011510395.1;XM_011510396.1;XM_011510397.1
GO:2000667	positive regulation of interleukin-13 secretion	biological_process	7	304	48	98659	2.51221e-12	1.37406e-11	47.3282	XM_011541773.1;XM_011541774.1;XM_011541776.1;XM_011541777.1;XM_011541778.1;XM_011541779.1;XM_011541780.1
GO:0043274	phospholipase binding	molecular_function	9	304	112	98659	2.85281e-12	1.55089e-11	26.0788	NM_000377.2;XM_011541773.1;XM_011541774.1;XM_011541776.1;XM_011541777.1;XM_011541778.1;XM_011541779.1;XM_011541780.1;XM_011543977.1
GO:0015267	channel activity	molecular_function	7	304	50	98659	3.55526e-12	1.90962e-11	45.4351	NM_001291428.1;NM_001291431.1;NM_138761.3;NM_138763.3;NM_138764.4;XM_006723314.2;XM_011527191.1
GO:0016242	negative regulation of macroautophagy	biological_process	7	304	50	98659	3.55526e-12	1.90962e-11	45.4351	NM_021020.3;XM_005273394.3;XM_011544383.1;XM_011544384.1;XM_011544385.1;XM_011544386.1;XM_011544387.1
GO:1902263	apoptotic process involved in embryonic digit morphogenesis	biological_process	7	304	51	98659	4.20547e-12	2.24542e-11	44.5442	NM_001291428.1;NM_001291431.1;NM_138761.3;NM_138763.3;NM_138764.4;XM_006723314.2;XM_011527191.1
GO:0048515	spermatid differentiation	biological_process	7	304	52	98659	4.95686e-12	2.63095e-11	43.6876	NM_001291428.1;NM_001291431.1;NM_138761.3;NM_138763.3;NM_138764.4;XM_006723314.2;XM_011527191.1
GO:0019901	protein kinase binding	molecular_function	33	304	2695	98659	5.71661e-12	3.01635e-11	3.97391	NM_000377.2;NM_001164673.1;NM_001242902.1;NM_001242903.1;NM_001256896.1;NM_001301071.1;NM_003488.3;NM_173660.4;NM_198488.3;XM_005250887.2;XM_005250888.2;XM_005250889.2;XM_005257707.1;XM_005257709.1;XM_006725087.2;XM_006725088.2;XM_006725089.2;XM_011513435.1;XM_011513436.1;XM_011513437.1;XM_011516980.1;XM_011516981.1;XM_011525318.1;XM_011541773.1;XM_011541774.1;XM_011541776.1;XM_011541777.1;XM_011…
GO:0030061	mitochondrial crista	cellular_component	6	304	31	98659	6.07347e-12	3.18591e-11	62.8135	NM_001242902.1;NM_001242903.1;NM_003488.3;XM_005257707.1;XM_005257709.1;XM_011525318.1
GO:0060068	vagina development	biological_process	7	304	55	98659	7.956e-12	4.10146e-11	41.3046	NM_001291428.1;NM_001291431.1;NM_138761.3;NM_138763.3;NM_138764.4;XM_006723314.2;XM_011527191.1
GO:0043560	insulin receptor substrate binding	molecular_function	7	304	55	98659	7.956e-12	4.10146e-11	41.3046	XM_011541773.1;XM_011541774.1;XM_011541776.1;XM_011541777.1;XM_011541778.1;XM_011541779.1;XM_011541780.1
GO:0060081	membrane hyperpolarization	biological_process	7	304	55	98659	7.956e-12	4.10146e-11	41.3046	XM_011541773.1;XM_011541774.1;XM_011541776.1;XM_011541777.1;XM_011541778.1;XM_011541779.1;XM_011541780.1
GO:0046676	negative regulation of insulin secretion	biological_process	10	304	172	98659	9.0001e-12	4.61319e-11	18.8684	NM_001126044.1;NM_198714.1;NM_198715.2;NM_198716.1;NM_198717.1;NM_198718.1;NM_198719.1;XM_011541809.1;XM_011541810.1;XM_011541811.1
GO:0008635	activation of cysteine-type endopeptidase activity involved in apoptotic process by cytochrome c	biological_process	7	304	56	98659	9.25728e-12	4.6914e-11	40.567	NM_001291428.1;NM_001291431.1;NM_138761.3;NM_138763.3;NM_138764.4;XM_006723314.2;XM_011527191.1
GO:0046628	positive regulation of insulin receptor signaling pathway	biological_process	7	304	56	98659	9.25728e-12	4.6914e-11	40.567	XM_011541773.1;XM_011541774.1;XM_011541776.1;XM_011541777.1;XM_011541778.1;XM_011541779.1;XM_011541780.1
GO:0030819	positive regulation of cAMP biosynthetic process	biological_process	10	304	174	98659	1.02041e-11	5.14219e-11	18.6515	NM_001126044.1;NM_198714.1;NM_198715.2;NM_198716.1;NM_198717.1;NM_198718.1;NM_198719.1;XM_011541809.1;XM_011541810.1;XM_011541811.1
GO:0060291	long-term synaptic potentiation	biological_process	11	304	230	98659	1.10775e-11	5.55111e-11	15.5213	NM_053052.3;XM_005273041.3;XM_005273044.2;XM_006711734.2;XM_011541773.1;XM_011541774.1;XM_011541776.1;XM_011541777.1;XM_011541778.1;XM_011541779.1;XM_011541780.1
GO:0008156	negative regulation of DNA replication	biological_process	8	304	89	98659	1.13897e-11	5.67587e-11	29.1718	NM_138477.2;XM_005254176.3;XM_011521270.1;XM_011521271.1;XM_011521272.1;XM_011521273.1;XM_011521274.1;XM_011521275.1
GO:0070242	thymocyte apoptotic process	biological_process	7	304	60	98659	1.64974e-11	8.17579e-11	37.8626	NM_001291428.1;NM_001291431.1;NM_138761.3;NM_138763.3;NM_138764.4;XM_006723314.2;XM_011527191.1
GO:0043653	mitochondrial fragmentation involved in apoptotic process	biological_process	7	304	61	98659	1.8937e-11	9.28224e-11	37.2419	NM_001291428.1;NM_001291431.1;NM_138761.3;NM_138763.3;NM_138764.4;XM_006723314.2;XM_011527191.1
GO:0035748	myelin sheath abaxonal region	cellular_component	7	304	61	98659	1.8937e-11	9.28224e-11	37.2419	XM_011541773.1;XM_011541774.1;XM_011541776.1;XM_011541777.1;XM_011541778.1;XM_011541779.1;XM_011541780.1
GO:0010614	negative regulation of cardiac muscle hypertrophy	biological_process	6	304	37	98659	2.34062e-11	1.14105e-10	52.6275	NM_001242902.1;NM_001242903.1;NM_003488.3;XM_005257707.1;XM_005257709.1;XM_011525318.1
GO:0008219	cell death	biological_process	10	304	196	98659	3.69461e-11	1.79139e-10	16.558	NM_001126044.1;NM_198714.1;NM_198715.2;NM_198716.1;NM_198717.1;NM_198718.1;NM_198719.1;XM_011541809.1;XM_011541810.1;XM_011541811.1
GO:0045630	positive regulation of T-helper 2 cell differentiation	biological_process	7	304	67	98659	4.12769e-11	1.99061e-10	33.9068	XM_011541773.1;XM_011541774.1;XM_011541776.1;XM_011541777.1;XM_011541778.1;XM_011541779.1;XM_011541780.1
GO:0051534	negative regulation of NFAT protein import into nucleus	biological_process	6	304	40	98659	4.20513e-11	2.01711e-10	48.6804	NM_001242902.1;NM_001242903.1;NM_003488.3;XM_005257707.1;XM_005257709.1;XM_011525318.1
GO:0032570	response to progesterone	biological_process	10	304	199	98659	4.35007e-11	2.07554e-10	16.3084	NM_001126044.1;NM_198714.1;NM_198715.2;NM_198716.1;NM_198717.1;NM_198718.1;NM_198719.1;XM_011541809.1;XM_011541810.1;XM_011541811.1
GO:0001844	protein insertion into mitochondrial membrane involved in apoptotic signaling pathway	biological_process	7	304	68	98659	4.66559e-11	2.2143e-10	33.4081	NM_001291428.1;NM_001291431.1;NM_138761.3;NM_138763.3;NM_138764.4;XM_006723314.2;XM_011527191.1
GO:0001783	B cell apoptotic process	biological_process	7	304	69	98659	5.26342e-11	2.48489e-10	32.924	NM_001291428.1;NM_001291431.1;NM_138761.3;NM_138763.3;NM_138764.4;XM_006723314.2;XM_011527191.1
GO:0043496	regulation of protein homodimerization activity	biological_process	7	304	70	98659	5.92674e-11	2.7834e-10	32.4536	NM_001291428.1;NM_001291431.1;NM_138761.3;NM_138763.3;NM_138764.4;XM_006723314.2;XM_011527191.1
GO:0002262	myeloid cell homeostasis	biological_process	7	304	71	98659	6.66156e-11	3.1122e-10	31.9965	NM_001291428.1;NM_001291431.1;NM_138761.3;NM_138763.3;NM_138764.4;XM_006723314.2;XM_011527191.1
GO:0015277	kainate selective glutamate receptor activity	molecular_function	6	304	44	98659	8.55275e-11	3.97503e-10	44.2549	NM_000830.3;NM_175611.2;XM_005260942.1;XM_005260943.1;XM_005260944.2;XM_006723991.1
GO:0019902	phosphatase binding	molecular_function	12	304	346	98659	9.10307e-11	4.209e-10	11.2556	NM_001042476.2;NM_001278260.1;NM_001278261.1;NM_001278262.1;NM_001278263.1;NM_001278264.1;NM_001278265.1;NM_001278266.1;NM_014316.3;XM_005255228.3;XM_005255229.3;XM_011522444.1
GO:0021854	hypothalamus development	biological_process	7	304	74	98659	9.36163e-11	4.28438e-10	30.6994	NM_001291428.1;NM_001291431.1;NM_138761.3;NM_138763.3;NM_138764.4;XM_006723314.2;XM_011527191.1
GO:0032461	positive regulation of protein oligomerization	biological_process	7	304	74	98659	9.36163e-11	4.28438e-10	30.6994	NM_001291428.1;NM_001291431.1;NM_138761.3;NM_138763.3;NM_138764.4;XM_006723314.2;XM_011527191.1
GO:0001525	angiogenesis	biological_process	21	304	1262	98659	1.07007e-10	4.87233e-10	5.40036	NM_001161441.1;NM_001161442.1;NM_001161443.1;NM_001161444.1;NM_003975.3;NM_004184.3;NM_173701.1;NM_178191.2;NM_213645.1;NM_213646.1;XM_005268044.2;XM_006711615.1;XM_006720249.2;XM_011510113.1;XM_011510114.1;XM_011510115.1;XM_011537133.1;XM_011537134.1;XM_011537135.1;XM_011537136.1;XM_011537137.1
GO:0043497	regulation of protein heterodimerization activity	biological_process	7	304	76	98659	1.165e-10	5.27781e-10	29.8915	NM_001291428.1;NM_001291431.1;NM_138761.3;NM_138763.3;NM_138764.4;XM_006723314.2;XM_011527191.1
GO:0030346	protein phosphatase 2B binding	molecular_function	6	304	46	98659	1.18834e-10	5.35647e-10	42.3308	NM_001242902.1;NM_001242903.1;NM_003488.3;XM_005257707.1;XM_005257709.1;XM_011525318.1
GO:0010628	positive regulation of gene expression	biological_process	21	304	1285	98659	1.49946e-10	6.72507e-10	5.3037	NM_001126044.1;NM_001145412.2;NM_001145413.2;NM_004472.2;NM_018424.3;NM_019114.4;NM_145260.2;NM_198714.1;NM_198715.2;NM_198716.1;NM_198717.1;NM_198718.1;NM_198719.1;XM_011518790.1;XM_011518791.1;XM_011518792.1;XM_011518793.1;XM_011518794.1;XM_011541809.1;XM_011541810.1;XM_011541811.1
GO:1903896	positive regulation of IRE1-mediated unfolded protein response	biological_process	7	304	79	98659	1.59904e-10	7.1007e-10	28.7564	NM_001291428.1;NM_001291431.1;NM_138761.3;NM_138763.3;NM_138764.4;XM_006723314.2;XM_011527191.1
GO:0050732	negative regulation of peptidyl-tyrosine phosphorylation	biological_process	7	304	79	98659	1.59904e-10	7.1007e-10	28.7564	XM_011541773.1;XM_011541774.1;XM_011541776.1;XM_011541777.1;XM_011541778.1;XM_011541779.1;XM_011541780.1
GO:0051301	cell division	biological_process	26	304	1980	98659	1.83311e-10	8.10001e-10	4.26159	NM_001243079.1;NM_015097.2;XM_006713036.1;XM_006713040.1;XM_006713041.1;XM_006713042.1;XM_006713048.1;XM_006713049.1;XM_006713050.1;XM_006713052.1;XM_006713053.1;XM_006713060.1;XM_011513250.1;XM_011533505.1;XM_011533506.1;XM_011533507.1;XM_011533508.1;XM_011533509.1;XM_011533510.1;XM_011533511.1;XM_011533512.1;XM_011533513.1;XM_011533514.1;XM_011533515.1;XM_011533516.1;XM_011533517.1
GO:0008637	apoptotic mitochondrial changes	biological_process	7	304	81	98659	1.96094e-10	8.62237e-10	28.0463	NM_001291428.1;NM_001291431.1;NM_138761.3;NM_138763.3;NM_138764.4;XM_006723314.2;XM_011527191.1
GO:0031333	negative regulation of protein complex assembly	biological_process	7	304	82	98659	2.16715e-10	9.48259e-10	27.7043	XM_011541773.1;XM_011541774.1;XM_011541776.1;XM_011541777.1;XM_011541778.1;XM_011541779.1;XM_011541780.1
GO:0031526	brush border membrane	cellular_component	10	304	236	98659	2.68461e-10	1.16898e-09	13.7515	NM_001126044.1;NM_198714.1;NM_198715.2;NM_198716.1;NM_198717.1;NM_198718.1;NM_198719.1;XM_011541809.1;XM_011541810.1;XM_011541811.1
GO:0097296	activation of cysteine-type endopeptidase activity involved in apoptotic signaling pathway	biological_process	7	304	86	98659	3.19207e-10	1.37658e-09	26.4157	NM_001291428.1;NM_001291431.1;NM_138761.3;NM_138763.3;NM_138764.4;XM_006723314.2;XM_011527191.1
GO:2001234	negative regulation of apoptotic signaling pathway	biological_process	7	304	86	98659	3.19207e-10	1.37658e-09	26.4157	NM_001291428.1;NM_001291431.1;NM_138761.3;NM_138763.3;NM_138764.4;XM_006723314.2;XM_011527191.1
GO:0000932	cytoplasmic mRNA processing body	cellular_component	12	304	385	98659	3.35714e-10	1.44084e-09	10.1154	NM_001042476.2;NM_001278260.1;NM_001278261.1;NM_001278262.1;NM_001278263.1;NM_001278264.1;NM_001278265.1;NM_001278266.1;NM_014316.3;XM_005255228.3;XM_005255229.3;XM_011522444.1
GO:0005923	bicellular tight junction	cellular_component	16	304	761	98659	3.76944e-10	1.61009e-09	6.82336	NM_001130861.1;NM_003277.3;NM_018424.3;NM_019114.4;XM_011518790.1;XM_011518791.1;XM_011518792.1;XM_011518793.1;XM_011518794.1;XM_011541773.1;XM_011541774.1;XM_011541776.1;XM_011541777.1;XM_011541778.1;XM_011541779.1;XM_011541780.1
GO:1990138	neuron projection extension	biological_process	7	304	88	98659	3.84629e-10	1.63513e-09	25.8154	XM_011541773.1;XM_011541774.1;XM_011541776.1;XM_011541777.1;XM_011541778.1;XM_011541779.1;XM_011541780.1
GO:0003730	mRNA 3'-UTR binding	molecular_function	12	304	390	98659	3.92672e-10	1.66145e-09	9.98573	NM_001042476.2;NM_001278260.1;NM_001278261.1;NM_001278262.1;NM_001278263.1;NM_001278264.1;NM_001278265.1;NM_001278266.1;NM_014316.3;XM_005255228.3;XM_005255229.3;XM_011522444.1
GO:2001241	positive regulation of extrinsic apoptotic signaling pathway in absence of ligand	biological_process	7	304	90	98659	4.61382e-10	1.943e-09	25.2417	NM_001291428.1;NM_001291431.1;NM_138761.3;NM_138763.3;NM_138764.4;XM_006723314.2;XM_011527191.1
GO:0046326	positive regulation of glucose import	biological_process	9	304	187	98659	4.64124e-10	1.94542e-09	15.6194	NM_001145412.2;NM_001145413.2;XM_011541773.1;XM_011541774.1;XM_011541776.1;XM_011541777.1;XM_011541778.1;XM_011541779.1;XM_011541780.1
GO:0045333	cellular respiration	biological_process	7	304	94	98659	6.55536e-10	2.73496e-09	24.1676	NM_001291428.1;NM_001291431.1;NM_138761.3;NM_138763.3;NM_138764.4;XM_006723314.2;XM_011527191.1
GO:0030513	positive regulation of BMP signaling pathway	biological_process	8	304	141	98659	7.28781e-10	3.02646e-09	18.4134	NM_001135914.1;NM_004472.2;XM_011516171.1;XM_011516172.1;XM_011516173.1;XM_011516174.1;XM_011516175.1;XM_011516176.1
GO:0048814	regulation of dendrite morphogenesis	biological_process	7	304	96	98659	7.76738e-10	3.21076e-09	23.6641	NM_021020.3;XM_005273394.3;XM_011544383.1;XM_011544384.1;XM_011544385.1;XM_011544386.1;XM_011544387.1
GO:0004697	protein kinase C activity	molecular_function	7	304	98	98659	9.16907e-10	3.77278e-09	23.1812	XM_011541773.1;XM_011541774.1;XM_011541776.1;XM_011541777.1;XM_011541778.1;XM_011541779.1;XM_011541780.1
GO:0047496	vesicle transport along microtubule	biological_process	7	304	99	98659	9.9486e-10	4.07484e-09	22.947	XM_011541773.1;XM_011541774.1;XM_011541776.1;XM_011541777.1;XM_011541778.1;XM_011541779.1;XM_011541780.1
GO:0043488	regulation of mRNA stability	biological_process	12	304	422	98659	1.01845e-09	4.15251e-09	9.22852	NM_001042476.2;NM_001278260.1;NM_001278261.1;NM_001278262.1;NM_001278263.1;NM_001278264.1;NM_001278265.1;NM_001278266.1;NM_014316.3;XM_005255228.3;XM_005255229.3;XM_011522444.1
GO:0051412	response to corticosterone	biological_process	7	304	102	98659	1.26419e-09	5.13113e-09	22.2721	NM_001291428.1;NM_001291431.1;NM_138761.3;NM_138763.3;NM_138764.4;XM_006723314.2;XM_011527191.1
GO:0004879	RNA polymerase II transcription factor activity, ligand-activated sequence-specific DNA binding	molecular_function	10	304	274	98659	1.2932e-09	5.22523e-09	11.8444	NM_001126044.1;NM_198714.1;NM_198715.2;NM_198716.1;NM_198717.1;NM_198718.1;NM_198719.1;XM_011541809.1;XM_011541810.1;XM_011541811.1
GO:0051281	positive regulation of release of sequestered calcium ion into cytosol	biological_process	7	304	106	98659	1.72012e-09	6.91904e-09	21.4316	NM_001291428.1;NM_001291431.1;NM_138761.3;NM_138763.3;NM_138764.4;XM_006723314.2;XM_011527191.1
GO:0005811	lipid particle	cellular_component	10	304	283	98659	1.8125e-09	7.25811e-09	11.4677	NM_001130848.1;NM_001242902.1;NM_001242903.1;NM_003488.3;NM_004910.2;XM_005257707.1;XM_005257709.1;XM_011525318.1;XM_011545396.1;XM_011545397.1
GO:0032753	positive regulation of interleukin-4 production	biological_process	7	304	107	98659	1.85417e-09	7.39196e-09	21.2313	XM_011541773.1;XM_011541774.1;XM_011541776.1;XM_011541777.1;XM_011541778.1;XM_011541779.1;XM_011541780.1
GO:0071347	cellular response to interleukin-1	biological_process	10	304	285	98659	1.9506e-09	7.74198e-09	11.3872	NM_001126044.1;NM_198714.1;NM_198715.2;NM_198716.1;NM_198717.1;NM_198718.1;NM_198719.1;XM_011541809.1;XM_011541810.1;XM_011541811.1
GO:0006325	chromatin organization	biological_process	8	304	164	98659	2.77032e-09	1.09471e-08	15.831	NM_138477.2;XM_005254176.3;XM_011521270.1;XM_011521271.1;XM_011521272.1;XM_011521273.1;XM_011521274.1;XM_011521275.1
GO:0045211	postsynaptic membrane	cellular_component	21	304	1507	98659	2.7853e-09	1.0958e-08	4.5224	NM_000830.3;NM_001242902.1;NM_001242903.1;NM_003488.3;NM_021020.3;NM_175611.2;XM_005257707.1;XM_005257709.1;XM_005260942.1;XM_005260943.1;XM_005260944.2;XM_005273394.3;XM_006718211.1;XM_006718213.1;XM_006723991.1;XM_011525318.1;XM_011544383.1;XM_011544384.1;XM_011544385.1;XM_011544386.1;XM_011544387.1
GO:0032469	endoplasmic reticulum calcium ion homeostasis	biological_process	7	304	114	98659	3.07278e-09	1.20362e-08	19.9277	NM_001291428.1;NM_001291431.1;NM_138761.3;NM_138763.3;NM_138764.4;XM_006723314.2;XM_011527191.1
GO:0030522	intracellular receptor signaling pathway	biological_process	10	304	299	98659	3.21183e-09	1.25261e-08	10.8541	NM_001126044.1;NM_198714.1;NM_198715.2;NM_198716.1;NM_198717.1;NM_198718.1;NM_198719.1;XM_011541809.1;XM_011541810.1;XM_011541811.1
GO:0008053	mitochondrial fusion	biological_process	7	304	116	98659	3.52831e-09	1.37008e-08	19.5841	NM_001291428.1;NM_001291431.1;NM_138761.3;NM_138763.3;NM_138764.4;XM_006723314.2;XM_011527191.1
GO:0051881	regulation of mitochondrial membrane potential	biological_process	7	304	117	98659	3.77719e-09	1.46041e-08	19.4167	NM_001291428.1;NM_001291431.1;NM_138761.3;NM_138763.3;NM_138764.4;XM_006723314.2;XM_011527191.1
GO:0001960	negative regulation of cytokine-mediated signaling pathway	biological_process	5	304	43	98659	4.51212e-09	1.73707e-08	37.7368	NM_012293.2;XM_005264707.2;XM_011510395.1;XM_011510396.1;XM_011510397.1
GO:0070528	protein kinase C signaling	biological_process	7	304	120	98659	4.61717e-09	1.76991e-08	18.9313	XM_011541773.1;XM_011541774.1;XM_011541776.1;XM_011541777.1;XM_011541778.1;XM_011541779.1;XM_011541780.1
GO:0046872	metal ion binding	molecular_function	71	304	11601	98659	4.69888e-09	1.79357e-08	1.98621	NM_001098623.2;NM_001130848.1;NM_001271223.2;NM_004910.2;NM_012293.2;NM_015898.2;NM_017560.1;NM_052843.3;NM_145260.2;XM_005253166.1;XM_005259570.3;XM_005259571.3;XM_005259572.2;XM_005264707.2;XM_005273287.3;XM_005273288.3;XM_005273289.3;XM_005273290.3;XM_005273291.3;XM_005273292.3;XM_005273293.3;XM_005273294.3;XM_005273295.3;XM_005273296.3;XM_005273297.3;XM_005273298.3;XM_005273299.3;XM_005273300…
GO:0001836	release of cytochrome c from mitochondria	biological_process	7	304	121	98659	4.9309e-09	1.87416e-08	18.7748	NM_001291428.1;NM_001291431.1;NM_138761.3;NM_138763.3;NM_138764.4;XM_006723314.2;XM_011527191.1
GO:0046688	response to copper ion	biological_process	7	304	122	98659	5.26289e-09	1.9919e-08	18.6209	NM_001291428.1;NM_001291431.1;NM_138761.3;NM_138763.3;NM_138764.4;XM_006723314.2;XM_011527191.1
GO:0006027	glycosaminoglycan catabolic process	biological_process	7	304	123	98659	5.61404e-09	2.11588e-08	18.4695	NM_000203.4;XM_006713882.2;XM_011513459.1;XM_011513460.1;XM_011513461.1;XM_011513462.1;XM_011513463.1
GO:0031098	stress-activated protein kinase signaling cascade	biological_process	3	304	8	98659	6.12684e-09	2.29949e-08	121.701	NM_001080414.3;XM_005267691.3;XM_011536796.1
GO:0031032	actomyosin structure organization	biological_process	7	304	126	98659	6.79176e-09	2.53842e-08	18.0298	NM_018424.3;NM_019114.4;XM_011518790.1;XM_011518791.1;XM_011518792.1;XM_011518793.1;XM_011518794.1
GO:0010738	regulation of protein kinase A signaling	biological_process	6	304	81	98659	7.04041e-09	2.6125e-08	24.0397	NM_001242902.1;NM_001242903.1;NM_003488.3;XM_005257707.1;XM_005257709.1;XM_011525318.1
GO:0042493	response to drug	biological_process	20	304	1446	98659	7.04822e-09	2.6125e-08	4.48874	NM_001083607.1;NM_001126044.1;NM_001291428.1;NM_001291431.1;NM_052813.4;NM_052814.3;NM_138761.3;NM_138763.3;NM_138764.4;NM_198714.1;NM_198715.2;NM_198716.1;NM_198717.1;NM_198718.1;NM_198719.1;XM_006723314.2;XM_011527191.1;XM_011541809.1;XM_011541810.1;XM_011541811.1
GO:0070584	mitochondrion morphogenesis	biological_process	7	304	129	98659	8.17717e-09	3.01849e-08	17.6105	NM_001291428.1;NM_001291431.1;NM_138761.3;NM_138763.3;NM_138764.4;XM_006723314.2;XM_011527191.1
GO:0001782	B cell homeostasis	biological_process	7	304	131	98659	9.23081e-09	3.39346e-08	17.3416	NM_001291428.1;NM_001291431.1;NM_138761.3;NM_138763.3;NM_138764.4;XM_006723314.2;XM_011527191.1
GO:0001974	blood vessel remodeling	biological_process	7	304	135	98659	1.16943e-08	4.28154e-08	16.8278	NM_001291428.1;NM_001291431.1;NM_138761.3;NM_138763.3;NM_138764.4;XM_006723314.2;XM_011527191.1
GO:0048147	negative regulation of fibroblast proliferation	biological_process	7	304	138	98659	1.38963e-08	5.04657e-08	16.462	NM_001291428.1;NM_001291431.1;NM_138761.3;NM_138763.3;NM_138764.4;XM_006723314.2;XM_011527191.1
GO:0001954	positive regulation of cell-matrix adhesion	biological_process	7	304	138	98659	1.38963e-08	5.04657e-08	16.462	XM_011541773.1;XM_011541774.1;XM_011541776.1;XM_011541777.1;XM_011541778.1;XM_011541779.1;XM_011541780.1
GO:0043202	lysosomal lumen	cellular_component	10	304	348	98659	1.53257e-08	5.54322e-08	9.32575	NM_000203.4;NM_021948.4;NM_198427.1;XM_006713882.2;XM_011509866.1;XM_011513459.1;XM_011513460.1;XM_011513461.1;XM_011513462.1;XM_011513463.1
GO:0005741	mitochondrial outer membrane	cellular_component	15	304	872	98659	1.95376e-08	7.03824e-08	5.58262	NM_001134484.1;NM_001134485.1;NM_001242902.1;NM_001242903.1;NM_001291428.1;NM_001291431.1;NM_003488.3;NM_138761.3;NM_138763.3;NM_138764.4;XM_005257707.1;XM_005257709.1;XM_006723314.2;XM_011525318.1;XM_011527191.1
GO:0007215	glutamate receptor signaling pathway	biological_process	6	304	94	98659	2.00281e-08	7.18607e-08	20.7151	NM_000830.3;NM_175611.2;XM_005260942.1;XM_005260943.1;XM_005260944.2;XM_006723991.1
GO:0034237	protein kinase A regulatory subunit binding	molecular_function	6	304	95	98659	2.15644e-08	7.70649e-08	20.497	NM_001242902.1;NM_001242903.1;NM_003488.3;XM_005257707.1;XM_005257709.1;XM_011525318.1
GO:0008289	lipid binding	molecular_function	14	304	762	98659	2.18838e-08	7.78958e-08	5.96261	NM_001164673.1;NM_001256896.1;NM_001291428.1;NM_001291431.1;NM_001301071.1;NM_138761.3;NM_138763.3;NM_138764.4;NM_173660.4;XM_006723314.2;XM_011513435.1;XM_011513436.1;XM_011513437.1;XM_011527191.1
GO:0051899	membrane depolarization	biological_process	7	304	147	98659	2.27822e-08	8.07733e-08	15.4541	XM_011541773.1;XM_011541774.1;XM_011541776.1;XM_011541777.1;XM_011541778.1;XM_011541779.1;XM_011541780.1
GO:1903788	positive regulation of glutathione biosynthetic process	biological_process	2	304	3	98659	2.89685e-08	1.01901e-07	216.357	NM_001145412.2;NM_001145413.2
GO:0000117	regulation of transcription involved in G2/M transition of mitotic cell cycle	biological_process	2	304	3	98659	2.89685e-08	1.01901e-07	216.357	NM_001186.3;NM_206866.2
GO:0031941	filamentous actin	cellular_component	7	304	155	98659	3.44256e-08	1.20624e-07	14.6565	XM_011541773.1;XM_011541774.1;XM_011541776.1;XM_011541777.1;XM_011541778.1;XM_011541779.1;XM_011541780.1
GO:0061098	positive regulation of protein tyrosine kinase activity	biological_process	7	304	158	98659	3.99538e-08	1.3945e-07	14.3782	NM_001164673.1;NM_001256896.1;NM_001301071.1;NM_173660.4;XM_011513435.1;XM_011513436.1;XM_011513437.1
GO:0031965	nuclear membrane	cellular_component	19	304	1460	98659	4.18732e-08	1.45317e-07	4.22342	NM_001098537.2;NM_001126044.1;NM_020702.4;NM_152286.4;NM_198714.1;NM_198715.2;NM_198716.1;NM_198717.1;NM_198718.1;NM_198719.1;XM_006717102.1;XM_006717104.2;XM_011517966.1;XM_011518664.1;XM_011531513.1;XM_011531514.1;XM_011541809.1;XM_011541810.1;XM_011541811.1
GO:0048873	homeostasis of number of cells within a tissue	biological_process	7	304	159	98659	4.19588e-08	1.45317e-07	14.2878	NM_001291428.1;NM_001291431.1;NM_138761.3;NM_138763.3;NM_138764.4;XM_006723314.2;XM_011527191.1
GO:0010332	response to gamma radiation	biological_process	7	304	160	98659	4.40498e-08	1.51972e-07	14.1985	NM_001291428.1;NM_001291431.1;NM_138761.3;NM_138763.3;NM_138764.4;XM_006723314.2;XM_011527191.1
GO:0007616	long-term memory	biological_process	7	304	163	98659	5.08701e-08	1.74829e-07	13.9371	XM_011541773.1;XM_011541774.1;XM_011541776.1;XM_011541777.1;XM_011541778.1;XM_011541779.1;XM_011541780.1
GO:0007565	female pregnancy	biological_process	10	304	393	98659	5.26395e-08	1.8022e-07	8.25792	NM_001126044.1;NM_198714.1;NM_198715.2;NM_198716.1;NM_198717.1;NM_198718.1;NM_198719.1;XM_011541809.1;XM_011541810.1;XM_011541811.1
GO:0042744	hydrogen peroxide catabolic process	biological_process	5	304	65	98659	5.77512e-08	1.96969e-07	24.9643	NM_012293.2;XM_005264707.2;XM_011510395.1;XM_011510396.1;XM_011510397.1
GO:0097192	extrinsic apoptotic signaling pathway in absence of ligand	biological_process	7	304	166	98659	5.85802e-08	1.9904e-07	13.6853	NM_001291428.1;NM_001291431.1;NM_138761.3;NM_138763.3;NM_138764.4;XM_006723314.2;XM_011527191.1
GO:0071375	cellular response to peptide hormone stimulus	biological_process	6	304	110	98659	5.96993e-08	2.02076e-07	17.702	NM_001242902.1;NM_001242903.1;NM_003488.3;XM_005257707.1;XM_005257709.1;XM_011525318.1
GO:0033137	negative regulation of peptidyl-serine phosphorylation	biological_process	7	304	169	98659	6.72752e-08	2.26864e-07	13.4423	NM_001291428.1;NM_001291431.1;NM_138761.3;NM_138763.3;NM_138764.4;XM_006723314.2;XM_011527191.1
GO:0008526	phosphatidylinositol transporter activity	molecular_function	4	304	34	98659	6.95016e-08	2.33492e-07	38.1807	NM_001130848.1;NM_004910.2;XM_011545396.1;XM_011545397.1
GO:0070062	extracellular exosome	cellular_component	70	304	12145	98659	6.97613e-08	2.33492e-07	1.87053	NM_000203.4;NM_000377.2;NM_001042476.2;NM_001130861.1;NM_001267812.1;NM_001267814.1;NM_001278260.1;NM_001278261.1;NM_001278262.1;NM_001278263.1;NM_001278264.1;NM_001278265.1;NM_001278266.1;NM_001291428.1;NM_001291431.1;NM_003277.3;NM_003321.4;NM_004184.3;NM_012293.2;NM_014316.3;NM_018842.4;NM_020070.3;NM_020246.3;NM_052966.3;NM_138761.3;NM_138763.3;NM_138764.4;NM_173701.1;NM_213645.1;NM_213646.1;…
GO:0032148	activation of protein kinase B activity	biological_process	7	304	170	98659	7.041e-08	2.34787e-07	13.3633	XM_011541773.1;XM_011541774.1;XM_011541776.1;XM_011541777.1;XM_011541778.1;XM_011541779.1;XM_011541780.1
GO:0097193	intrinsic apoptotic signaling pathway	biological_process	7	304	172	98659	7.70579e-08	2.56004e-07	13.2079	NM_001291428.1;NM_001291431.1;NM_138761.3;NM_138763.3;NM_138764.4;XM_006723314.2;XM_011527191.1
GO:0005874	microtubule	cellular_component	24	304	2315	98659	8.35073e-08	2.76406e-07	3.36452	NM_015097.2;XM_006713036.1;XM_006713040.1;XM_006713041.1;XM_006713042.1;XM_006713048.1;XM_006713049.1;XM_006713050.1;XM_006713052.1;XM_006713053.1;XM_006713060.1;XM_011533505.1;XM_011533506.1;XM_011533507.1;XM_011533508.1;XM_011533509.1;XM_011533510.1;XM_011533511.1;XM_011533512.1;XM_011533513.1;XM_011533514.1;XM_011533515.1;XM_011533516.1;XM_011533517.1
GO:0048678	response to axon injury	biological_process	7	304	174	98659	8.42385e-08	2.77801e-07	13.0561	NM_001291428.1;NM_001291431.1;NM_138761.3;NM_138763.3;NM_138764.4;XM_006723314.2;XM_011527191.1
GO:0032502	developmental process	biological_process	5	304	70	98659	9.04959e-08	2.97344e-07	23.1812	NM_001098537.2;NM_152286.4;XM_006717102.1;XM_006717104.2;XM_011518664.1
GO:0071889	14-3-3 protein binding	molecular_function	7	304	180	98659	1.09337e-07	3.57937e-07	12.6209	XM_011541773.1;XM_011541774.1;XM_011541776.1;XM_011541777.1;XM_011541778.1;XM_011541779.1;XM_011541780.1
GO:0001632	leukotriene B4 receptor activity	molecular_function	2	304	4	98659	1.15609e-07	3.75729e-07	162.268	NM_001164692.2;NM_019839.4
GO:0045076	regulation of interleukin-2 biosynthetic process	biological_process	2	304	4	98659	1.15609e-07	3.75729e-07	162.268	NM_052813.4;NM_052814.3
GO:0012505	endomembrane system	cellular_component	13	304	752	98659	1.27393e-07	4.12531e-07	5.61033	NM_001144772.1;NM_053052.3;NM_138477.2;XM_005254176.3;XM_005273041.3;XM_005273044.2;XM_006711734.2;XM_011521270.1;XM_011521271.1;XM_011521272.1;XM_011521273.1;XM_011521274.1;XM_011521275.1
GO:0005234	extracellular-glutamate-gated ion channel activity	molecular_function	6	304	123	98659	1.28773e-07	4.155e-07	15.831	NM_000830.3;NM_175611.2;XM_005260942.1;XM_005260943.1;XM_005260944.2;XM_006723991.1
GO:0005201	extracellular matrix structural constituent	molecular_function	8	304	261	98659	1.52082e-07	4.88951e-07	9.94747	NM_012293.2;NM_021948.4;NM_198427.1;XM_005264707.2;XM_011509866.1;XM_011510395.1;XM_011510396.1;XM_011510397.1
GO:0090200	positive regulation of release of cytochrome c from mitochondria	biological_process	7	304	191	98659	1.72247e-07	5.51805e-07	11.894	NM_001291428.1;NM_001291431.1;NM_138761.3;NM_138763.3;NM_138764.4;XM_006723314.2;XM_011527191.1
GO:0046627	negative regulation of insulin receptor signaling pathway	biological_process	7	304	194	98659	1.9402e-07	6.19344e-07	11.7101	XM_011541773.1;XM_011541774.1;XM_011541776.1;XM_011541777.1;XM_011541778.1;XM_011541779.1;XM_011541780.1
GO:2000463	positive regulation of excitatory postsynaptic potential	biological_process	7	304	195	98659	2.01783e-07	6.41841e-07	11.65	XM_011541773.1;XM_011541774.1;XM_011541776.1;XM_011541777.1;XM_011541778.1;XM_011541779.1;XM_011541780.1
GO:0030054	cell junction	cellular_component	27	304	2964	98659	2.10181e-07	6.66191e-07	2.9563	NM_000830.3;NM_001164673.1;NM_001256896.1;NM_001301071.1;NM_021020.3;NM_173660.4;NM_175611.2;XM_005260942.1;XM_005260943.1;XM_005260944.2;XM_005273394.3;XM_006723991.1;XM_011513435.1;XM_011513436.1;XM_011513437.1;XM_011541773.1;XM_011541774.1;XM_011541776.1;XM_011541777.1;XM_011541778.1;XM_011541779.1;XM_011541780.1;XM_011544383.1;XM_011544384.1;XM_011544385.1;XM_011544386.1;XM_011544387.1
GO:0004601	peroxidase activity	molecular_function	5	304	81	98659	2.17719e-07	6.87655e-07	20.0331	NM_012293.2;XM_005264707.2;XM_011510395.1;XM_011510396.1;XM_011510397.1
GO:0008625	extrinsic apoptotic signaling pathway via death domain receptors	biological_process	7	304	198	98659	2.26692e-07	7.13483e-07	11.4735	NM_001291428.1;NM_001291431.1;NM_138761.3;NM_138763.3;NM_138764.4;XM_006723314.2;XM_011527191.1
GO:0005947	mitochondrial alpha-ketoglutarate dehydrogenase complex	cellular_component	3	304	18	98659	2.61391e-07	8.19817e-07	54.0894	NM_001122957.2;NM_001271926.1;NM_005881.3
GO:0097191	extrinsic apoptotic signaling pathway	biological_process	7	304	202	98659	2.63971e-07	8.25025e-07	11.2463	NM_001291428.1;NM_001291431.1;NM_138761.3;NM_138763.3;NM_138764.4;XM_006723314.2;XM_011527191.1
GO:0042571	immunoglobulin complex, circulating	cellular_component	2	304	5	98659	2.88361e-07	8.95017e-07	129.814	NM_020070.3;XM_011530169.1
GO:0042534	regulation of tumor necrosis factor biosynthetic process	biological_process	2	304	5	98659	2.88361e-07	8.95017e-07	129.814	NM_052813.4;NM_052814.3
GO:0051402	neuron apoptotic process	biological_process	7	304	206	98659	3.06384e-07	9.47677e-07	11.0279	NM_001291428.1;NM_001291431.1;NM_138761.3;NM_138763.3;NM_138764.4;XM_006723314.2;XM_011527191.1
GO:2001244	positive regulation of intrinsic apoptotic signaling pathway	biological_process	7	304	207	98659	3.17855e-07	9.7978e-07	10.9747	NM_001291428.1;NM_001291431.1;NM_138761.3;NM_138763.3;NM_138764.4;XM_006723314.2;XM_011527191.1
GO:0007281	germ cell development	biological_process	7	304	210	98659	3.54502e-07	1.089e-06	10.8179	NM_001291428.1;NM_001291431.1;NM_138761.3;NM_138763.3;NM_138764.4;XM_006723314.2;XM_011527191.1
GO:0009566	fertilization	biological_process	7	304	211	98659	3.67495e-07	1.12506e-06	10.7666	NM_001291428.1;NM_001291431.1;NM_138761.3;NM_138763.3;NM_138764.4;XM_006723314.2;XM_011527191.1
GO:0048167	regulation of synaptic plasticity	biological_process	7	304	214	98659	4.08949e-07	1.24771e-06	10.6157	NM_021020.3;XM_005273394.3;XM_011544383.1;XM_011544384.1;XM_011544385.1;XM_011544386.1;XM_011544387.1
GO:0072332	intrinsic apoptotic signaling pathway by p53 class mediator	biological_process	7	304	219	98659	4.86936e-07	1.48062e-06	10.3733	NM_001291428.1;NM_001291431.1;NM_138761.3;NM_138763.3;NM_138764.4;XM_006723314.2;XM_011527191.1
GO:0032355	response to estradiol	biological_process	11	304	608	98659	5.52354e-07	1.67386e-06	5.87154	NM_001083607.1;NM_001126044.1;NM_198714.1;NM_198715.2;NM_198716.1;NM_198717.1;NM_198718.1;NM_198719.1;XM_011541809.1;XM_011541810.1;XM_011541811.1
GO:0005070	SH3/SH2 adaptor activity	molecular_function	9	304	399	98659	5.83657e-07	1.76276e-06	7.32037	NM_001161441.1;NM_001161442.1;NM_001161443.1;NM_001161444.1;NM_003975.3;XM_006711615.1;XM_011510113.1;XM_011510114.1;XM_011510115.1
GO:0001541	ovarian follicle development	biological_process	7	304	226	98659	6.17266e-07	1.85801e-06	10.052	NM_001291428.1;NM_001291431.1;NM_138761.3;NM_138763.3;NM_138764.4;XM_006723314.2;XM_011527191.1
GO:0015459	potassium channel regulator activity	molecular_function	7	304	229	98659	6.81631e-07	2.04489e-06	9.92032	XM_011541773.1;XM_011541774.1;XM_011541776.1;XM_011541777.1;XM_011541778.1;XM_011541779.1;XM_011541780.1
GO:0005158	insulin receptor binding	molecular_function	7	304	230	98659	7.04322e-07	2.10592e-06	9.87719	NM_001164673.1;NM_001256896.1;NM_001301071.1;NM_173660.4;XM_011513435.1;XM_011513436.1;XM_011513437.1
GO:0042220	response to cocaine	biological_process	7	304	231	98659	7.27655e-07	2.16846e-06	9.83443	NM_001291428.1;NM_001291431.1;NM_138761.3;NM_138763.3;NM_138764.4;XM_006723314.2;XM_011527191.1
GO:0035235	ionotropic glutamate receptor signaling pathway	biological_process	6	304	159	98659	7.35442e-07	2.18441e-06	12.2466	NM_000830.3;NM_175611.2;XM_005260942.1;XM_005260943.1;XM_005260944.2;XM_006723991.1
GO:0009967	positive regulation of signal transduction	biological_process	9	304	413	98659	7.96564e-07	2.35815e-06	7.07222	NM_001161441.1;NM_001161442.1;NM_001161443.1;NM_001161444.1;NM_003975.3;XM_006711615.1;XM_011510113.1;XM_011510114.1;XM_011510115.1
GO:0051966	regulation of synaptic transmission, glutamatergic	biological_process	6	304	163	98659	8.68902e-07	2.56383e-06	11.9461	NM_000830.3;NM_175611.2;XM_005260942.1;XM_005260943.1;XM_005260944.2;XM_006723991.1
GO:0030010	establishment of cell polarity	biological_process	7	304	238	98659	9.10241e-07	2.677e-06	9.54518	XM_011541773.1;XM_011541774.1;XM_011541776.1;XM_011541777.1;XM_011541778.1;XM_011541779.1;XM_011541780.1
GO:0031629	synaptic vesicle fusion to presynaptic active zone membrane	biological_process	4	304	57	98659	9.86891e-07	2.89295e-06	22.7745	NM_053052.3;XM_005273041.3;XM_005273044.2;XM_006711734.2
GO:0045408	regulation of interleukin-6 biosynthetic process	biological_process	2	304	7	98659	1.00465e-06	2.93542e-06	92.7246	NM_052813.4;NM_052814.3
GO:0048010	vascular endothelial growth factor receptor signaling pathway	biological_process	9	304	427	98659	1.07444e-06	3.12914e-06	6.84034	NM_001161441.1;NM_001161442.1;NM_001161443.1;NM_001161444.1;NM_003975.3;XM_006711615.1;XM_011510113.1;XM_011510114.1;XM_011510115.1
GO:0005925	focal adhesion	cellular_component	24	304	2664	98659	1.0876e-06	3.1572e-06	2.92375	NM_015097.2;XM_006713036.1;XM_006713040.1;XM_006713041.1;XM_006713042.1;XM_006713048.1;XM_006713049.1;XM_006713050.1;XM_006713052.1;XM_006713053.1;XM_006713060.1;XM_011533505.1;XM_011533506.1;XM_011533507.1;XM_011533508.1;XM_011533509.1;XM_011533510.1;XM_011533511.1;XM_011533512.1;XM_011533513.1;XM_011533514.1;XM_011533515.1;XM_011533516.1;XM_011533517.1
GO:0016327	apicolateral plasma membrane	cellular_component	5	304	108	98659	1.19727e-06	3.46437e-06	15.0248	NM_001130861.1;NM_001146336.1;NM_001290095.1;NM_001290097.1;NM_003277.3
GO:0031072	heat shock protein binding	molecular_function	7	304	249	98659	1.27574e-06	3.67953e-06	9.12351	NM_001291428.1;NM_001291431.1;NM_138761.3;NM_138763.3;NM_138764.4;XM_006723314.2;XM_011527191.1
GO:0008630	intrinsic apoptotic signaling pathway in response to DNA damage	biological_process	7	304	256	98659	1.56813e-06	4.50836e-06	8.87404	NM_001291428.1;NM_001291431.1;NM_138761.3;NM_138763.3;NM_138764.4;XM_006723314.2;XM_011527191.1
GO:0008104	protein localization	biological_process	8	304	346	98659	1.58525e-06	4.54305e-06	7.50373	NM_138477.2;XM_005254176.3;XM_011521270.1;XM_011521271.1;XM_011521272.1;XM_011521273.1;XM_011521274.1;XM_011521275.1
GO:0031083	BLOC-1 complex	cellular_component	4	304	64	98659	1.76566e-06	5.04394e-06	20.2835	NM_053052.3;XM_005273041.3;XM_005273044.2;XM_006711734.2
GO:0016020	membrane	cellular_component	58	304	10286	98659	2.17999e-06	6.20777e-06	1.82997	NM_001130848.1;NM_001164692.2;NM_001242902.1;NM_001242903.1;NM_001291428.1;NM_001291431.1;NM_003321.4;NM_003488.3;NM_004910.2;NM_015097.2;NM_019839.4;NM_020070.3;NM_052966.3;NM_138761.3;NM_138763.3;NM_138764.4;XM_005257707.1;XM_005257709.1;XM_006713036.1;XM_006713040.1;XM_006713041.1;XM_006713042.1;XM_006713048.1;XM_006713049.1;XM_006713050.1;XM_006713052.1;XM_006713053.1;XM_006713060.1;XM_006723…
GO:0045670	regulation of osteoclast differentiation	biological_process	4	304	67	98659	2.21965e-06	6.30071e-06	19.3753	NM_015898.2;XM_005259570.3;XM_005259571.3;XM_005259572.2
GO:0071222	cellular response to lipopolysaccharide	biological_process	10	304	576	98659	2.24785e-06	6.36062e-06	5.63431	NM_001126044.1;NM_198714.1;NM_198715.2;NM_198716.1;NM_198717.1;NM_198718.1;NM_198719.1;XM_011541809.1;XM_011541810.1;XM_011541811.1
GO:0004974	leukotriene receptor activity	molecular_function	2	304	9	98659	2.40015e-06	6.77023e-06	72.1192	NM_001164692.2;NM_019839.4
GO:0006687	glycosphingolipid metabolic process	biological_process	7	304	274	98659	2.59365e-06	7.29311e-06	8.29107	NM_001291428.1;NM_001291431.1;NM_138761.3;NM_138763.3;NM_138764.4;XM_006723314.2;XM_011527191.1
GO:0034644	cellular response to UV	biological_process	7	304	276	98659	2.73655e-06	7.67089e-06	8.23099	NM_001291428.1;NM_001291431.1;NM_138761.3;NM_138763.3;NM_138764.4;XM_006723314.2;XM_011527191.1
GO:0032091	negative regulation of protein binding	biological_process	7	304	280	98659	3.04249e-06	8.50192e-06	8.1134	NM_001291428.1;NM_001291431.1;NM_138761.3;NM_138763.3;NM_138764.4;XM_006723314.2;XM_011527191.1
GO:0051260	protein homooligomerization	biological_process	12	304	856	98659	3.36841e-06	9.38342e-06	4.54957	NM_001080414.3;NM_001291428.1;NM_001291431.1;NM_138761.3;NM_138763.3;NM_138764.4;NM_153033.4;NM_178191.2;XM_005267691.3;XM_006723314.2;XM_011527191.1;XM_011536796.1
GO:1903142	positive regulation of establishment of endothelial barrier	biological_process	2	304	10	98659	3.42095e-06	9.50027e-06	64.9072	NM_001130861.1;NM_003277.3
GO:0019904	protein domain specific binding	molecular_function	15	304	1293	98659	3.51339e-06	9.72688e-06	3.76492	NM_001145412.2;NM_001145413.2;NM_001242902.1;NM_001242903.1;NM_003488.3;XM_005257707.1;XM_005257709.1;XM_011525318.1;XM_011541773.1;XM_011541774.1;XM_011541776.1;XM_011541777.1;XM_011541778.1;XM_011541779.1;XM_011541780.1
GO:0043198	dendritic shaft	cellular_component	7	304	286	98659	3.5556e-06	9.81346e-06	7.94319	NM_021020.3;XM_005273394.3;XM_011544383.1;XM_011544384.1;XM_011544385.1;XM_011544386.1;XM_011544387.1
GO:0007204	positive regulation of cytosolic calcium ion concentration	biological_process	10	304	611	98659	3.93395e-06	1.08244e-05	5.31156	NM_001126044.1;NM_198714.1;NM_198715.2;NM_198716.1;NM_198717.1;NM_198718.1;NM_198719.1;XM_011541809.1;XM_011541810.1;XM_011541811.1
GO:0015276	ligand-gated ion channel activity	molecular_function	6	304	206	98659	4.10902e-06	1.12715e-05	9.45251	NM_000830.3;NM_175611.2;XM_005260942.1;XM_005260943.1;XM_005260944.2;XM_006723991.1
GO:0009063	cellular amino acid catabolic process	biological_process	3	304	35	98659	4.29164e-06	1.17366e-05	27.8174	NM_001122957.2;NM_001271926.1;NM_005881.3
GO:0042475	odontogenesis of dentin-containing tooth	biological_process	7	304	299	98659	4.92347e-06	1.34236e-05	7.59784	NM_001291428.1;NM_001291431.1;NM_138761.3;NM_138763.3;NM_138764.4;XM_006723314.2;XM_011527191.1
GO:0007602	phototransduction	biological_process	4	304	79	98659	5.02571e-06	1.36608e-05	16.4322	NM_001130848.1;NM_004910.2;XM_011545396.1;XM_011545397.1
GO:0045785	positive regulation of cell adhesion	biological_process	7	304	300	98659	5.04497e-06	1.36717e-05	7.57251	NM_018424.3;NM_019114.4;XM_011518790.1;XM_011518791.1;XM_011518792.1;XM_011518793.1;XM_011518794.1
GO:0060041	retina development in camera-type eye	biological_process	7	304	305	98659	5.69127e-06	1.53767e-05	7.44837	NM_001291428.1;NM_001291431.1;NM_138761.3;NM_138763.3;NM_138764.4;XM_006723314.2;XM_011527191.1
GO:0016082	synaptic vesicle priming	biological_process	4	304	82	98659	6.03868e-06	1.62664e-05	15.831	NM_053052.3;XM_005273041.3;XM_005273044.2;XM_006711734.2
GO:0061737	leukotriene signaling pathway	biological_process	2	304	12	98659	6.24309e-06	1.67666e-05	54.0894	NM_001164692.2;NM_019839.4
GO:0007179	transforming growth factor beta receptor signaling pathway	biological_process	9	304	525	98659	6.64565e-06	1.77945e-05	5.56348	NM_001130861.1;NM_003277.3;XM_011541773.1;XM_011541774.1;XM_011541776.1;XM_011541777.1;XM_011541778.1;XM_011541779.1;XM_011541780.1
GO:0016324	apical plasma membrane	cellular_component	17	304	1699	98659	7.3104e-06	1.95162e-05	3.24727	NM_001146336.1;NM_001290095.1;NM_001290097.1;NM_021020.3;XM_005273394.3;XM_011541773.1;XM_011541774.1;XM_011541776.1;XM_011541777.1;XM_011541778.1;XM_011541779.1;XM_011541780.1;XM_011544383.1;XM_011544384.1;XM_011544385.1;XM_011544386.1;XM_011544387.1
GO:0030208	dermatan sulfate biosynthetic process	biological_process	3	304	40	98659	7.4003e-06	1.96975e-05	24.3402	NM_021948.4;NM_198427.1;XM_011509866.1
GO:0004622	lysophospholipase activity	molecular_function	5	304	150	98659	8.02752e-06	2.13038e-05	10.8179	NM_001098537.2;NM_152286.4;XM_006717102.1;XM_006717104.2;XM_011518664.1
GO:1902037	negative regulation of hematopoietic stem cell differentiation	biological_process	2	304	13	98659	8.09748e-06	2.14261e-05	49.9286	NM_001145412.2;NM_001145413.2
GO:0043525	positive regulation of neuron apoptotic process	biological_process	7	304	321	98659	8.25021e-06	2.1766e-05	7.07711	NM_001291428.1;NM_001291431.1;NM_138761.3;NM_138763.3;NM_138764.4;XM_006723314.2;XM_011527191.1
GO:0048487	beta-tubulin binding	molecular_function	6	304	234	98659	9.43514e-06	2.40472e-05	8.32144	NM_001242902.1;NM_001242903.1;NM_003488.3;XM_005257707.1;XM_005257709.1;XM_011525318.1
GO:0048389	intermediate mesoderm development	biological_process	1	304	2	98659	9.4634e-06	2.40472e-05	162.268	NM_145260.2
GO:0072111	cell proliferation involved in kidney development	biological_process	1	304	2	98659	9.4634e-06	2.40472e-05	162.268	NM_145260.2
GO:0072143	mesangial cell development	biological_process	1	304	2	98659	9.4634e-06	2.40472e-05	162.268	NM_145260.2
GO:0072168	specification of anterior mesonephric tubule identity	biological_process	1	304	2	98659	9.4634e-06	2.40472e-05	162.268	NM_145260.2
GO:0072169	specification of posterior mesonephric tubule identity	biological_process	1	304	2	98659	9.4634e-06	2.40472e-05	162.268	NM_145260.2
GO:0072183	negative regulation of nephron tubule epithelial cell differentiation	biological_process	1	304	2	98659	9.4634e-06	2.40472e-05	162.268	NM_145260.2
GO:0072184	renal vesicle progenitor cell differentiation	biological_process	1	304	2	98659	9.4634e-06	2.40472e-05	162.268	NM_145260.2
GO:0072234	metanephric nephron tubule development	biological_process	1	304	2	98659	9.4634e-06	2.40472e-05	162.268	NM_145260.2
GO:0072239	metanephric glomerulus vasculature development	biological_process	1	304	2	98659	9.4634e-06	2.40472e-05	162.268	NM_145260.2
GO:0072259	metanephric interstitial fibroblast development	biological_process	1	304	2	98659	9.4634e-06	2.40472e-05	162.268	NM_145260.2
GO:0072268	pattern specification involved in metanephros development	biological_process	1	304	2	98659	9.4634e-06	2.40472e-05	162.268	NM_145260.2
GO:0090094	metanephric cap mesenchymal cell proliferation involved in metanephros development	biological_process	1	304	2	98659	9.4634e-06	2.40472e-05	162.268	NM_145260.2
GO:0006412	translation	biological_process	11	304	805	98659	9.63861e-06	2.44233e-05	4.43466	NM_004184.3;NM_173701.1;NM_213645.1;NM_213646.1;XM_005268044.2;XM_006720249.2;XM_011537133.1;XM_011537134.1;XM_011537135.1;XM_011537136.1;XM_011537137.1
GO:0008286	insulin receptor signaling pathway	biological_process	8	304	439	98659	1.07726e-05	2.72197e-05	5.9141	NM_018842.4;XM_011541773.1;XM_011541774.1;XM_011541776.1;XM_011541777.1;XM_011541778.1;XM_011541779.1;XM_011541780.1
GO:0005886	plasma membrane	cellular_component	94	304	20535	98659	1.25417e-05	3.16008e-05	1.48558	NM_000830.3;NM_001083607.1;NM_001126044.1;NM_001145412.2;NM_001145413.2;NM_001164673.1;NM_001164692.2;NM_001164760.1;NM_001256896.1;NM_001267812.1;NM_001267814.1;NM_001301071.1;NM_015097.2;NM_018842.4;NM_019839.4;NM_020246.3;NM_020533.2;NM_052813.4;NM_052814.3;NM_052966.3;NM_053052.3;NM_138477.2;NM_153033.4;NM_173660.4;NM_175611.2;NM_198565.2;NM_198714.1;NM_198715.2;NM_198716.1;NM_198717.1;NM_198…
GO:0036091	positive regulation of transcription from RNA polymerase II promoter in response to oxidative stress	biological_process	2	304	15	98659	1.28235e-05	3.22205e-05	43.2715	NM_001145412.2;NM_001145413.2
GO:0070059	intrinsic apoptotic signaling pathway in response to endoplasmic reticulum stress	biological_process	7	304	345	98659	1.38695e-05	3.47512e-05	6.58479	NM_001291428.1;NM_001291431.1;NM_138761.3;NM_138763.3;NM_138764.4;XM_006723314.2;XM_011527191.1
GO:0051087	chaperone binding	molecular_function	7	304	359	98659	1.8432e-05	4.60543e-05	6.328	NM_001291428.1;NM_001291431.1;NM_138761.3;NM_138763.3;NM_138764.4;XM_006723314.2;XM_011527191.1
GO:0048644	muscle organ morphogenesis	biological_process	2	304	17	98659	1.90774e-05	4.75346e-05	38.1807	NM_032199.2;XM_011540262.1
GO:0015914	phospholipid transport	biological_process	4	304	104	98659	1.92575e-05	4.78504e-05	12.4822	NM_001130848.1;NM_004910.2;XM_011545396.1;XM_011545397.1
GO:0051259	protein oligomerization	biological_process	7	304	366	98659	2.11486e-05	5.24041e-05	6.20698	NM_001291428.1;NM_001291431.1;NM_138761.3;NM_138763.3;NM_138764.4;XM_006723314.2;XM_011527191.1
GO:0006629	lipid metabolic process	biological_process	9	304	606	98659	2.27053e-05	5.61064e-05	4.81984	NM_001098537.2;NM_001130848.1;NM_004910.2;NM_152286.4;XM_006717102.1;XM_006717104.2;XM_011518664.1;XM_011545396.1;XM_011545397.1
GO:0031532	actin cytoskeleton reorganization	biological_process	7	304	372	98659	2.37372e-05	5.84952e-05	6.10686	XM_011541773.1;XM_011541774.1;XM_011541776.1;XM_011541777.1;XM_011541778.1;XM_011541779.1;XM_011541780.1
GO:0051291	protein heterooligomerization	biological_process	7	304	375	98659	2.51279e-05	6.17526e-05	6.05801	XM_011541773.1;XM_011541774.1;XM_011541776.1;XM_011541777.1;XM_011541778.1;XM_011541779.1;XM_011541780.1
GO:0097190	apoptotic signaling pathway	biological_process	7	304	377	98659	2.60924e-05	6.39478e-05	6.02587	NM_001291428.1;NM_001291431.1;NM_138761.3;NM_138763.3;NM_138764.4;XM_006723314.2;XM_011527191.1
GO:0030335	positive regulation of cell migration	biological_process	11	304	896	98659	2.74517e-05	6.70959e-05	3.98426	NM_198488.3;XM_005250887.2;XM_005250888.2;XM_005250889.2;XM_006725087.2;XM_006725088.2;XM_006725089.2;XM_011516980.1;XM_011516981.1;XM_011546532.1;XM_011546533.1
GO:0004857	enzyme inhibitor activity	molecular_function	4	304	112	98659	2.75337e-05	6.71135e-05	11.5906	NM_004886.3;NM_178191.2;XM_006722950.2;XM_006722951.2
GO:0002357	defense response to tumor cell	biological_process	1	304	3	98659	2.83323e-05	6.86866e-05	108.179	NM_001243079.1
GO:0072190	ureter urothelium development	biological_process	1	304	3	98659	2.83323e-05	6.86866e-05	108.179	NM_145260.2
GO:0017124	SH3 domain binding	molecular_function	11	304	901	98659	2.89642e-05	7.00294e-05	3.96215	NM_000377.2;NM_001161441.1;NM_001161442.1;NM_001161443.1;NM_001161444.1;NM_003975.3;XM_006711615.1;XM_011510113.1;XM_011510114.1;XM_011510115.1;XM_011543977.1
GO:0021987	cerebral cortex development	biological_process	7	304	391	98659	3.37519e-05	8.13855e-05	5.81011	NM_001291428.1;NM_001291431.1;NM_138761.3;NM_138763.3;NM_138764.4;XM_006723314.2;XM_011527191.1
GO:0005742	mitochondrial outer membrane translocase complex	cellular_component	2	304	21	98659	3.69736e-05	8.84408e-05	30.9082	NM_001134484.1;NM_001134485.1
GO:0051546	keratinocyte migration	biological_process	2	304	21	98659	3.69736e-05	8.84408e-05	30.9082	NM_001164692.2;NM_019839.4
GO:0004553	hydrolase activity, hydrolyzing O-glycosyl compounds	molecular_function	2	304	21	98659	3.69736e-05	8.84408e-05	30.9082	NM_020702.4;XM_011517966.1
GO:0050760	negative regulation of thymidylate synthase biosynthetic process	biological_process	2	304	22	98659	4.27138e-05	0.0001019	29.5033	XM_006718211.1;XM_006718213.1
GO:0001657	ureteric bud development	biological_process	5	304	203	98659	4.41984e-05	0.000105162	7.9935	NM_005068.2;NM_145260.2;XM_005267100.2;XM_011536072.1;XM_011536073.1
GO:0001205	transcriptional activator activity, RNA polymerase II distal enhancer sequence-specific binding	molecular_function	4	304	124	98659	4.48387e-05	0.000106403	10.4689	NM_001145412.2;NM_001145413.2;NM_001186.3;NM_206866.2
GO:0032947	protein complex scaffold	molecular_function	6	304	299	98659	4.51627e-05	0.000106889	6.51243	NM_001242902.1;NM_001242903.1;NM_003488.3;XM_005257707.1;XM_005257709.1;XM_011525318.1
GO:0008092	cytoskeletal protein binding	molecular_function	7	304	410	98659	4.70777e-05	0.000111128	5.54086	NM_018424.3;NM_019114.4;XM_011518790.1;XM_011518791.1;XM_011518792.1;XM_011518793.1;XM_011518794.1
GO:0044297	cell body	cellular_component	7	304	411	98659	4.78856e-05	0.000112739	5.52738	NM_021020.3;XM_005273394.3;XM_011544383.1;XM_011544384.1;XM_011544385.1;XM_011544386.1;XM_011544387.1
GO:0010499	proteasomal ubiquitin-independent protein catabolic process	biological_process	2	304	23	98659	4.90088e-05	0.00011478	28.2205	NM_001145412.2;NM_001145413.2
GO:1903071	positive regulation of ER-associated ubiquitin-dependent protein catabolic process	biological_process	2	304	23	98659	4.90088e-05	0.00011478	28.2205	NM_001145412.2;NM_001145413.2
GO:0048168	regulation of neuronal synaptic plasticity	biological_process	3	304	66	98659	5.4795e-05	0.000127998	14.7516	NM_021948.4;NM_198427.1;XM_011509866.1
GO:0072133	metanephric mesenchyme morphogenesis	biological_process	1	304	4	98659	5.65489e-05	0.000130733	81.134	NM_145260.2
GO:0042030	ATPase inhibitor activity	molecular_function	1	304	4	98659	5.65489e-05	0.000130733	81.134	NM_178191.2
GO:0001785	prostaglandin J receptor activity	molecular_function	1	304	4	98659	5.65489e-05	0.000130733	81.134	XM_005267891.2
GO:0004956	prostaglandin D receptor activity	molecular_function	1	304	4	98659	5.65489e-05	0.000130733	81.134	XM_005267891.2
GO:0007417	central nervous system development	biological_process	9	304	677	98659	5.72704e-05	0.00013206	4.31437	NM_000830.3;NM_021948.4;NM_175611.2;NM_198427.1;XM_005260942.1;XM_005260943.1;XM_005260944.2;XM_006723991.1;XM_011509866.1
GO:0016577	histone demethylation	biological_process	2	304	25	98659	6.33577e-05	0.000144979	25.9629	NM_032199.2;XM_011540262.1
GO:0032494	response to peptidoglycan	biological_process	2	304	25	98659	6.33577e-05	0.000144979	25.9629	NM_052813.4;NM_052814.3
GO:0070317	negative regulation of G0 to G1 transition	biological_process	2	304	25	98659	6.33577e-05	0.000144979	25.9629	XM_011531513.1;XM_011531514.1
GO:2000146	negative regulation of cell motility	biological_process	2	304	26	98659	7.14584e-05	0.0001631	24.9643	NM_000377.2;XM_011543977.1
GO:0071320	cellular response to cAMP	biological_process	6	304	322	98659	7.18166e-05	0.000163501	6.04726	NM_001242902.1;NM_001242903.1;NM_003488.3;XM_005257707.1;XM_005257709.1;XM_011525318.1
GO:0001822	kidney development	biological_process	9	304	697	98659	7.27634e-05	0.000165237	4.19057	NM_001291428.1;NM_001291431.1;NM_032199.2;NM_138761.3;NM_138763.3;NM_138764.4;XM_006723314.2;XM_011527191.1;XM_011540262.1
GO:0007596	blood coagulation	biological_process	10	304	843	98659	7.43311e-05	0.000168371	3.84978	NM_000377.2;NM_001164760.1;NM_001242902.1;NM_001242903.1;NM_003488.3;NM_006339.2;XM_005257707.1;XM_005257709.1;XM_011525318.1;XM_011543977.1
GO:0001221	transcription cofactor binding	molecular_function	2	304	27	98659	8.02073e-05	0.000181224	24.0397	NM_001145412.2;NM_001145413.2
GO:0009636	response to toxic substance	biological_process	7	304	443	98659	8.05714e-05	0.000181589	5.12811	NM_001291428.1;NM_001291431.1;NM_138761.3;NM_138763.3;NM_138764.4;XM_006723314.2;XM_011527191.1
GO:0045202	synapse	cellular_component	12	304	1167	98659	8.32054e-05	0.000187056	3.33713	NM_001164673.1;NM_001256896.1;NM_001301071.1;NM_021948.4;NM_173660.4;NM_198427.1;XM_006718211.1;XM_006718213.1;XM_011509866.1;XM_011513435.1;XM_011513436.1;XM_011513437.1
GO:0048471	perinuclear region of cytoplasm	cellular_component	25	304	3670	98659	8.48962e-05	0.00019038	2.21074	NM_001083607.1;NM_001291428.1;NM_001291431.1;NM_004886.3;NM_053052.3;NM_138761.3;NM_138763.3;NM_138764.4;XM_005273041.3;XM_005273044.2;XM_006711734.2;XM_006718211.1;XM_006718213.1;XM_006722950.2;XM_006722951.2;XM_006723314.2;XM_011511213.1;XM_011527191.1;XM_011541773.1;XM_011541774.1;XM_011541776.1;XM_011541777.1;XM_011541778.1;XM_011541779.1;XM_011541780.1
GO:0045177	apical part of cell	cellular_component	7	304	448	98659	8.70476e-05	0.000194717	5.07088	NM_018424.3;NM_019114.4;XM_011518790.1;XM_011518791.1;XM_011518792.1;XM_011518793.1;XM_011518794.1
GO:0050871	positive regulation of B cell activation	biological_process	2	304	28	98659	8.96274e-05	0.000199493	23.1812	NM_020070.3;XM_011530169.1
GO:0060613	fat pad development	biological_process	2	304	28	98659	8.96274e-05	0.000199493	23.1812	NM_032199.2;XM_011540262.1
GO:0032275	luteinizing hormone secretion	biological_process	1	304	5	98659	9.4056e-05	0.000208832	64.9072	NM_004472.2
GO:1902476	chloride transmembrane transport	biological_process	7	304	457	98659	9.97917e-05	0.00022102	4.97101	NM_001267812.1;NM_001267814.1;NM_020246.3;XM_005250502.2;XM_006716054.2;XM_006716055.2;XM_011516414.1
GO:0020037	heme binding	molecular_function	7	304	465	98659	0.00011238	0.000248289	4.88549	NM_001186.3;NM_012293.2;NM_206866.2;XM_005264707.2;XM_011510395.1;XM_011510396.1;XM_011510397.1
GO:0072659	protein localization to plasma membrane	biological_process	7	304	466	98659	0.000114042	0.000251342	4.87501	XM_011541773.1;XM_011541774.1;XM_011541776.1;XM_011541777.1;XM_011541778.1;XM_011541779.1;XM_011541780.1
GO:0001540	beta-amyloid binding	molecular_function	5	304	244	98659	0.0001215	0.000266468	6.65033	NM_004886.3;XM_006718211.1;XM_006718213.1;XM_006722950.2;XM_006722951.2
GO:0098869	cellular oxidant detoxification	biological_process	5	304	244	98659	0.0001215	0.000266468	6.65033	NM_012293.2;XM_005264707.2;XM_011510395.1;XM_011510396.1;XM_011510397.1
GO:0042060	wound healing	biological_process	7	304	472	98659	0.000124446	0.000272264	4.81304	NM_018424.3;NM_019114.4;XM_011518790.1;XM_011518791.1;XM_011518792.1;XM_011518793.1;XM_011518794.1
GO:0030154	cell differentiation	biological_process	19	304	2511	98659	0.000125623	0.000274169	2.45567	NM_001161441.1;NM_001161442.1;NM_001161443.1;NM_001161444.1;NM_001197297.1;NM_003975.3;NM_005068.2;NM_015898.2;NM_145260.2;XM_005259570.3;XM_005259571.3;XM_005259572.2;XM_005267100.2;XM_006711615.1;XM_011510113.1;XM_011510114.1;XM_011510115.1;XM_011536072.1;XM_011536073.1
GO:2000121	regulation of removal of superoxide radicals	biological_process	2	304	32	98659	0.000134467	0.000292758	20.2835	NM_001145412.2;NM_001145413.2
GO:0072180	mesonephric duct morphogenesis	biological_process	1	304	6	98659	0.000140796	0.000305058	54.0894	NM_145260.2
GO:0030272	5-formyltetrahydrofolate cyclo-ligase activity	molecular_function	1	304	6	98659	0.000140796	0.000305058	54.0894	NM_178191.2
GO:0071499	cellular response to laminar fluid shear stress	biological_process	2	304	33	98659	0.000147576	0.000317448	19.6689	NM_001145412.2;NM_001145413.2
GO:1903206	negative regulation of hydrogen peroxide-induced cell death	biological_process	2	304	33	98659	0.000147576	0.000317448	19.6689	NM_001145412.2;NM_001145413.2
GO:0009620	response to fungus	biological_process	2	304	33	98659	0.000147576	0.000317448	19.6689	NM_052813.4;NM_052814.3
GO:0019898	extrinsic component of membrane	cellular_component	8	304	622	98659	0.00015598	0.000334722	4.1741	NM_001144772.1;NM_018424.3;NM_019114.4;XM_011518790.1;XM_011518791.1;XM_011518792.1;XM_011518793.1;XM_011518794.1
GO:0005911	cell-cell junction	cellular_component	11	304	1084	98659	0.000164324	0.000351788	3.29326	NM_000377.2;NM_001130861.1;NM_003277.3;XM_011541773.1;XM_011541774.1;XM_011541776.1;XM_011541777.1;XM_011541778.1;XM_011541779.1;XM_011541780.1;XM_011543977.1
GO:0036003	positive regulation of transcription from RNA polymerase II promoter in response to stress	biological_process	2	304	35	98659	0.000176226	0.000375475	18.5449	NM_001145412.2;NM_001145413.2
GO:0034987	immunoglobulin receptor binding	molecular_function	2	304	35	98659	0.000176226	0.000375475	18.5449	NM_020070.3;XM_011530169.1
GO:0006977	DNA damage response, signal transduction by p53 class mediator resulting in cell cycle arrest	biological_process	7	304	498	98659	0.000179016	0.000380515	4.56175	NM_001291428.1;NM_001291431.1;NM_138761.3;NM_138763.3;NM_138764.4;XM_006723314.2;XM_011527191.1
GO:0043197	dendritic spine	cellular_component	9	304	780	98659	0.000180708	0.000383203	3.74465	NM_021020.3;XM_005273394.3;XM_006718211.1;XM_006718213.1;XM_011544383.1;XM_011544384.1;XM_011544385.1;XM_011544386.1;XM_011544387.1
GO:0060325	face morphogenesis	biological_process	4	304	168	98659	0.000187322	0.000396293	7.72705	NM_001130861.1;NM_003277.3;NM_032199.2;XM_011540262.1
GO:0043025	neuronal cell body	cellular_component	16	304	1999	98659	0.000189707	0.000400393	2.59759	NM_001126044.1;NM_053052.3;NM_198714.1;NM_198715.2;NM_198716.1;NM_198717.1;NM_198718.1;NM_198719.1;XM_005273041.3;XM_005273044.2;XM_006711734.2;XM_006718211.1;XM_006718213.1;XM_011541809.1;XM_011541810.1;XM_011541811.1
GO:0016230	sphingomyelin phosphodiesterase activator activity	molecular_function	1	304	7	98659	0.000196713	0.00041227	46.3623	NM_001144772.1
GO:0072166	posterior mesonephric tubule development	biological_process	1	304	7	98659	0.000196713	0.00041227	46.3623	NM_145260.2
GO:0072208	metanephric smooth muscle tissue development	biological_process	1	304	7	98659	0.000196713	0.00041227	46.3623	NM_145260.2
GO:0043568	positive regulation of insulin-like growth factor receptor signaling pathway	biological_process	2	304	37	98659	0.000208258	0.000435448	17.5425	NM_020702.4;XM_011517966.1
GO:0006954	inflammatory response	biological_process	14	304	1649	98659	0.00022234	0.000463811	2.75531	NM_001145412.2;NM_001145413.2;NM_001164692.2;NM_019839.4;NM_198565.2;XM_005267891.2;XM_005268435.3;XM_011541773.1;XM_011541774.1;XM_011541776.1;XM_011541777.1;XM_011541778.1;XM_011541779.1;XM_011541780.1
GO:0036499	PERK-mediated unfolded protein response	biological_process	2	304	38	98659	0.000225594	0.000469507	17.0809	NM_001145412.2;NM_001145413.2
GO:0031594	neuromuscular junction	cellular_component	6	304	393	98659	0.000243712	0.000502809	4.95475	NM_001242902.1;NM_001242903.1;NM_003488.3;XM_005257707.1;XM_005257709.1;XM_011525318.1
GO:0006910	phagocytosis, recognition	biological_process	2	304	39	98659	0.000243837	0.000502809	16.6429	NM_020070.3;XM_011530169.1
GO:0044304	main axon	cellular_component	2	304	39	98659	0.000243837	0.000502809	16.6429	XM_006718211.1;XM_006718213.1
GO:1990812	growth cone filopodium	cellular_component	2	304	39	98659	0.000243837	0.000502809	16.6429	XM_006718211.1;XM_006718213.1
GO:0072210	metanephric nephron development	biological_process	1	304	8	98659	0.000261749	0.000538507	40.567	NM_004472.2
GO:0016363	nuclear matrix	cellular_component	8	304	672	98659	0.000275093	0.000564665	3.86353	XM_011513250.1;XM_011541773.1;XM_011541774.1;XM_011541776.1;XM_011541777.1;XM_011541778.1;XM_011541779.1;XM_011541780.1
GO:0006919	activation of cysteine-type endopeptidase activity involved in apoptotic process	biological_process	7	304	535	98659	0.00028927	0.00059241	4.24627	NM_001291428.1;NM_001291431.1;NM_138761.3;NM_138763.3;NM_138764.4;XM_006723314.2;XM_011527191.1
GO:0009083	branched-chain amino acid catabolic process	biological_process	3	304	102	98659	0.000296161	0.00060514	9.54518	NM_001122957.2;NM_001271926.1;NM_005881.3
GO:0016338	calcium-independent cell-cell adhesion via plasma membrane cell-adhesion molecules	biological_process	2	304	42	98659	0.00030421	0.000620174	15.4541	NM_001130861.1;NM_003277.3
GO:0030206	chondroitin sulfate biosynthetic process	biological_process	3	304	103	98659	0.000307385	0.000625225	9.45251	NM_021948.4;NM_198427.1;XM_011509866.1
GO:0030048	actin filament-based movement	biological_process	3	304	105	98659	0.000330741	0.00067121	9.27246	NM_000377.2;XM_011511213.1;XM_011543977.1
GO:0071805	potassium ion transmembrane transport	biological_process	7	304	547	98659	0.000335098	0.000678506	4.15311	NM_001267812.1;NM_001267814.1;NM_020246.3;XM_005250502.2;XM_006716054.2;XM_006716055.2;XM_011516414.1
GO:0043532	angiostatin binding	molecular_function	1	304	9	98659	0.000335849	0.000678506	36.0596	NM_178191.2
GO:0035035	histone acetyltransferase binding	molecular_function	4	304	191	98659	0.000338386	0.000682094	6.79657	NM_015898.2;XM_005259570.3;XM_005259571.3;XM_005259572.2
GO:0001206	transcriptional repressor activity, RNA polymerase II distal enhancer sequence-specific binding	molecular_function	2	304	44	98659	0.00034936	0.000702636	14.7516	NM_001186.3;NM_206866.2
GO:0005540	hyaluronic acid binding	molecular_function	3	304	109	98659	0.000381223	0.000765004	8.93219	NM_021948.4;NM_198427.1;XM_011509866.1
GO:0030203	glycosaminoglycan metabolic process	biological_process	3	304	113	98659	0.000436982	0.000874939	8.616	NM_021948.4;NM_198427.1;XM_011509866.1
GO:0090184	positive regulation of kidney development	biological_process	1	304	11	98659	0.000511014	0.00102089	29.5033	NM_004472.2
GO:0005484	SNAP receptor activity	molecular_function	4	304	211	98659	0.000532318	0.00106109	6.15234	NM_053052.3;XM_005273041.3;XM_005273044.2;XM_006711734.2
GO:2000601	positive regulation of Arp2/3 complex-mediated actin nucleation	biological_process	2	304	51	98659	0.000540654	0.00107531	12.7269	NM_000377.2;XM_011543977.1
GO:1990761	growth cone lamellipodium	cellular_component	2	304	52	98659	0.000572452	0.00113604	12.4822	XM_006718211.1;XM_006718213.1
GO:0098542	defense response to other organism	biological_process	1	304	12	98659	0.000611969	0.00121178	27.0447	NM_198565.2
GO:0021800	cerebral cortex tangential migration	biological_process	1	304	13	98659	0.000721763	0.00142604	24.9643	XM_011518522.1
GO:0000976	transcription regulatory region sequence-specific DNA binding	molecular_function	4	304	226	98659	0.000725189	0.00142966	5.744	NM_001145412.2;NM_001145413.2;XM_011531513.1;XM_011531514.1
GO:0005200	structural constituent of cytoskeleton	molecular_function	7	304	619	98659	0.00075042	0.00147616	3.67004	NM_018424.3;NM_019114.4;XM_011518790.1;XM_011518791.1;XM_011518792.1;XM_011518793.1;XM_011518794.1
GO:0005794	Golgi apparatus	cellular_component	28	304	4953	98659	0.000785094	0.00154098	1.83465	NM_001083607.1;NM_015097.2;XM_005253166.1;XM_006713036.1;XM_006713040.1;XM_006713041.1;XM_006713042.1;XM_006713048.1;XM_006713049.1;XM_006713050.1;XM_006713052.1;XM_006713053.1;XM_006713060.1;XM_006718346.1;XM_011513250.1;XM_011533505.1;XM_011533506.1;XM_011533507.1;XM_011533508.1;XM_011533509.1;XM_011533510.1;XM_011533511.1;XM_011533512.1;XM_011533513.1;XM_011533514.1;XM_011533515.1;XM_011533516…
GO:0045995	regulation of embryonic development	biological_process	2	304	59	98659	0.00082878	0.00162318	11.0012	NM_001145412.2;NM_001145413.2
GO:0034755	iron ion transmembrane transport	biological_process	1	304	14	98659	0.000840344	0.00163158	23.1812	NM_020533.2
GO:0036023	embryonic skeletal limb joint morphogenesis	biological_process	1	304	14	98659	0.000840344	0.00163158	23.1812	NM_145260.2
GO:0072498	embryonic skeletal joint development	biological_process	1	304	14	98659	0.000840344	0.00163158	23.1812	NM_145260.2
GO:1903578	regulation of ATP metabolic process	biological_process	1	304	14	98659	0.000840344	0.00163158	23.1812	NM_178191.2
GO:1902176	negative regulation of oxidative stress-induced intrinsic apoptotic signaling pathway	biological_process	2	304	60	98659	0.00087042	0.00168632	10.8179	NM_001145412.2;NM_001145413.2
GO:0008528	G-protein coupled peptide receptor activity	molecular_function	2	304	62	98659	0.000957629	0.00184921	10.4689	NM_001164692.2;NM_019839.4
GO:0042981	regulation of apoptotic process	biological_process	9	304	968	98659	0.000958623	0.00184921	3.01738	NM_001291428.1;NM_001291431.1;NM_052813.4;NM_052814.3;NM_138761.3;NM_138763.3;NM_138764.4;XM_006723314.2;XM_011527191.1
GO:0031982	vesicle	cellular_component	7	304	656	98659	0.00108647	0.00209134	3.46304	XM_011541773.1;XM_011541774.1;XM_011541776.1;XM_011541777.1;XM_011541778.1;XM_011541779.1;XM_011541780.1
GO:0032495	response to muramyl dipeptide	biological_process	2	304	65	98659	0.0010985	0.00210546	9.98573	NM_052813.4;NM_052814.3
GO:0050700	CARD domain binding	molecular_function	2	304	65	98659	0.0010985	0.00210546	9.98573	NM_052813.4;NM_052814.3
GO:0031966	mitochondrial membrane	cellular_component	5	304	372	98659	0.0011242	0.00215013	4.36205	NM_001098537.2;NM_152286.4;XM_006717102.1;XM_006717104.2;XM_011518664.1
GO:0030194	positive regulation of blood coagulation	biological_process	2	304	67	98659	0.0011993	0.00228887	9.68765	NM_001145412.2;NM_001145413.2
GO:0072162	metanephric mesenchymal cell differentiation	biological_process	1	304	17	98659	0.00124825	0.0023722	19.0904	NM_145260.2
GO:0021853	cerebral cortex GABAergic interneuron migration	biological_process	1	304	17	98659	0.00124825	0.0023722	19.0904	XM_011518522.1
GO:0005119	smoothened binding	molecular_function	1	304	18	98659	0.00140143	0.00265767	18.0298	NM_001083607.1
GO:0043524	negative regulation of neuron apoptotic process	biological_process	7	304	684	98659	0.0014131	0.00267416	3.32128	NM_001291428.1;NM_001291431.1;NM_138761.3;NM_138763.3;NM_138764.4;XM_006723314.2;XM_011527191.1
GO:0001078	transcriptional repressor activity, RNA polymerase II core promoter proximal region sequence-specific binding	molecular_function	6	304	536	98659	0.00149822	0.00282927	3.63287	NM_001186.3;NM_015898.2;NM_206866.2;XM_005259570.3;XM_005259571.3;XM_005259572.2
GO:0005515	protein binding	molecular_function	182	304	50892	98659	0.00152144	0.00286708	1.16061	NM_000377.2;NM_001042476.2;NM_001083607.1;NM_001098623.2;NM_001122957.2;NM_001130848.1;NM_001144772.1;NM_001145412.2;NM_001145413.2;NM_001161441.1;NM_001161442.1;NM_001161443.1;NM_001161444.1;NM_001186.3;NM_001197297.1;NM_001242902.1;NM_001242903.1;NM_001271223.2;NM_001271926.1;NM_001278260.1;NM_001278261.1;NM_001278262.1;NM_001278263.1;NM_001278264.1;NM_001278265.1;NM_001278266.1;NM_001291428.1;…
GO:0010157	response to chlorate	biological_process	1	304	19	98659	0.00156312	0.00293329	17.0809	NM_001083607.1
GO:0072203	cell proliferation involved in metanephros development	biological_process	1	304	19	98659	0.00156312	0.00293329	17.0809	NM_001083607.1
GO:0008154	actin polymerization or depolymerization	biological_process	2	304	76	98659	0.0017244	0.00322919	8.54043	NM_000377.2;XM_011543977.1
GO:0097108	hedgehog family protein binding	molecular_function	1	304	20	98659	0.00173327	0.00323904	16.2268	NM_001083607.1
GO:0031648	protein destabilization	biological_process	3	304	165	98659	0.00178318	0.00331849	5.90066	NM_001080414.3;XM_005267691.3;XM_011536796.1
GO:0070064	proline-rich region binding	molecular_function	3	304	165	98659	0.00178318	0.00331849	5.90066	NM_018842.4;XM_006718211.1;XM_006718213.1
GO:0071498	cellular response to fluid shear stress	biological_process	2	304	78	98659	0.00185764	0.00344277	8.32144	NM_001145412.2;NM_001145413.2
GO:0006414	translational elongation	biological_process	2	304	78	98659	0.00185764	0.00344277	8.32144	NM_003321.4;XM_011545928.1
GO:0061005	cell differentiation involved in kidney development	biological_process	1	304	21	98659	0.00191182	0.00352137	15.4541	NM_001083607.1
GO:1903052	positive regulation of proteolysis involved in cellular protein catabolic process	biological_process	1	304	21	98659	0.00191182	0.00352137	15.4541	NM_178191.2
GO:0050119	N-acetylglucosamine deacetylase activity	molecular_function	1	304	21	98659	0.00191182	0.00352137	15.4541	XM_005268435.3
GO:0005381	iron ion transmembrane transporter activity	molecular_function	1	304	22	98659	0.00209873	0.00385771	14.7516	NM_020533.2
GO:0043330	response to exogenous dsRNA	biological_process	2	304	82	98659	0.00214297	0.00393097	7.91552	NM_052813.4;NM_052814.3
GO:0043967	histone H4 acetylation	biological_process	3	304	175	98659	0.0022076	0.00404126	5.56348	XM_006718211.1;XM_006718213.1;XM_011513250.1
GO:0051092	positive regulation of NF-kappaB transcription factor activity	biological_process	7	304	736	98659	0.00222328	0.00406167	3.08662	XM_011541773.1;XM_011541774.1;XM_011541776.1;XM_011541777.1;XM_011541778.1;XM_011541779.1;XM_011541780.1
GO:0001764	neuron migration	biological_process	7	304	737	98659	0.00224181	0.00408721	3.08243	NM_001291428.1;NM_001291431.1;NM_138761.3;NM_138763.3;NM_138764.4;XM_006723314.2;XM_011527191.1
GO:0000271	polysaccharide biosynthetic process	biological_process	1	304	24	98659	0.00249741	0.00453476	13.5223	XM_005268435.3
GO:0097255	R2TP complex	cellular_component	1	304	24	98659	0.00249741	0.00453476	13.5223	XM_011513250.1
GO:0031201	SNARE complex	cellular_component	4	304	300	98659	0.00251469	0.00455693	4.32715	NM_053052.3;XM_005273041.3;XM_005273044.2;XM_006711734.2
GO:0000083	regulation of transcription involved in G1/S transition of mitotic cell cycle	biological_process	2	304	89	98659	0.00270483	0.00487958	7.29295	NM_001186.3;NM_206866.2
GO:0009957	epidermal cell fate specification	biological_process	1	304	25	98659	0.00270906	0.00487958	12.9814	NM_001083607.1
GO:0072207	metanephric epithelium development	biological_process	1	304	25	98659	0.00270906	0.00487958	12.9814	NM_145260.2
GO:0006979	response to oxidative stress	biological_process	5	304	445	98659	0.00275519	0.00495273	3.64647	NM_012293.2;XM_005264707.2;XM_011510395.1;XM_011510396.1;XM_011510397.1
GO:0001932	regulation of protein phosphorylation	biological_process	3	304	191	98659	0.00302369	0.0054245	5.09743	NM_001080414.3;XM_005267691.3;XM_011536796.1
GO:0060021	palate development	biological_process	5	304	456	98659	0.00310483	0.00555896	3.55851	NM_001130861.1;NM_003277.3;NM_032199.2;NM_145260.2;XM_011540262.1
GO:0008585	female gonad development	biological_process	2	304	94	98659	0.00315673	0.00561827	6.90503	NM_032199.2;XM_011540262.1
GO:0008158	hedgehog receptor activity	molecular_function	1	304	27	98659	0.00315676	0.00561827	12.0199	NM_001083607.1
GO:0015016	[heparan sulfate]-glucosamine N-sulfotransferase activity	molecular_function	1	304	27	98659	0.00315676	0.00561827	12.0199	XM_005268435.3
GO:0008285	negative regulation of cell proliferation	biological_process	14	304	2165	98659	0.00329253	0.00584831	2.09862	NM_004184.3;NM_173701.1;NM_213645.1;NM_213646.1;XM_005268044.2;XM_006720249.2;XM_011523413.1;XM_011531513.1;XM_011531514.1;XM_011537133.1;XM_011537134.1;XM_011537135.1;XM_011537136.1;XM_011537137.1
GO:0045606	positive regulation of epidermal cell differentiation	biological_process	1	304	28	98659	0.00339269	0.00600245	11.5906	NM_001083607.1
GO:0072075	metanephric mesenchyme development	biological_process	1	304	28	98659	0.00339269	0.00600245	11.5906	NM_145260.2
GO:0010039	response to iron ion	biological_process	2	304	97	98659	0.00344875	0.00608962	6.69147	XM_006718211.1;XM_006718213.1
GO:0006477	protein sulfation	biological_process	1	304	29	98659	0.00363661	0.00640872	11.1909	XM_005268435.3
GO:0048741	skeletal muscle fiber development	biological_process	2	304	100	98659	0.00375676	0.00660748	6.49072	NM_020702.4;XM_011517966.1
GO:2000352	negative regulation of endothelial cell apoptotic process	biological_process	2	304	101	98659	0.00386303	0.00678109	6.42646	NM_001145412.2;NM_001145413.2
GO:0005113	patched binding	molecular_function	1	304	30	98659	0.00388847	0.00678591	10.8179	NM_001083607.1
GO:0060603	mammary gland duct morphogenesis	biological_process	1	304	30	98659	0.00388847	0.00678591	10.8179	NM_001083607.1
GO:0046626	regulation of insulin receptor signaling pathway	biological_process	1	304	30	98659	0.00388847	0.00678591	10.8179	NM_018842.4
GO:0003746	translation elongation factor activity	molecular_function	2	304	102	98659	0.00397112	0.00691668	6.36345	NM_003321.4;XM_011545928.1
GO:0032154	cleavage furrow	cellular_component	4	304	337	98659	0.00411994	0.00716198	3.85206	NM_001130848.1;NM_004910.2;XM_011545396.1;XM_011545397.1
GO:0021997	neural plate axis specification	biological_process	1	304	31	98659	0.00414822	0.0071833	10.4689	NM_001083607.1
GO:0072345	NAADP-sensitive calcium-release channel activity	molecular_function	1	304	31	98659	0.00414822	0.0071833	10.4689	NM_020533.2
GO:0000980	RNA polymerase II distal enhancer sequence-specific DNA binding	molecular_function	4	304	342	98659	0.00438228	0.007574	3.79574	NM_001145412.2;NM_001145413.2;NM_001186.3;NM_206866.2
GO:0051882	mitochondrial depolarization	biological_process	1	304	32	98659	0.0044158	0.00761726	10.1418	NM_178191.2
GO:0030695	GTPase regulator activity	molecular_function	2	304	107	98659	0.00453911	0.00779996	6.0661	NM_000377.2;XM_011543977.1
GO:0032874	positive regulation of stress-activated MAPK cascade	biological_process	2	304	107	98659	0.00453911	0.00779996	6.0661	NM_052813.4;NM_052814.3
GO:0010761	fibroblast migration	biological_process	2	304	108	98659	0.00465828	0.00798944	6.00993	NM_032199.2;XM_011540262.1
GO:0045653	negative regulation of megakaryocyte differentiation	biological_process	1	304	33	98659	0.00469117	0.0080305	9.83443	NM_001197297.1
GO:0018105	peptidyl-serine phosphorylation	biological_process	7	304	835	98659	0.00473593	0.00809168	2.72066	XM_011541773.1;XM_011541774.1;XM_011541776.1;XM_011541777.1;XM_011541778.1;XM_011541779.1;XM_011541780.1
GO:0005578	proteinaceous extracellular matrix	cellular_component	8	304	1025	98659	0.00493089	0.00840876	2.53297	NM_012293.2;NM_021948.4;NM_198427.1;XM_005264707.2;XM_011509866.1;XM_011510395.1;XM_011510396.1;XM_011510397.1
GO:0071799	cellular response to prostaglandin D stimulus	biological_process	1	304	34	98659	0.00497428	0.00846665	9.54518	XM_005267891.2
GO:0030325	adrenal gland development	biological_process	2	304	112	98659	0.00515382	0.00875564	5.79529	NM_032199.2;XM_011540262.1
GO:0032403	protein complex binding	molecular_function	10	304	1425	98659	0.00516669	0.00876091	2.27745	NM_001083607.1;NM_001291428.1;NM_001291431.1;NM_138761.3;NM_138763.3;NM_138764.4;XM_006718211.1;XM_006718213.1;XM_006723314.2;XM_011527191.1
GO:0048156	tau protein binding	molecular_function	2	304	115	98659	0.00554551	0.00938055	5.64411	XM_006718211.1;XM_006718213.1
GO:0044294	dendritic growth cone	cellular_component	1	304	36	98659	0.00556349	0.00938055	9.01489	NM_001083607.1
GO:0030238	male sex determination	biological_process	1	304	36	98659	0.00556349	0.00938055	9.01489	XM_005267891.2
GO:0006911	phagocytosis, engulfment	biological_process	2	304	116	98659	0.00567992	0.0095589	5.59545	NM_020070.3;XM_011530169.1
GO:0051782	negative regulation of cell division	biological_process	1	304	37	98659	0.00586951	0.00984102	8.77125	NM_001083607.1
GO:2000543	positive regulation of gastrulation	biological_process	1	304	37	98659	0.00586951	0.00984102	8.77125	NM_145260.2
GO:0006958	complement activation, classical pathway	biological_process	2	304	118	98659	0.00595459	0.00994649	5.50061	NM_020070.3;XM_011530169.1
GO:0048468	cell development	biological_process	2	304	118	98659	0.00595459	0.00994649	5.50061	NM_032199.2;XM_011540262.1
GO:0007089	traversing start control point of mitotic cell cycle	biological_process	1	304	38	98659	0.00618306	0.0103089	8.54043	XM_011523413.1
GO:0007568	aging	biological_process	7	304	878	98659	0.00633971	0.0105505	2.58742	NM_001291428.1;NM_001291431.1;NM_138761.3;NM_138763.3;NM_138764.4;XM_006723314.2;XM_011527191.1
GO:0043621	protein self-association	molecular_function	3	304	236	98659	0.00636899	0.0105796	4.12546	NM_001080414.3;XM_005267691.3;XM_011536796.1
GO:0007043	cell-cell junction assembly	biological_process	2	304	121	98659	0.00638126	0.0105804	5.36423	NM_001130861.1;NM_003277.3
GO:0001655	urogenital system development	biological_process	1	304	39	98659	0.0065041	0.0107246	8.32144	NM_145260.2
GO:0030431	sleep	biological_process	1	304	39	98659	0.0065041	0.0107246	8.32144	XM_005267891.2
GO:0021799	cerebral cortex radially oriented cell migration	biological_process	1	304	39	98659	0.0065041	0.0107246	8.32144	XM_011518522.1
GO:0033234	negative regulation of protein sumoylation	biological_process	1	304	41	98659	0.00716844	0.0117983	7.91552	NM_006339.2
GO:0070374	positive regulation of ERK1 and ERK2 cascade	biological_process	7	304	901	98659	0.00735111	0.0120768	2.52137	XM_011541773.1;XM_011541774.1;XM_011541776.1;XM_011541777.1;XM_011541778.1;XM_011541779.1;XM_011541780.1
GO:0009396	folic acid-containing compound biosynthetic process	biological_process	1	304	42	98659	0.00751165	0.012318	7.72705	NM_178191.2
GO:0030198	extracellular matrix organization	biological_process	8	304	1102	98659	0.00775246	0.0126897	2.35598	NM_012293.2;NM_021948.4;NM_198427.1;XM_005264707.2;XM_011509866.1;XM_011510395.1;XM_011510396.1;XM_011510397.1
GO:0035137	hindlimb morphogenesis	biological_process	1	304	43	98659	0.00786216	0.0128458	7.54735	NM_001083607.1
GO:0006955	immune response	biological_process	10	304	1517	98659	0.00806972	0.013161	2.13933	NM_000377.2;NM_012293.2;NM_020070.3;NM_198565.2;XM_005264707.2;XM_011510395.1;XM_011510396.1;XM_011510397.1;XM_011530169.1;XM_011543977.1
GO:0046982	protein heterodimerization activity	molecular_function	13	304	2171	98659	0.00812708	0.0132305	1.94333	NM_001197297.1;NM_001291428.1;NM_001291431.1;NM_005068.2;NM_006339.2;NM_138761.3;NM_138763.3;NM_138764.4;XM_005267100.2;XM_006723314.2;XM_011527191.1;XM_011536072.1;XM_011536073.1
GO:0030414	peptidase inhibitor activity	molecular_function	1	304	44	98659	0.00821991	0.0133332	7.37582	NM_198455.2
GO:0046085	adenosine metabolic process	biological_process	1	304	44	98659	0.00821991	0.0133332	7.37582	XM_005267891.2
GO:0030041	actin filament polymerization	biological_process	2	304	134	98659	0.00843782	0.013662	4.84382	NM_000377.2;XM_011543977.1
GO:0007268	synaptic transmission	biological_process	9	304	1329	98659	0.00887166	0.0143385	2.19776	NM_000830.3;NM_004886.3;NM_175611.2;XM_005260942.1;XM_005260943.1;XM_005260944.2;XM_006722950.2;XM_006722951.2;XM_006723991.1
GO:0032580	Golgi cisterna membrane	cellular_component	4	304	407	98659	0.00895534	0.014354	3.18954	NM_001130848.1;NM_004910.2;XM_011545396.1;XM_011545397.1
GO:2000304	positive regulation of ceramide biosynthetic process	biological_process	1	304	46	98659	0.00895697	0.014354	7.05513	NM_001144772.1
GO:1903214	regulation of protein targeting to mitochondrion	biological_process	1	304	46	98659	0.00895697	0.014354	7.05513	NM_178191.2
GO:0012506	vesicle membrane	cellular_component	2	304	137	98659	0.00896123	0.014354	4.73775	NM_000377.2;XM_011543977.1
GO:0042149	cellular response to glucose starvation	biological_process	2	304	137	98659	0.00896123	0.014354	4.73775	NM_001145412.2;NM_001145413.2
GO:0014069	postsynaptic density	cellular_component	8	304	1131	98659	0.00908609	0.014528	2.29557	NM_001083607.1;NM_021020.3;XM_005273394.3;XM_011544383.1;XM_011544384.1;XM_011544385.1;XM_011544386.1;XM_011544387.1
GO:0040015	negative regulation of multicellular organism growth	biological_process	1	304	47	98659	0.00933617	0.0148749	6.90503	NM_001083607.1
GO:0008406	gonad development	biological_process	1	304	47	98659	0.00933617	0.0148749	6.90503	NM_145260.2
GO:0098793	presynapse	cellular_component	4	304	415	98659	0.00968343	0.0154008	3.12806	NM_053052.3;XM_005273041.3;XM_005273044.2;XM_006711734.2
GO:0001823	mesonephros development	biological_process	1	304	49	98659	0.0101157	0.0160032	6.62319	NM_145260.2
GO:0005753	mitochondrial proton-transporting ATP synthase complex	cellular_component	1	304	49	98659	0.0101157	0.0160032	6.62319	NM_178191.2
GO:0010466	negative regulation of peptidase activity	biological_process	1	304	49	98659	0.0101157	0.0160032	6.62319	NM_198455.2
GO:0000812	Swr1 complex	cellular_component	1	304	51	98659	0.0109231	0.01725	6.36345	XM_011513250.1
GO:0006626	protein targeting to mitochondrion	biological_process	2	304	148	98659	0.0110406	0.0173744	4.38562	NM_001134484.1;NM_001134485.1
GO:0061418	regulation of transcription from RNA polymerase II promoter in response to hypoxia	biological_process	2	304	148	98659	0.0110406	0.0173744	4.38562	NM_001186.3;NM_206866.2
GO:0045727	positive regulation of translation	biological_process	3	304	278	98659	0.0111426	0.0175043	3.50219	NM_052966.3;XM_011509140.1;XM_011509141.1
GO:0030857	negative regulation of epithelial cell differentiation	biological_process	1	304	52	98659	0.0113371	0.0177787	6.24108	NM_145260.2
GO:0008603	cAMP-dependent protein kinase regulator activity	molecular_function	1	304	53	98659	0.011758	0.0183744	6.12332	NM_001164760.1
GO:0032780	negative regulation of ATPase activity	biological_process	1	304	53	98659	0.011758	0.0183744	6.12332	NM_178191.2
GO:0031463	Cul3-RING ubiquitin ligase complex	cellular_component	3	304	285	98659	0.0121122	0.018895	3.41617	NM_001186.3;NM_153270.2;NM_206866.2
GO:0048793	pronephros development	biological_process	1	304	54	98659	0.0121856	0.0189766	6.00993	NM_145260.2
GO:2000480	negative regulation of cAMP-dependent protein kinase activity	biological_process	1	304	55	98659	0.01262	0.0196189	5.90066	NM_001164760.1
GO:0060272	embryonic skeletal joint morphogenesis	biological_process	1	304	56	98659	0.013061	0.0202695	5.79529	NM_145260.2
GO:0021766	hippocampus development	biological_process	3	304	294	98659	0.013436	0.0208154	3.31159	NM_021948.4;NM_198427.1;XM_011509866.1
GO:0030210	heparin biosynthetic process	biological_process	1	304	57	98659	0.0135087	0.0208644	5.69362	XM_005268435.3
GO:0005737	cytoplasm	cellular_component	110	304	30038	98659	0.0135142	0.0208644	1.18846	NM_001080414.3;NM_001130848.1;NM_001144772.1;NM_001145412.2;NM_001145413.2;NM_001161441.1;NM_001161442.1;NM_001161443.1;NM_001161444.1;NM_001186.3;NM_001243079.1;NM_003975.3;NM_004184.3;NM_004910.2;NM_015097.2;NM_018424.3;NM_018842.4;NM_019114.4;NM_020533.2;NM_021020.3;NM_052813.4;NM_052814.3;NM_052966.3;NM_138477.2;NM_173701.1;NM_198488.3;NM_206866.2;NM_213645.1;NM_213646.1;XM_005250887.2;XM_005…
GO:0007194	negative regulation of adenylate cyclase activity	biological_process	2	304	162	98659	0.0140576	0.0216661	4.00662	NM_001164692.2;NM_019839.4
GO:0005952	cAMP-dependent protein kinase complex	cellular_component	1	304	59	98659	0.0144239	0.0221545	5.50061	NM_001164760.1
GO:0048702	embryonic neurocranium morphogenesis	biological_process	1	304	59	98659	0.0144239	0.0221545	5.50061	XM_005268435.3
GO:0060612	adipose tissue development	biological_process	2	304	166	98659	0.014997	0.0229953	3.91007	NM_032199.2;XM_011540262.1
GO:0004672	protein kinase activity	molecular_function	8	304	1232	98659	0.0151129	0.0231336	2.10738	NM_001243079.1;XM_011541773.1;XM_011541774.1;XM_011541776.1;XM_011541777.1;XM_011541778.1;XM_011541779.1;XM_011541780.1
GO:0045739	positive regulation of DNA repair	biological_process	2	304	167	98659	0.0152372	0.0232841	3.88666	XM_006718211.1;XM_006718213.1
GO:0030968	endoplasmic reticulum unfolded protein response	biological_process	2	304	168	98659	0.0154796	0.0236132	3.86353	NM_001145412.2;NM_001145413.2
GO:0005796	Golgi lumen	cellular_component	3	304	307	98659	0.0155052	0.0236132	3.17136	NM_021948.4;NM_198427.1;XM_011509866.1
GO:0061053	somite development	biological_process	1	304	63	98659	0.0163319	0.0248301	5.15137	NM_001083607.1
GO:0042645	mitochondrial nucleoid	cellular_component	2	304	172	98659	0.0164711	0.0249992	3.77368	NM_003321.4;XM_011545928.1
GO:1904874	positive regulation of telomerase RNA localization to Cajal body	biological_process	1	304	64	98659	0.0168249	0.0254931	5.07088	XM_011513250.1
GO:0051017	actin filament bundle assembly	biological_process	2	304	174	98659	0.0169798	0.0256845	3.7303	NM_018842.4;XM_011511213.1
GO:0071397	cellular response to cholesterol	biological_process	1	304	65	98659	0.0173241	0.0261612	4.99286	NM_001083607.1
GO:2000379	positive regulation of reactive oxygen species metabolic process	biological_process	2	304	176	98659	0.0174973	0.0263341	3.68791	NM_001145412.2;NM_001145413.2
GO:0003823	antigen binding	molecular_function	2	304	176	98659	0.0174973	0.0263341	3.68791	NM_020070.3;XM_011530169.1
GO:0007399	nervous system development	biological_process	10	304	1704	98659	0.0177328	0.0266438	1.90456	NM_000830.3;NM_005068.2;NM_175611.2;XM_005260942.1;XM_005260943.1;XM_005260944.2;XM_005267100.2;XM_006723991.1;XM_011536072.1;XM_011536073.1
GO:0060644	mammary gland epithelial cell differentiation	biological_process	1	304	66	98659	0.0178296	0.0266998	4.91721	NM_001083607.1
GO:0072001	renal system development	biological_process	1	304	66	98659	0.0178296	0.0266998	4.91721	NM_001083607.1
GO:0021532	neural tube patterning	biological_process	1	304	67	98659	0.0183413	0.0274203	4.84382	NM_001083607.1
GO:0019905	syntaxin binding	molecular_function	4	304	489	98659	0.018421	0.0274936	2.65469	NM_053052.3;XM_005273041.3;XM_005273044.2;XM_006711734.2
GO:0048008	platelet-derived growth factor receptor signaling pathway	biological_process	2	304	182	98659	0.0191022	0.028463	3.56633	NM_032199.2;XM_011540262.1
GO:0004862	cAMP-dependent protein kinase inhibitor activity	molecular_function	1	304	69	98659	0.0193832	0.028786	4.70342	NM_001164760.1
GO:0034236	protein kinase A catalytic subunit binding	molecular_function	1	304	69	98659	0.0193832	0.028786	4.70342	NM_001164760.1
GO:0043616	keratinocyte proliferation	biological_process	1	304	70	98659	0.0199133	0.0295243	4.63623	NM_001083607.1
GO:0010875	positive regulation of cholesterol efflux	biological_process	1	304	71	98659	0.0204494	0.0302691	4.57093	NM_001083607.1
GO:0032993	protein-DNA complex	cellular_component	2	304	189	98659	0.0210742	0.0311427	3.43425	NM_001145412.2;NM_001145413.2
GO:0001933	negative regulation of protein phosphorylation	biological_process	3	304	340	98659	0.0216225	0.0319003	2.86355	NM_052966.3;XM_011509140.1;XM_011509141.1
GO:0031012	extracellular matrix	cellular_component	5	304	697	98659	0.0218612	0.0321995	2.32809	NM_012293.2;XM_005264707.2;XM_011510395.1;XM_011510396.1;XM_011510397.1
GO:0008301	DNA binding, bending	molecular_function	1	304	74	98659	0.0220934	0.032382	4.38562	NM_004472.2
GO:0051764	actin crosslink formation	biological_process	1	304	74	98659	0.0220934	0.032382	4.38562	NM_018842.4
GO:0048703	embryonic viscerocranium morphogenesis	biological_process	1	304	74	98659	0.0220934	0.032382	4.38562	XM_005268435.3
GO:0001102	RNA polymerase II activating transcription factor binding	molecular_function	2	304	196	98659	0.0231537	0.0338807	3.31159	NM_001145412.2;NM_001145413.2
GO:0032760	positive regulation of tumor necrosis factor production	biological_process	2	304	197	98659	0.0234595	0.0342723	3.29478	NM_052813.4;NM_052814.3
GO:0009617	response to bacterium	biological_process	1	304	77	98659	0.0237903	0.0346991	4.21476	NM_018842.4
GO:0050853	B cell receptor signaling pathway	biological_process	2	304	205	98659	0.0259851	0.0377773	3.16621	NM_020070.3;XM_011530169.1
GO:0050714	positive regulation of protein secretion	biological_process	2	304	205	98659	0.0259851	0.0377773	3.16621	XM_006718211.1;XM_006718213.1
GO:2000045	regulation of G1/S transition of mitotic cell cycle	biological_process	1	304	81	98659	0.0261331	0.037931	4.00662	NM_001243079.1
GO:0060831	smoothened signaling pathway involved in dorsal/ventral neural tube patterning	biological_process	1	304	82	98659	0.0267328	0.0387389	3.95776	NM_001083607.1
GO:0005768	endosome	cellular_component	7	304	1148	98659	0.0271895	0.0393371	1.97888	XM_011541773.1;XM_011541774.1;XM_011541776.1;XM_011541777.1;XM_011541778.1;XM_011541779.1;XM_011541780.1
GO:0003151	outflow tract morphogenesis	biological_process	2	304	210	98659	0.0276346	0.0399167	3.09082	NM_001130861.1;NM_003277.3
GO:0034976	response to endoplasmic reticulum stress	biological_process	3	304	368	98659	0.0278242	0.0401259	2.64568	NM_052966.3;XM_011509140.1;XM_011509141.1
GO:0016477	cell migration	biological_process	7	304	1155	98659	0.0280412	0.0403739	1.96689	XM_011541773.1;XM_011541774.1;XM_011541776.1;XM_011541777.1;XM_011541778.1;XM_011541779.1;XM_011541780.1
GO:0048705	skeletal system morphogenesis	biological_process	2	304	212	98659	0.0283097	0.0406953	3.06166	NM_032199.2;XM_011540262.1
GO:0005759	mitochondrial matrix	cellular_component	9	304	1607	98659	0.0287457	0.0412504	1.81756	NM_001122957.2;NM_001242902.1;NM_001242903.1;NM_001271926.1;NM_003488.3;NM_005881.3;XM_005257707.1;XM_005257709.1;XM_011525318.1
GO:0043086	negative regulation of catalytic activity	biological_process	3	304	372	98659	0.0287879	0.0412504	2.61723	NM_004886.3;XM_006722950.2;XM_006722951.2
GO:0035999	tetrahydrofolate interconversion	biological_process	1	304	86	98659	0.0291869	0.0417554	3.77368	NM_178191.2
GO:0060037	pharyngeal system development	biological_process	1	304	87	98659	0.029814	0.0425169	3.7303	NM_001083607.1
GO:0003279	cardiac septum development	biological_process	1	304	87	98659	0.029814	0.0425169	3.7303	XM_005268435.3
GO:0015012	heparan sulfate proteoglycan biosynthetic process	biological_process	1	304	88	98659	0.0304464	0.0433499	3.68791	XM_005268435.3
GO:0006801	superoxide metabolic process	biological_process	1	304	89	98659	0.0310842	0.0441878	3.64647	NM_198565.2
GO:0030496	midbody	cellular_component	5	304	765	98659	0.0323349	0.0458779	2.12115	NM_001083607.1;NM_001130848.1;NM_004910.2;XM_011545396.1;XM_011545397.1
GO:0001709	cell fate determination	biological_process	1	304	91	98659	0.0323754	0.0458779	3.56633	NM_001083607.1
GO:0022617	extracellular matrix disassembly	biological_process	3	304	388	98659	0.0328394	0.046462	2.5093	NM_021948.4;NM_198427.1;XM_011509866.1
GO:0021522	spinal cord motor neuron differentiation	biological_process	1	304	93	98659	0.0336874	0.047512	3.48964	NM_001083607.1
GO:0006672	ceramide metabolic process	biological_process	1	304	93	98659	0.0336874	0.047512	3.48964	NM_001144772.1
GO:0032755	positive regulation of interleukin-6 production	biological_process	2	304	231	98659	0.0351565	0.0495061	2.80984	NM_052813.4;NM_052814.3
GO:0035108	limb morphogenesis	biological_process	1	304	96	98659	0.0356938	0.0501839	3.38059	NM_001083607.1
GO:0048568	embryonic organ development	biological_process	1	304	98	98659	0.0370564	0.0520182	3.31159	NM_001083607.1
GO:0043968	histone H2A acetylation	biological_process	1	304	99	98659	0.0377452	0.0529022	3.27814	XM_011513250.1
GO:0030864	cortical actin cytoskeleton	cellular_component	2	304	240	98659	0.0386708	0.054115	2.70447	NM_001130861.1;NM_003277.3
GO:0030898	actin-dependent ATPase activity	molecular_function	1	304	101	98659	0.0391373	0.0546825	3.21323	XM_011511213.1
GO:0007200	phospholipase C-activating G-protein coupled receptor signaling pathway	biological_process	2	304	244	98659	0.040288	0.0562028	2.66013	NM_001164692.2;NM_019839.4
GO:0016301	kinase activity	molecular_function	3	304	416	98659	0.0406926	0.056679	2.34041	NM_001122957.2;NM_001271926.1;NM_005881.3
GO:0042474	middle ear morphogenesis	biological_process	1	304	104	98659	0.0412616	0.0572936	3.12054	NM_145260.2
GO:0006892	post-Golgi vesicle-mediated transport	biological_process	1	304	104	98659	0.0412616	0.0572936	3.12054	XM_011511213.1
GO:0070125	mitochondrial translational elongation	biological_process	2	304	253	98659	0.04405	0.0610709	2.5655	NM_003321.4;XM_011545928.1
GO:0035267	NuA4 histone acetyltransferase complex	cellular_component	1	304	108	98659	0.0441599	0.0611287	3.00496	XM_011513250.1
GO:0048863	stem cell differentiation	biological_process	1	304	110	98659	0.0456366	0.0630755	2.95033	NM_145260.2
GO:0045121	membrane raft	cellular_component	7	304	1280	98659	0.0464724	0.0641319	1.77481	XM_011541773.1;XM_011541774.1;XM_011541776.1;XM_011541777.1;XM_011541778.1;XM_011541779.1;XM_011541780.1
GO:0007249	I-kappaB kinase/NF-kappaB signaling	biological_process	2	304	261	98659	0.0475356	0.0654984	2.48687	NM_052813.4;NM_052814.3
GO:0003677	DNA binding	molecular_function	34	304	8489	98659	0.0481547	0.0662496	1.29983	NM_001042476.2;NM_001145412.2;NM_001145413.2;NM_001197297.1;NM_001278260.1;NM_001278261.1;NM_001278262.1;NM_001278263.1;NM_001278264.1;NM_001278265.1;NM_001278266.1;NM_004472.2;NM_005068.2;NM_006339.2;NM_014316.3;NM_015898.2;NM_021020.3;NM_032199.2;XM_005255228.3;XM_005255229.3;XM_005259570.3;XM_005259571.3;XM_005259572.2;XM_005267100.2;XM_005273394.3;XM_011522444.1;XM_011536072.1;XM_011536073.1;…
GO:0045454	cell redox homeostasis	biological_process	2	304	263	98659	0.0484277	0.0665232	2.46796	NM_001145412.2;NM_001145413.2
GO:0000146	microfilament motor activity	molecular_function	1	304	115	98659	0.0494066	0.067764	2.82205	XM_011511213.1
GO:0042110	T cell activation	biological_process	2	304	266	98659	0.0497811	0.0681735	2.44012	NM_000377.2;XM_011543977.1
GO:0045879	negative regulation of smoothened signaling pathway	biological_process	1	304	116	98659	0.0501737	0.068502	2.79773	NM_001083607.1
GO:0034199	activation of protein kinase A activity	biological_process	1	304	116	98659	0.0501737	0.068502	2.79773	NM_001164760.1
GO:0035556	intracellular signal transduction	biological_process	12	304	2524	98659	0.0510629	0.0696101	1.54296	NM_001042476.2;NM_001278260.1;NM_001278261.1;NM_001278262.1;NM_001278263.1;NM_001278264.1;NM_001278265.1;NM_001278266.1;NM_014316.3;XM_005255228.3;XM_005255229.3;XM_011522444.1
GO:0005783	endoplasmic reticulum	cellular_component	18	304	4098	98659	0.0519554	0.0707193	1.42549	NM_001098537.2;NM_001291428.1;NM_001291431.1;NM_012293.2;NM_138761.3;NM_138763.3;NM_138764.4;NM_152286.4;NM_198565.2;XM_005264707.2;XM_006717102.1;XM_006717104.2;XM_006723314.2;XM_011510395.1;XM_011510396.1;XM_011510397.1;XM_011518664.1;XM_011527191.1
GO:0006812	cation transport	biological_process	1	304	121	98659	0.0540732	0.0734904	2.68212	NM_020533.2
GO:0003678	DNA helicase activity	molecular_function	1	304	122	98659	0.0548656	0.0744545	2.66013	XM_011513250.1
GO:0016197	endosomal transport	biological_process	2	304	279	98659	0.0558562	0.0755701	2.32642	NM_000377.2;XM_011543977.1
GO:0050830	defense response to Gram-positive bacterium	biological_process	2	304	279	98659	0.0558562	0.0755701	2.32642	NM_052813.4;NM_052814.3
GO:0000981	RNA polymerase II transcription factor activity, sequence-specific DNA binding	molecular_function	5	304	879	98659	0.056301	0.0760572	1.84605	NM_004472.2;NM_005068.2;XM_005267100.2;XM_011536072.1;XM_011536073.1
GO:0072593	reactive oxygen species metabolic process	biological_process	1	304	124	98659	0.0564627	0.076161	2.61723	NM_178191.2
GO:0005261	cation channel activity	molecular_function	1	304	125	98659	0.0572674	0.0771304	2.59629	NM_020533.2
GO:0030332	cyclin binding	molecular_function	1	304	126	98659	0.058076	0.0781022	2.57568	NM_001083607.1
GO:2000251	positive regulation of actin cytoskeleton reorganization	biological_process	1	304	128	98659	0.0597052	0.0801729	2.53544	NM_018842.4
GO:0007186	G-protein coupled receptor signaling pathway	biological_process	11	304	2341	98659	0.0609888	0.0817743	1.52495	NM_001126044.1;NM_198714.1;NM_198715.2;NM_198716.1;NM_198717.1;NM_198718.1;NM_198719.1;XM_005267891.2;XM_011541809.1;XM_011541810.1;XM_011541811.1
GO:0031011	Ino80 complex	cellular_component	1	304	130	98659	0.0613499	0.0821357	2.49643	XM_011513250.1
GO:0015031	protein transport	biological_process	10	304	2104	98659	0.0635135	0.0849056	1.54247	NM_001130848.1;NM_004886.3;NM_004910.2;NM_024798.2;XM_005253166.1;XM_006718346.1;XM_006722950.2;XM_006722951.2;XM_011545396.1;XM_011545397.1
GO:0006783	heme biosynthetic process	biological_process	1	304	134	98659	0.0646854	0.0863434	2.42191	NM_178191.2
GO:0007009	plasma membrane organization	biological_process	1	304	135	98659	0.0655286	0.087339	2.40397	NM_018842.4
GO:0033572	transferrin transport	biological_process	1	304	138	98659	0.0680803	0.0906054	2.35171	NM_020533.2
GO:0009953	dorsal/ventral pattern formation	biological_process	1	304	139	98659	0.0689381	0.0916111	2.33479	NM_001083607.1
GO:0008544	epidermis development	biological_process	2	304	306	98659	0.0695335	0.0922657	2.12115	NM_000377.2;XM_011543977.1
GO:0031225	anchored component of membrane	cellular_component	3	304	499	98659	0.06967	0.0923102	1.95112	NM_021948.4;NM_198427.1;XM_011509866.1
GO:0035116	embryonic hindlimb morphogenesis	biological_process	1	304	141	98659	0.0706644	0.093352	2.30168	NM_145260.2
GO:0042476	odontogenesis	biological_process	1	304	141	98659	0.0706644	0.093352	2.30168	NM_145260.2
GO:0050790	regulation of catalytic activity	biological_process	2	304	311	98659	0.0722179	0.0952639	2.08705	NM_000377.2;XM_011543977.1
GO:0034080	CENP-A containing nucleosome assembly	biological_process	1	304	143	98659	0.0724047	0.0953701	2.26948	XM_011513250.1
GO:0032452	histone demethylase activity	molecular_function	2	304	314	98659	0.0738506	0.0971319	2.06711	NM_032199.2;XM_011540262.1
GO:0035904	aorta development	biological_process	1	304	145	98659	0.0741589	0.0973946	2.23818	XM_005268435.3
GO:0042742	defense response to bacterium	biological_process	2	304	318	98659	0.0760529	0.099736	2.04111	NM_020070.3;XM_011530169.1
GO:0035690	cellular response to drug	biological_process	2	304	321	98659	0.0777235	0.101778	2.02203	NM_001145412.2;NM_001145413.2
GO:0007612	learning	biological_process	2	304	323	98659	0.0788462	0.103098	2.00951	NM_001130861.1;NM_003277.3
GO:0030501	positive regulation of bone mineralization	biological_process	1	304	151	98659	0.0795016	0.103803	2.14925	NM_145260.2
GO:0001227	transcriptional repressor activity, RNA polymerase II transcription regulatory region sequence-specific binding	molecular_function	2	304	325	98659	0.0799759	0.104271	1.99715	NM_032199.2;XM_011540262.1
GO:0007218	neuropeptide signaling pathway	biological_process	2	304	329	98659	0.0822565	0.107089	1.97286	NM_001164692.2;NM_019839.4
GO:0034599	cellular response to oxidative stress	biological_process	2	304	330	98659	0.082831	0.107525	1.96689	NM_001145412.2;NM_001145413.2
GO:0070301	cellular response to hydrogen peroxide	biological_process	2	304	330	98659	0.082831	0.107525	1.96689	NM_001145412.2;NM_001145413.2
GO:0071944	cell periphery	cellular_component	1	304	158	98659	0.0858809	0.111322	2.05403	XM_011511213.1
GO:0006952	defense response	biological_process	2	304	342	98659	0.0898588	0.116311	1.89787	NM_000377.2;XM_011543977.1
GO:0031572	G2 DNA damage checkpoint	biological_process	1	304	163	98659	0.0905287	0.117009	1.99102	NM_001243079.1
GO:0034220	ion transmembrane transport	biological_process	6	304	1239	98659	0.0909386	0.11737	1.5716	NM_000830.3;NM_175611.2;XM_005260942.1;XM_005260943.1;XM_005260944.2;XM_006723991.1
GO:1903146	regulation of mitophagy	biological_process	1	304	167	98659	0.0942991	0.121532	1.94333	XM_011513250.1
GO:0009791	post-embryonic development	biological_process	2	304	353	98659	0.0965121	0.124206	1.83873	NM_032199.2;XM_011540262.1
GO:0008283	cell proliferation	biological_process	9	304	2019	98659	0.0974647	0.125251	1.44667	NM_001161441.1;NM_001161442.1;NM_001161443.1;NM_001161444.1;NM_003975.3;XM_006711615.1;XM_011510113.1;XM_011510114.1;XM_011510115.1
GO:0030165	PDZ domain binding	molecular_function	3	304	563	98659	0.0976037	0.125251	1.72932	NM_001080414.3;XM_005267691.3;XM_011536796.1
GO:0003676	nucleic acid binding	molecular_function	4	304	787	98659	0.0979135	0.125469	1.64949	NM_017560.1;NM_145260.2;XM_011515438.1;XM_011515439.1
GO:0071377	cellular response to glucagon stimulus	biological_process	1	304	172	98659	0.0990746	0.126776	1.88684	NM_001164760.1
GO:0046330	positive regulation of JNK cascade	biological_process	2	304	358	98659	0.099601	0.127268	1.81305	NM_052813.4;NM_052814.3
GO:0035115	embryonic forelimb morphogenesis	biological_process	1	304	173	98659	0.100038	0.127644	1.87593	NM_145260.2
GO:0048469	cell maturation	biological_process	1	304	175	98659	0.101972	0.129927	1.85449	XM_011518522.1
GO:0045444	fat cell differentiation	biological_process	2	304	363	98659	0.102729	0.130707	1.78808	NM_032199.2;XM_011540262.1
GO:0006890	retrograde vesicle-mediated transport, Golgi to ER	biological_process	2	304	365	98659	0.103992	0.132125	1.77828	XM_005253166.1;XM_006718346.1
GO:0001501	skeletal system development	biological_process	3	304	579	98659	0.105295	0.133593	1.68153	NM_021948.4;NM_198427.1;XM_011509866.1
GO:0016236	macroautophagy	biological_process	2	304	374	98659	0.109747	0.138732	1.73549	NM_001134484.1;NM_001134485.1
GO:0003091	renal water homeostasis	biological_process	1	304	183	98659	0.10981	0.138732	1.77342	NM_001164760.1
GO:0016459	myosin complex	cellular_component	1	304	183	98659	0.10981	0.138732	1.77342	XM_011511213.1
GO:0030552	cAMP binding	molecular_function	1	304	184	98659	0.110801	0.139786	1.76378	NM_001164760.1
GO:0010468	regulation of gene expression	biological_process	3	304	593	98659	0.112245	0.141335	1.64184	NM_004886.3;XM_006722950.2;XM_006722951.2
GO:0072562	blood microparticle	cellular_component	2	304	378	98659	0.112343	0.141335	1.71712	NM_020070.3;XM_011530169.1
GO:0045668	negative regulation of osteoblast differentiation	biological_process	1	304	186	98659	0.112789	0.141697	1.74482	NM_001083607.1
GO:0001937	negative regulation of endothelial cell proliferation	biological_process	1	304	188	98659	0.114787	0.144005	1.72626	NM_178191.2
GO:0005765	lysosomal membrane	cellular_component	6	304	1317	98659	0.11509	0.144184	1.47852	NM_001098537.2;NM_020533.2;NM_152286.4;XM_006717102.1;XM_006717104.2;XM_011518664.1
GO:0008589	regulation of smoothened signaling pathway	biological_process	1	304	190	98659	0.116794	0.146114	1.70809	NM_001083607.1
GO:0060976	coronary vasculature development	biological_process	1	304	191	98659	0.1178	0.147168	1.69914	XM_005268435.3
GO:0009986	cell surface	cellular_component	11	304	2641	98659	0.118833	0.148252	1.35172	NM_001126044.1;NM_178191.2;NM_198714.1;NM_198715.2;NM_198716.1;NM_198717.1;NM_198718.1;NM_198719.1;XM_011541809.1;XM_011541810.1;XM_011541811.1
GO:0038096	Fc-gamma receptor signaling pathway involved in phagocytosis	biological_process	2	304	389	98659	0.119604	0.149006	1.66857	NM_000377.2;XM_011543977.1
GO:0001701	in utero embryonic development	biological_process	5	304	1083	98659	0.120181	0.149517	1.49832	NM_001083607.1;NM_001197297.1;NM_004886.3;XM_006722950.2;XM_006722951.2
GO:0051209	release of sequestered calcium ion into cytosol	biological_process	1	304	194	98659	0.120834	0.150122	1.67287	NM_020533.2
GO:0006024	glycosaminoglycan biosynthetic process	biological_process	1	304	195	98659	0.121849	0.151174	1.66429	XM_005268435.3
GO:0030901	midbrain development	biological_process	1	304	197	98659	0.123886	0.153489	1.64739	XM_005268435.3
GO:0007585	respiratory gaseous exchange	biological_process	1	304	198	98659	0.124908	0.154541	1.63907	XM_005268435.3
GO:0006935	chemotaxis	biological_process	2	304	398	98659	0.125669	0.155269	1.63084	NM_001164692.2;NM_019839.4
GO:0007611	learning or memory	biological_process	1	304	199	98659	0.125931	0.155379	1.63084	NM_001164760.1
GO:0035914	skeletal muscle cell differentiation	biological_process	1	304	201	98659	0.127985	0.157695	1.61461	NM_006339.2
GO:0008565	protein transporter activity	molecular_function	2	304	404	98659	0.129774	0.159681	1.60661	NM_001134484.1;NM_001134485.1
GO:0010976	positive regulation of neuron projection development	biological_process	3	304	628	98659	0.130471	0.160319	1.55033	NM_001243079.1;XM_006718211.1;XM_006718213.1
GO:0097546	ciliary base	cellular_component	1	304	205	98659	0.132115	0.161895	1.5831	NM_001164760.1
GO:0071363	cellular response to growth factor stimulus	biological_process	1	304	205	98659	0.132115	0.161895	1.5831	NM_001243079.1
GO:0006302	double-strand break repair	biological_process	2	304	414	98659	0.136718	0.167307	1.56781	XM_006718211.1;XM_006718213.1
GO:0016310	phosphorylation	biological_process	3	304	640	98659	0.136987	0.167408	1.52126	NM_001122957.2;NM_001271926.1;NM_005881.3
GO:0007346	regulation of mitotic cell cycle	biological_process	1	304	212	98659	0.139414	0.170142	1.53083	NM_001083607.1
GO:0000785	chromatin	cellular_component	2	304	419	98659	0.140238	0.170914	1.5491	NM_001145412.2;NM_001145413.2
GO:0006915	apoptotic process	biological_process	11	304	2738	98659	0.142618	0.17358	1.30383	NM_001291428.1;NM_001291431.1;NM_138761.3;NM_138763.3;NM_138764.4;XM_006718211.1;XM_006718213.1;XM_006723314.2;XM_011527191.1;XM_011531513.1;XM_011531514.1
GO:0006091	generation of precursor metabolites and energy	biological_process	1	304	219	98659	0.146799	0.178426	1.4819	NM_178191.2
GO:0005057	receptor signaling protein activity	molecular_function	1	304	220	98659	0.14786	0.179473	1.47516	NM_001144772.1
GO:0030838	positive regulation of actin filament polymerization	biological_process	1	304	222	98659	0.149988	0.18181	1.46187	NM_018842.4
GO:0071339	MLL1 complex	cellular_component	1	304	223	98659	0.151054	0.18278	1.45532	XM_011513250.1
GO:0006810	transport	biological_process	6	304	1419	98659	0.151196	0.18278	1.37225	NM_000830.3;NM_175611.2;XM_005260942.1;XM_005260943.1;XM_005260944.2;XM_006723991.1
GO:0005102	receptor binding	molecular_function	7	304	1694	98659	0.15524	0.187286	1.34106	NM_000203.4;XM_006713882.2;XM_011513459.1;XM_011513460.1;XM_011513461.1;XM_011513462.1;XM_011513463.1
GO:0001889	liver development	biological_process	2	304	440	98659	0.155341	0.187286	1.47516	NM_032199.2;XM_011540262.1
GO:0003007	heart morphogenesis	biological_process	1	304	229	98659	0.157482	0.189426	1.41719	NM_001083607.1
GO:0071356	cellular response to tumor necrosis factor	biological_process	2	304	443	98659	0.157539	0.189426	1.46517	NM_001145412.2;NM_001145413.2
GO:0008584	male gonad development	biological_process	2	304	444	98659	0.158273	0.190055	1.46187	NM_032199.2;XM_011540262.1
GO:0001658	branching involved in ureteric bud morphogenesis	biological_process	1	304	233	98659	0.161796	0.193766	1.39286	NM_001083607.1
GO:0015485	cholesterol binding	molecular_function	1	304	233	98659	0.161796	0.193766	1.39286	NM_001083607.1
GO:0030326	embryonic limb morphogenesis	biological_process	1	304	235	98659	0.163961	0.196097	1.38101	NM_001083607.1
GO:0032526	response to retinoic acid	biological_process	1	304	236	98659	0.165045	0.197131	1.37515	NM_001083607.1
GO:0008093	cytoskeletal adaptor activity	molecular_function	1	304	237	98659	0.166131	0.198164	1.36935	NM_018842.4
GO:0002062	chondrocyte differentiation	biological_process	1	304	239	98659	0.168306	0.200492	1.35789	NM_145260.2
GO:0072661	protein targeting to plasma membrane	biological_process	1	304	243	98659	0.17267	0.205418	1.33554	NM_001083607.1
GO:0008380	RNA splicing	biological_process	4	304	954	98659	0.173565	0.206209	1.36074	NM_001278439.1;NM_007056.2;XM_011526396.1;XM_011526397.1
GO:0051897	positive regulation of protein kinase B signaling	biological_process	2	304	465	98659	0.173941	0.206382	1.39585	NM_020702.4;XM_011517966.1
GO:0002223	stimulatory C-type lectin receptor signaling pathway	biological_process	2	304	470	98659	0.177734	0.210605	1.38101	NM_052813.4;NM_052814.3
GO:0030900	forebrain development	biological_process	1	304	254	98659	0.184765	0.218646	1.2777	XM_005268435.3
GO:0005547	phosphatidylinositol-3,4,5-trisphosphate binding	molecular_function	1	304	255	98659	0.18587	0.219665	1.27269	XM_011511213.1
GO:0007224	smoothened signaling pathway	biological_process	2	304	485	98659	0.189248	0.223362	1.33829	NM_001083607.1;XM_005268435.3
GO:0030218	erythrocyte differentiation	biological_process	1	304	260	98659	0.191412	0.22562	1.24822	NM_178191.2
GO:0051289	protein homotetramerization	biological_process	1	304	263	98659	0.194747	0.22925	1.23398	NM_178191.2
GO:0016032	viral process	biological_process	7	304	1807	98659	0.197023	0.231625	1.2572	NM_001291428.1;NM_001291431.1;NM_138761.3;NM_138763.3;NM_138764.4;XM_006723314.2;XM_011527191.1
GO:0032508	DNA duplex unwinding	biological_process	1	304	269	98659	0.20144	0.236271	1.20645	XM_011513250.1
GO:0001934	positive regulation of protein phosphorylation	biological_process	3	304	749	98659	0.201502	0.236271	1.29988	NM_052966.3;XM_011509140.1;XM_011509141.1
GO:0032880	regulation of protein localization	biological_process	1	304	273	98659	0.205917	0.241133	1.18878	NM_001083607.1
GO:0004693	cyclin-dependent protein serine/threonine kinase activity	molecular_function	1	304	276	98659	0.209281	0.244753	1.17586	XM_011523413.1
GO:0035264	multicellular organism growth	biological_process	2	304	511	98659	0.209631	0.244843	1.2702	NM_032199.2;XM_011540262.1
GO:0030425	dendrite	cellular_component	7	304	1841	98659	0.210429	0.245455	1.23398	NM_021948.4;NM_053052.3;NM_198427.1;XM_005273041.3;XM_005273044.2;XM_006711734.2;XM_011509866.1
GO:0005903	brush border	cellular_component	1	304	278	98659	0.211528	0.246416	1.1674	XM_011511213.1
GO:0050679	positive regulation of epithelial cell proliferation	biological_process	1	304	280	98659	0.213776	0.248647	1.15906	NM_145260.2
GO:0007420	brain development	biological_process	5	304	1299	98659	0.213997	0.248647	1.24918	NM_001083607.1;NM_001130848.1;NM_004910.2;XM_011545396.1;XM_011545397.1
GO:0040008	regulation of growth	biological_process	1	304	284	98659	0.21828	0.253295	1.14273	XM_011513250.1
GO:0042734	presynaptic membrane	cellular_component	2	304	529	98659	0.224016	0.259615	1.22698	XM_006718211.1;XM_006718213.1
GO:0009612	response to mechanical stimulus	biological_process	1	304	293	98659	0.228442	0.264062	1.10763	NM_001083607.1
GO:0071300	cellular response to retinoic acid	biological_process	1	304	293	98659	0.228442	0.264062	1.10763	NM_145260.2
GO:1904837	beta-catenin-TCF complex assembly	biological_process	1	304	294	98659	0.229573	0.265029	1.10386	XM_011513250.1
GO:0005884	actin filament	cellular_component	1	304	301	98659	0.237502	0.273829	1.07819	XM_011511213.1
GO:0006397	mRNA processing	biological_process	4	304	1083	98659	0.243324	0.280003	1.19866	NM_001278439.1;NM_007056.2;XM_011526396.1;XM_011526397.1
GO:0005975	carbohydrate metabolic process	biological_process	2	304	553	98659	0.243481	0.280003	1.17373	NM_020702.4;XM_011517966.1
GO:0060170	ciliary membrane	cellular_component	1	304	309	98659	0.24658	0.283204	1.05028	NM_001083607.1
GO:0004407	histone deacetylase activity	molecular_function	1	304	312	98659	0.249987	0.28675	1.04018	NM_006339.2
GO:0005739	mitochondrion	cellular_component	21	304	6096	98659	0.251989	0.288678	1.11799	NM_001122957.2;NM_001134484.1;NM_001134485.1;NM_001242902.1;NM_001242903.1;NM_001271926.1;NM_001291428.1;NM_001291431.1;NM_003321.4;NM_003488.3;NM_005881.3;NM_138761.3;NM_138763.3;NM_138764.4;NM_178191.2;XM_005257707.1;XM_005257709.1;XM_006723314.2;XM_011525318.1;XM_011527191.1;XM_011545928.1
GO:0030246	carbohydrate binding	molecular_function	3	304	835	98659	0.257573	0.294698	1.166	NM_021948.4;NM_198427.1;XM_011509866.1
GO:0005901	caveola	cellular_component	1	304	320	98659	0.25908	0.296045	1.01418	NM_001083607.1
GO:0042733	embryonic digit morphogenesis	biological_process	1	304	325	98659	0.264766	0.302157	0.998573	NM_145260.2
GO:0051091	positive regulation of sequence-specific DNA binding transcription factor activity	biological_process	2	304	583	98659	0.268168	0.30565	1.11333	NM_032199.2;XM_011540262.1
GO:0043066	negative regulation of apoptotic process	biological_process	8	304	2292	98659	0.277417	0.315791	1.13276	NM_145260.2;XM_011541773.1;XM_011541774.1;XM_011541776.1;XM_011541777.1;XM_011541778.1;XM_011541779.1;XM_011541780.1
GO:0007409	axonogenesis	biological_process	2	304	598	98659	0.280621	0.319033	1.08541	XM_006718211.1;XM_006718213.1
GO:0005546	phosphatidylinositol-4,5-bisphosphate binding	molecular_function	1	304	341	98659	0.282954	0.321279	0.951719	XM_011511213.1
GO:0044212	transcription regulatory region DNA binding	molecular_function	5	304	1440	98659	0.285504	0.323764	1.12686	NM_001145412.2;NM_001145413.2;NM_001197297.1;NM_032199.2;XM_011540262.1
GO:0016485	protein processing	biological_process	1	304	348	98659	0.290902	0.329468	0.932575	NM_001083607.1
GO:0042393	histone binding	molecular_function	2	304	612	98659	0.292291	0.330625	1.06058	XM_006718211.1;XM_006718213.1
GO:0050680	negative regulation of epithelial cell proliferation	biological_process	1	304	357	98659	0.301103	0.340163	0.909065	NM_001083607.1
GO:0007005	mitochondrion organization	biological_process	1	304	358	98659	0.302235	0.341012	0.906526	NM_001197297.1
GO:0016575	histone deacetylation	biological_process	1	304	359	98659	0.303366	0.341859	0.904001	NM_006339.2
GO:0005615	extracellular space	cellular_component	17	304	5121	98659	0.316976	0.356747	1.07735	NM_001135914.1;NM_012293.2;NM_021948.4;NM_153270.2;NM_198427.1;NM_198455.2;XM_005264707.2;XM_011509866.1;XM_011510395.1;XM_011510396.1;XM_011510397.1;XM_011516171.1;XM_011516172.1;XM_011516173.1;XM_011516174.1;XM_011516175.1;XM_011516176.1
GO:0043085	positive regulation of catalytic activity	biological_process	1	304	378	98659	0.324798	0.365092	0.858561	NM_001144772.1
GO:0007015	actin filament organization	biological_process	1	304	379	98659	0.325921	0.365896	0.856296	XM_011511213.1
GO:0051965	positive regulation of synapse assembly	biological_process	1	304	385	98659	0.332652	0.372986	0.842951	NM_001024678.3
GO:0030308	negative regulation of cell growth	biological_process	2	304	669	98659	0.340017	0.380768	0.970213	XM_006718211.1;XM_006718213.1
GO:0003700	transcription factor activity, sequence-specific DNA binding	molecular_function	18	304	5517	98659	0.342177	0.382709	1.05885	NM_001145412.2;NM_001145413.2;NM_001186.3;NM_001197297.1;NM_004472.2;NM_005068.2;NM_021020.3;NM_206866.2;XM_005267100.2;XM_005273394.3;XM_011518522.1;XM_011536072.1;XM_011536073.1;XM_011544383.1;XM_011544384.1;XM_011544385.1;XM_011544386.1;XM_011544387.1
GO:0043433	negative regulation of sequence-specific DNA binding transcription factor activity	biological_process	1	304	396	98659	0.344942	0.385321	0.819536	NM_001083607.1
GO:0042802	identical protein binding	molecular_function	11	304	3375	98659	0.348076	0.388338	1.05775	NM_000377.2;NM_001130861.1;NM_001291428.1;NM_001291431.1;NM_003277.3;NM_138761.3;NM_138763.3;NM_138764.4;XM_006723314.2;XM_011527191.1;XM_011543977.1
GO:0051607	defense response to virus	biological_process	2	304	699	98659	0.365093	0.406818	0.928573	NM_052813.4;NM_052814.3
GO:0008543	fibroblast growth factor receptor signaling pathway	biological_process	1	304	417	98659	0.36819	0.409515	0.778264	XM_005268435.3
GO:0006461	protein complex assembly	biological_process	2	304	703	98659	0.368426	0.409515	0.923289	NM_000377.2;XM_011543977.1
GO:0016021	integral component of membrane	cellular_component	55	304	17335	98659	0.370978	0.411841	1.02968	NM_001024678.3;NM_001083607.1;NM_001098537.2;NM_001126044.1;NM_001130861.1;NM_001134484.1;NM_001134485.1;NM_001146336.1;NM_001242902.1;NM_001242903.1;NM_001267812.1;NM_001267814.1;NM_001290095.1;NM_001290097.1;NM_003277.3;NM_003488.3;NM_020246.3;NM_020533.2;NM_020698.3;NM_020702.4;NM_138477.2;NM_152286.4;NM_198149.2;NM_198565.2;NM_198714.1;NM_198715.2;NM_198716.1;NM_198717.1;NM_198718.1;NM_198719…
GO:0001228	transcriptional activator activity, RNA polymerase II transcription regulatory region sequence-specific binding	molecular_function	1	304	420	98659	0.371486	0.411895	0.772705	NM_001197297.1
GO:0006351	transcription, DNA-templated	biological_process	35	304	11051	98659	0.38764	0.429276	1.02785	NM_001126044.1;NM_005068.2;NM_006339.2;NM_015898.2;NM_021020.3;NM_032199.2;NM_145260.2;NM_198714.1;NM_198715.2;NM_198716.1;NM_198717.1;NM_198718.1;NM_198719.1;XM_005259570.3;XM_005259571.3;XM_005259572.2;XM_005267100.2;XM_005273394.3;XM_006718211.1;XM_006718213.1;XM_011513250.1;XM_011518522.1;XM_011531513.1;XM_011531514.1;XM_011536072.1;XM_011536073.1;XM_011540262.1;XM_011541809.1;XM_011541810.1;…
GO:0035091	phosphatidylinositol binding	molecular_function	1	304	437	98659	0.390027	0.431387	0.742646	NM_024798.2
GO:0016055	Wnt signaling pathway	biological_process	3	304	1028	98659	0.390509	0.431387	0.94709	NM_001080414.3;XM_005267691.3;XM_011536796.1
GO:0030666	endocytic vesicle membrane	cellular_component	1	304	438	98659	0.391111	0.431521	0.74095	NM_001083607.1
GO:0030175	filopodium	cellular_component	1	304	440	98659	0.393275	0.433375	0.737582	XM_011511213.1
GO:0006310	DNA recombination	biological_process	1	304	444	98659	0.397592	0.437595	0.730937	XM_011513250.1
GO:0006355	regulation of transcription, DNA-templated	biological_process	25	304	7927	98659	0.399433	0.439083	1.02352	NM_001042476.2;NM_001186.3;NM_001278260.1;NM_001278261.1;NM_001278262.1;NM_001278263.1;NM_001278264.1;NM_001278265.1;NM_001278266.1;NM_006339.2;NM_014316.3;NM_021020.3;NM_206866.2;XM_005255228.3;XM_005255229.3;XM_005273394.3;XM_006718211.1;XM_006718213.1;XM_011518522.1;XM_011522444.1;XM_011544383.1;XM_011544384.1;XM_011544385.1;XM_011544386.1;XM_011544387.1
GO:0005262	calcium channel activity	molecular_function	1	304	450	98659	0.404041	0.443605	0.721192	NM_020533.2
GO:0031902	late endosome membrane	cellular_component	1	304	451	98659	0.405113	0.443695	0.719592	NM_020533.2
GO:0051117	ATPase binding	molecular_function	1	304	451	98659	0.405113	0.443695	0.719592	NM_178191.2
GO:0043410	positive regulation of MAPK cascade	biological_process	1	304	455	98659	0.40939	0.447833	0.713266	XM_011523413.1
GO:0000978	RNA polymerase II core promoter proximal region sequence-specific DNA binding	molecular_function	6	304	1985	98659	0.4126	0.450794	0.980966	NM_001197297.1;NM_004472.2;NM_015898.2;XM_005259570.3;XM_005259571.3;XM_005259572.2
GO:0007165	signal transduction	biological_process	19	304	6086	98659	0.416087	0.454051	1.01318	NM_001144772.1;NM_001161441.1;NM_001161442.1;NM_001161443.1;NM_001161444.1;NM_003975.3;XM_006711615.1;XM_006718211.1;XM_006718213.1;XM_011510113.1;XM_011510114.1;XM_011510115.1;XM_011541773.1;XM_011541774.1;XM_011541776.1;XM_011541777.1;XM_011541778.1;XM_011541779.1;XM_011541780.1
GO:0050852	T cell receptor signaling pathway	biological_process	2	304	771	98659	0.424465	0.462631	0.841858	NM_000377.2;XM_011543977.1
GO:0001843	neural tube closure	biological_process	1	304	471	98659	0.426347	0.464118	0.689036	NM_001083607.1
GO:0008284	positive regulation of cell proliferation	biological_process	7	304	2334	98659	0.430216	0.467762	0.97333	XM_011541773.1;XM_011541774.1;XM_011541776.1;XM_011541777.1;XM_011541778.1;XM_011541779.1;XM_011541780.1
GO:0032588	trans-Golgi network membrane	cellular_component	1	304	483	98659	0.438897	0.476623	0.671918	XM_011511213.1
GO:0005543	phospholipid binding	molecular_function	1	304	492	98659	0.448211	0.486149	0.659626	NM_001144772.1
GO:0045666	positive regulation of neuron differentiation	biological_process	1	304	502	98659	0.458457	0.496662	0.646486	NM_006339.2
GO:0042593	glucose homeostasis	biological_process	1	304	504	98659	0.460493	0.498266	0.643921	NM_001083607.1
GO:0006888	ER to Golgi vesicle-mediated transport	biological_process	2	304	824	98659	0.466938	0.50463	0.787709	XM_005253166.1;XM_006718346.1
GO:1903955	positive regulation of protein targeting to mitochondrion	biological_process	1	304	511	98659	0.467584	0.504721	0.6351	XM_011513250.1
GO:0030426	growth cone	cellular_component	2	304	832	98659	0.473231	0.510202	0.780135	XM_006718211.1;XM_006718213.1
GO:0009887	organ morphogenesis	biological_process	1	304	518	98659	0.474619	0.511085	0.626518	NM_001083607.1
GO:0009897	external side of plasma membrane	cellular_component	2	304	854	98659	0.490361	0.527402	0.760038	NM_020070.3;XM_011530169.1
GO:0007050	cell cycle arrest	biological_process	2	304	863	98659	0.49729	0.534214	0.752112	XM_006718211.1;XM_006718213.1
GO:0072372	primary cilium	cellular_component	1	304	558	98659	0.513717	0.551201	0.581606	NM_001083607.1
GO:0003924	GTPase activity	molecular_function	2	304	901	98659	0.526011	0.563718	0.720391	NM_003321.4;XM_011545928.1
GO:0005198	structural molecule activity	molecular_function	2	304	918	98659	0.538564	0.576482	0.707051	NM_001130861.1;NM_003277.3
GO:0016567	protein ubiquitination	biological_process	5	304	1925	98659	0.544986	0.58266	0.842951	NM_001145412.2;NM_001145413.2;NM_001186.3;NM_153270.2;NM_206866.2
GO:0005856	cytoskeleton	cellular_component	7	304	2604	98659	0.552477	0.589966	0.872409	NM_018424.3;NM_019114.4;XM_011518790.1;XM_011518791.1;XM_011518792.1;XM_011518793.1;XM_011518794.1
GO:0043123	positive regulation of I-kappaB kinase/NF-kappaB signaling	biological_process	2	304	952	98659	0.563093	0.600588	0.681799	NM_052813.4;NM_052814.3
GO:0005887	integral component of plasma membrane	cellular_component	19	304	6613	98659	0.567227	0.604278	0.932434	NM_000830.3;NM_001126044.1;NM_001164692.2;NM_019839.4;NM_020533.2;NM_175611.2;NM_198714.1;NM_198715.2;NM_198716.1;NM_198717.1;NM_198718.1;NM_198719.1;XM_005260942.1;XM_005260943.1;XM_005260944.2;XM_006723991.1;XM_011541809.1;XM_011541810.1;XM_011541811.1
GO:0043161	proteasome-mediated ubiquitin-dependent protein catabolic process	biological_process	2	304	967	98659	0.57366	0.610407	0.671223	NM_001145412.2;NM_001145413.2
GO:0006281	DNA repair	biological_process	3	304	1311	98659	0.575884	0.612047	0.742646	NM_001186.3;NM_206866.2;XM_011513250.1
GO:0045087	innate immune response	biological_process	5	304	1995	98659	0.579781	0.615068	0.813374	NM_020070.3;NM_052813.4;NM_052814.3;NM_198565.2;XM_011530169.1
GO:0005789	endoplasmic reticulum membrane	cellular_component	12	304	4338	98659	0.580098	0.615068	0.897749	NM_001130848.1;NM_001291428.1;NM_001291431.1;NM_004910.2;NM_138761.3;NM_138763.3;NM_138764.4;NM_198565.2;XM_006723314.2;XM_011527191.1;XM_011545396.1;XM_011545397.1
GO:0010008	endosome membrane	cellular_component	2	304	1022	98659	0.611022	0.647092	0.6351	NM_020533.2;XM_011511213.1
GO:0030659	cytoplasmic vesicle membrane	cellular_component	1	304	679	98659	0.619787	0.6556	0.477962	NM_024798.2
GO:0045892	negative regulation of transcription, DNA-templated	biological_process	7	304	2784	98659	0.627676	0.663163	0.816003	NM_004472.2;NM_015898.2;NM_032199.2;XM_005259570.3;XM_005259571.3;XM_005259572.2;XM_011540262.1
GO:0005694	chromosome	cellular_component	1	304	722	98659	0.652948	0.689052	0.449496	NM_006339.2
GO:0000977	RNA polymerase II regulatory region sequence-specific DNA binding	molecular_function	2	304	1113	98659	0.667882	0.703984	0.583174	NM_032199.2;XM_011540262.1
GO:0006357	regulation of transcription from RNA polymerase II promoter	biological_process	5	304	2204	98659	0.67495	0.709911	0.736244	NM_005068.2;XM_005267100.2;XM_011513250.1;XM_011536072.1;XM_011536073.1
GO:0006366	transcription from RNA polymerase II promoter	biological_process	6	304	2557	98659	0.675088	0.709911	0.761524	NM_001145412.2;NM_001145413.2;NM_001186.3;NM_001197297.1;NM_004472.2;NM_206866.2
GO:0000122	negative regulation of transcription from RNA polymerase II promoter	biological_process	11	304	4321	98659	0.683304	0.717709	0.826174	NM_001083607.1;NM_001186.3;NM_001197297.1;NM_015898.2;NM_032199.2;NM_145260.2;NM_206866.2;XM_005259570.3;XM_005259571.3;XM_005259572.2;XM_011540262.1
GO:0003723	RNA binding	molecular_function	6	304	2582	98659	0.684796	0.718435	0.754151	NM_001242902.1;NM_001242903.1;NM_003488.3;XM_005257707.1;XM_005257709.1;XM_011525318.1
GO:0043235	receptor complex	cellular_component	1	304	786	98659	0.697993	0.731425	0.412896	NM_020533.2
GO:0042803	protein homodimerization activity	molecular_function	10	304	4050	98659	0.706315	0.739282	0.801324	NM_001291428.1;NM_001291431.1;NM_052813.4;NM_052814.3;NM_138761.3;NM_138763.3;NM_138764.4;NM_178191.2;XM_006723314.2;XM_011527191.1
GO:0070588	calcium ion transmembrane transport	biological_process	1	304	802	98659	0.708471	0.740674	0.404659	NM_020533.2
GO:0003713	transcription coactivator activity	molecular_function	3	304	1575	98659	0.716382	0.748073	0.618164	NM_001197297.1;NM_032199.2;XM_011540262.1
GO:0016607	nuclear speck	cellular_component	2	304	1223	98659	0.728223	0.759554	0.530721	XM_006718211.1;XM_006718213.1
GO:0001077	transcriptional activator activity, RNA polymerase II core promoter proximal region sequence-specific binding	molecular_function	2	304	1225	98659	0.729236	0.759727	0.529855	NM_001197297.1;NM_004472.2
GO:0030027	lamellipodium	cellular_component	2	304	1231	98659	0.732258	0.76199	0.527272	XM_006718211.1;XM_006718213.1
GO:0015629	actin cytoskeleton	cellular_component	3	304	1638	98659	0.74433	0.773655	0.594389	NM_000377.2;NM_018842.4;XM_011543977.1
GO:0008201	heparin binding	molecular_function	1	304	866	98659	0.747388	0.775934	0.374753	NM_001083607.1
GO:0016887	ATPase activity	molecular_function	1	304	887	98659	0.759152	0.787236	0.365881	XM_011513250.1
GO:0006974	cellular response to DNA damage stimulus	biological_process	2	304	1314	98659	0.77138	0.798993	0.493967	XM_006718211.1;XM_006718213.1
GO:0007411	axon guidance	biological_process	1	304	913	98659	0.77306	0.799103	0.355461	NM_004472.2
GO:0019899	enzyme binding	molecular_function	3	304	1709	98659	0.773268	0.799103	0.569695	NM_004886.3;XM_006722950.2;XM_006722951.2
GO:0004842	ubiquitin-protein transferase activity	molecular_function	3	304	1796	98659	0.805156	0.831099	0.542098	NM_001186.3;NM_153270.2;NM_206866.2
GO:0007067	mitotic nuclear division	biological_process	2	304	1405	98659	0.808787	0.833887	0.461973	NM_001243079.1;XM_011513250.1
GO:0007507	heart development	biological_process	1	304	1033	98659	0.828524	0.853256	0.314169	NM_145260.2
GO:0007155	cell adhesion	biological_process	4	304	2397	98659	0.862979	0.88772	0.541571	NM_021948.4;NM_198427.1;NM_198455.2;XM_011509866.1
GO:0005525	GTP binding	molecular_function	2	304	1586	98659	0.867997	0.89186	0.409251	NM_003321.4;XM_011545928.1
GO:0007049	cell cycle	biological_process	1	304	1219	98659	0.890699	0.913369	0.266231	NM_006339.2
GO:0000790	nuclear chromatin	cellular_component	1	304	1220	98659	0.890968	0.913369	0.266013	NM_001197297.1
GO:0055114	oxidation-reduction process	biological_process	5	304	2956	98659	0.894681	0.916128	0.548945	NM_012293.2;XM_005264707.2;XM_011510395.1;XM_011510396.1;XM_011510397.1
GO:0005769	early endosome	cellular_component	1	304	1238	98659	0.895711	0.916138	0.262146	XM_011511213.1
GO:0003682	chromatin binding	molecular_function	3	304	2190	98659	0.906972	0.926599	0.44457	NM_001197297.1;XM_006718211.1;XM_006718213.1
GO:0008134	transcription factor binding	molecular_function	2	304	1780	98659	0.912975	0.93167	0.364647	XM_006718211.1;XM_006718213.1
GO:0045944	positive regulation of transcription from RNA polymerase II promoter	biological_process	11	304	5473	98659	0.916836	0.934548	0.652274	NM_001145412.2;NM_001145413.2;NM_001186.3;NM_001197297.1;NM_004472.2;NM_145260.2;NM_206866.2;XM_006718211.1;XM_006718213.1;XM_011531513.1;XM_011531514.1
GO:0003779	actin binding	molecular_function	3	304	2320	98659	0.928302	0.945161	0.419659	NM_000377.2;NM_018842.4;XM_011543977.1
GO:0000165	MAPK cascade	biological_process	1	304	1443	98659	0.937749	0.953697	0.224904	XM_005268435.3
GO:0043565	sequence-specific DNA binding	molecular_function	2	304	2099	98659	0.957686	0.97287	0.309229	NM_004472.2;XM_011518522.1
GO:0005096	GTPase activator activity	molecular_function	2	304	2128	98659	0.960447	0.974571	0.305015	XM_005253166.1;XM_006718346.1
GO:0043234	protein complex	cellular_component	2	304	2172	98659	0.964316	0.977392	0.298836	XM_006718211.1;XM_006718213.1
GO:0045893	positive regulation of transcription, DNA-templated	biological_process	3	304	3061	98659	0.985604	0.997841	0.318069	NM_001083607.1;XM_006718211.1;XM_006718213.1
GO:0000139	Golgi membrane	cellular_component	3	304	3250	98659	0.990697	1	0.299572	XM_005253166.1;XM_005268435.3;XM_006718346.1
GO:0044822	poly(A) RNA binding	molecular_function	8	304	5668	98659	0.991892	1	0.458061	NM_001242902.1;NM_001242903.1;NM_003321.4;NM_003488.3;XM_005257707.1;XM_005257709.1;XM_011525318.1;XM_011545928.1
GO:0007283	spermatogenesis	biological_process	1	304	2432	98659	0.99564	1	0.133444	XM_011513250.1
GO:0005813	centrosome	cellular_component	2	304	3037	98659	0.995786	1	0.213722	NM_001145412.2;NM_001145413.2
GO:0043231	intracellular membrane-bounded organelle	cellular_component	2	304	3081	98659	0.996238	1	0.210669	NM_001083607.1;XM_011513250.1
GO:0003674	molecular_function	molecular_function	3	304	3678	98659	0.99665	1	0.264711	NM_052966.3;XM_011509140.1;XM_011509141.1
GO:0005576	extracellular region	cellular_component	3	304	5610	98659	0.999978	1	0.173549	NM_021948.4;NM_198427.1;XM_011509866.1
GO:0005730	nucleolus	cellular_component	1	304	4344	98659	0.999983	1	0.0747091	NM_001243079.1
GO:0005634	nucleus	cellular_component	53	304	29425	98659	1	1	0.584551	NM_001145412.2;NM_001145413.2;NM_001186.3;NM_001197297.1;NM_001278439.1;NM_001291428.1;NM_001291431.1;NM_004184.3;NM_004472.2;NM_005068.2;NM_007056.2;NM_015898.2;NM_032199.2;NM_138477.2;NM_138761.3;NM_138763.3;NM_138764.4;NM_145260.2;NM_173701.1;NM_206866.2;NM_213645.1;NM_213646.1;XM_005254176.3;XM_005259570.3;XM_005259571.3;XM_005259572.2;XM_005267100.2;XM_005268044.2;XM_006718211.1;XM_006718213…
GO:0008270	zinc ion binding	molecular_function	1	304	7466	98659	1	1	0.0434685	XM_011518522.1
GO:0005654	nucleoplasm	cellular_component	10	304	17097	98659	1	1	0.189821	NM_001197297.1;NM_006339.2;NM_018842.4;NM_032199.2;XM_006718211.1;XM_006718213.1;XM_011513250.1;XM_011531513.1;XM_011531514.1;XM_011540262.1
